# Supplementary material for: A novel translational control mechanism involving RNA structures within coding sequences
Source: HighWire-hosted journal article supplement (doi:10.1101/gr.209015.116), 2016-11-07
Supplement: Supplemental_Methods.docx [file Supplemental_Methods.docx]

**SUPPLEMENTAL METHODS:**

**Yeast cells and methods**

WT *Saccharomyces cerevisiae* strain YPH500 (*Matα ura3-52 lys2-801 ade2-101 trp1Δ63 his3-Δ200 leu2-Δ1*) and the derivative *dhh1Δ* deletion strain were used (Diez et al., 2000; Mas et al., 2006) throughout the study if not otherwise indicated. Ribosome profiling and RNA-seq and their validations were carried out in BY4741 (*MATa his3Δ1 leu2Δ0 met15Δ0 ura3Δ0*) and in the derivative *dhh1Δ* deletion strain (*MATa his3Δ1 leu2Δ0 met15Δ0 ura3Δ0 dhh1::kanMX*). CRAC was carried out in BY4741 with genomic Dhh1-HTP (*MATa leu2Δ0 met15Δ0 ura3Δ0 Dhh1-HTP*). Yeast cells were grown in standard media selective for the desired plasmids with 2% galactose at 30°C until the doubling time between triplicates was similar and an OD600 of ~0.6 was reached.

**Plasmids**

Standard molecular cloning techniques were used to generate new plasmids. Primer sequences are available upon request. WT BMV RNA2, RNA3 and RNA4 were expressed from plasmids pB2NR3 (Chen et al., 2001), pB3RQ39 (Ishikawa et al., 1997) and pB4MK1 (Noueiry et al., 2003). BMV/BMV/PolyA, GAL1/BMV/BMV, GAL1/BMV/PolyA, BMV/GFP/BMV, GAL1/BMV/PolyA were expressed as described previously (Noueiry et al., 2003). p414PDhh1 was used to express DHH1 WT under its own promoter (Alves-Rodrigues et al., 2007). Plasmids expressing *DHH1* mutants (pJJ11-pJJ18) were generated using the Quickchange site-directed mutagenesis kit from Agilent. Dhh1-Flag was expressed from pRP1053 (Coller et al., 2001).

Plasmids pJJ-16, pBBM6, pBBM14, pBBM16, pBBM17, pJJ26, pJJ27, pJJ28 and pJJ29 were generated by PCR and verified by sequencing. pJJ-16 expresses a RNA2-RLUC fusion protein flanked by the 5’ and 3’UTR of the viral RNA2 under control of the *GAL1* promoter. pBBM6, pBBM16, pBBM17 and pBBM14 express derivatives of pJJ-16, where the 2a CDS has been shortened or in the case of pBBM14 completely removed. pBBM6 maintains amino acids 1-110 of the 2a protein RLUC, pBBM16 amino acids 1-29, pBBM17 amino acids 1-14. pJJ26 is based on pBBM16 and harbors several point mutations between nucleotides 42-62 to break the stem-loop. pJJ28 is based on pBBM16 but the stem-loop between nucleotides 42-87 was replaced by the stem-loop depicted in Figure 3D. pJJ29 is also based on pBBM16 but 100 nucleotides between the AUG and the start of the stem-loop have been inserted, while the structure was maintained.

**RNA and protein analysis**

Total protein and RNA extraction, Western and Northern Blot analysis were carried out as previously described (Jungfleisch et al., 2015). Primary antibodies to detect specifically 2a (Ishikawa et al., 1997), Pgk1 (Molecular Probes), Dhh1, eIF4A, Hsp104, Sec31, Spa2, Ste20 (Santa Cruz Biotechnologies), HTB2 (Abcam) GFP (den Boon et al., 2001), eIF4E and eIF4G (Firczuk et al., 2013) have been used. Specific antisera were used to detect Pat1 and Lsm1 (den Boon et al., 2001; Rodriguez-Cousino et al., 1995). Peroxidase- or fluorescence-conjugated secondary antibodies and ECL (GE Healthcare) were used depending on the primary antibody. Band quantification was achieved with means of ImageGauge and ODYSEE software analysis

To measure luciferase activity the Dual-Luciferase Reporter Assay System from Promega was used following the protocol provided by the manufacturer. Ten µl yeast culture were transferred directly to 100 µl 1x lysisbuffer provided by the manufacturer. After lysis a 10 µl aliquot was used for luminescence measurements by adding 200 µl of a LARII-Stop-Glo solution (1:1) in a FB12 Luminometer. Ten sec of equilibration time and 10 sec integration time were used.

RNA analysis was carried out by reverse transcription quantitative (q)PCR using TaqMan probes using qScript XLT One-Step RT-qPCR ToughMix from Quanta Biosciences. Twelve ng of total RNA were reverse transcribed and amplified using specific primers for all analyzed genes (sequences available upon request).

**RNA-coimmunprecipitation**

Coimmunprecipitations were carried out as we previously described (Jungfleisch et al., 2015). Briefly, 100 ml of yeast cultures were grown, harvested by centrifugation and disrupted using glass beads. 100 µg of each sample were used to control the input by Western Blot. Equal amounts of at least 1 mg total protein were used for anti-Flag-precipitation. After four washes 20% of each sample were used for Western Blot analysis. For RNA-coimmunprecipitations 100 µg of input and 50% of the output samples were analyzed by qPCR. The relative amount of RNA2 recovered after RIP was corrected by the amount in the input and by the one from the negative control (Dhh1) to control for unspecific binding.

**Ribosome profiling**

Cultures were grown from OD600=0.02 to mid-exponential phase (OD600 ~0.4) at 30°C, 200rpm in YPD (Formedium)**.** To stabilize elongating ribosomes, cells were treated with 100 µg/ml cycloheximide (CHX) for 1 min with continuous shaking and harvested by rapid vacuum filtration and flash freezing. A fraction of cells was kept for total RNA extraction.

Cells were pulverized under cryogenic conditions at 5 cps in a SPEX 6750 Freezer/Mill (SPEX SamplePrep) in 20 mM Tris-HCl (pH=7.5), 100 mM NaCl, 10 mM MgCl2, 1% Triton X100, 0.5 mM DTT, 100 µg/ml CHX. Cell debris was pelleted at 4oC, 3,000 gfor 3 min and the supernatant was further clarified by centrifugation at 4oC, 10,000 gfor 5 min. 10 OD260 units of extract were treated with 112.5 U RNase I (Ambion) for 60 min at 22oC, 1400 rpm in a Thermomixer. The reaction was stopped by addition of 100 U SUPERase In (Ambion) and extracts were resolved by centrifugation for 3 h at 35,000 rpm, 4oC in a TH-641 rotor (Thermo Scientific) on 7%-47% sucrose density gradients in 50 mM Tris-HCl (pH=7.5), 50 mM NH4Cl, 12 mM MgCl2, 0.5 mM DTT, 100 µg/ml CHX. Gradients were fractionated at 0.75 ml/min with continuous monitoring of OD254 values using a Biocomp Instruments Gradient Station (Teledyne Isco). Monosome fractions were collected and, following addition of SDS to 1%, flash-frozen and stored at -80oC. RNA was isolated from gradient fractions by the hot acid phenol method. Ribosome footprints were purified from monosome RNA by size selection of 28-32 nt fragments on 15% polyacrylamide, 8M urea, 1×TBE gels.

For RNA-seq of poly(A)-selected RNA, cells harvested by vacuum filtration were resuspended in ice-cold 50 mM NaOAc (pH=5.5), 10 mM EDTA. After addition of 1% SDS, cells were homogenized in the presence of 0.5 mm glass beads in a Precellys 24 bead beater (Bertin Technologies) for two cycles of 20 sec at power setting 6.5. Extracts were clarified by centrifugation at 4oC, 10,000 gfor 5 min, treated with 100 µg/ml Proteinase K for 20 min at 60oC. Total RNA was extracted with acid phenol and treated with TURBO DNase (Ambion). Poly(A) RNA was purified from 100 µg of total RNA by two rounds of selection with Poly(A)Purist MAG Kit (Ambion) according to the manufacturer’s instructions. Poly(A)-selected RNA was fragmented by alkaline hydrolysis in 50 mM sodium bicarbonate (pH=9.2), 1 mM EDTA for 20 min at 95oC, purified by ethanol precipitation, and fragments of 50-80 nt were size-selected on a 15% polyacrylamide, 8M urea, 1×TBE gel.

Sequencing libraries from ribosome footprints or randomly fragmented poly(A)-selected RNA were prepared essentially as described in (Ingolia et al., 2012), with minor modifications. 3’-adapter ligation was performed for 4 h at 22oC in a reaction containing 200,000 U of T4 RNA ligase 2 (truncated, NEB), 25% PEG 8000, and 10 U SUPERase In.

## Sequencing data analysis

Ribosomal footprint reads were exactly analyzed like in (Nedialkova and Leidel, 2015) except that only reads uniquely matching to the sense strand and containing not more than one mismatch in the seed sequence were used in subsequent analysis. Reproducibility plots show that the RNA-seq and RPF data were highly reproducible between replicates (r = 0.993-0.999). In order to calculate differences between conditions in specific regions, footprint reads were centered using the method described in (Ishimura et al., 2014). Differences in gene-level mRNA abundance and ribosome occupancy were tested with DESeq2 (Love et al., 2014). We used a padj < 0.1 and log-fold < 0.433 to select genes that were equally transcribed and then a padj < 0.1 for differentially translated genes without a log-fold threshold. The functional annotation tool of the GORILLA bioinformatics web server (http://cbl-gorilla.cs.technion.ac.il/) was used to analyse Gene Ontology (GO) term enrichment. Subsequently, REVIGO (<http://revigo.irb.hr/>) was used to summarize redundant GO terms and group them in functional categories (visualized in a TreeMap). Each functional category with a Benjamini-corrected *p*-value of less than 0.001 is displayed in Fig. 5 E and F.

In order to analyze RPF data from the point of view of pausing and elongation, we collected ribosome profiling reads filtered as indicated above but without removing the ones mapping to the first 15 codons of the transcripts. We then centered the reads following (Ishimura et al., 2014) in order to achieve 1 codon resolution, and calculated Ribosome Density (Ingolia et al., 2009) i.e., Observed divided by Expected reads per codon per transcript, where “Observed” corresponds to the reads centered at the given position and “Expected” corresponds to the average number of reads of each transcript (as opposed to the average of only the first 151 codons as in (Ingolia et al., 2009)). Metagene analysis average ribosome density across a virtual CDS where reads of all genes are average within the corresponding percentage bin, from 0% (start codon + 25 codons) to 100% (stop codon) in increments of 20%. We also compared ribosome density in the first 120 nucleotides (minus the first 5 codons) against the last 120 nucleotides by calculation the ratio of the two, as a more sensitive calculation of elongation deficiencies.

**CRAC experiments and analysis**

Cultures were grown from OD600=0.02 to mid-exponential phase (OD600 ~0.4) at 30°C, 200rpm in YPD or in SD-medium in the presence of BMV RNA2 to select for it. CRAC experiments were performed as previously described (Bohnsack et al., 2009; Bohnsack et al., 2012). CRAC reads were analyzed using pyicoclip (<http://regulatorygenomics.upf.edu/Software/Pyicoteo/pyicoclip.html>) in order to extract regions of significant binding (peaks). Pyicoclip is based on the modified False Discovery Rate algorithm (Yeo et al., 2009). Peaks were extracted from both replicates of WT and Dhh1-HTP data. Peaks from the Dhh1-HTPsamples that overlapped with peaks in the WT samples were discarded. Subsequently, only peaks identified in both Dhh1 datasets were taken as the final set of high confidence Dhh1 binding regions.

**PARS score analysis**

Our analysis of the relation between PARS score, propensity to physical interaction with Dhh1 and translational effects of Dhh1 on a given mRNA is based on a list of PARS scores computed for 3204 yeast genes (Kertesz et al., 2010). Each entry in the list consists in the score for each base belonging to a given gene. Mapping 5’UTR, CDS and 3’UTR inside these genes we compute a summary statistics for the PARS score of the 5’UTR, CDS and 3’UTR. Once we intersect the information about the gene coordinates with the PARS score, we find that we can compute such statistics for 2367 5’UTR regions, 2367 CDS regions and 2362 3’UTR regions. We classified the yeast proteins for which we have PARS scores in groups depending on whether they are translationally activated and bound by Dhh1, repressed and bound by Dhh1 or not affected by Dhh1. We checked whether PARS scores are significantly different across these three categories. We compared each case against the other 2 by contrasting the true difference in PARS score mean (of the mean score across a region), against the distribution of differences in mean obtained after permuting randomly 1000 times the labels of the genes in the two groups. This procedure allows us to compute an empirical p-value. The above approach was applied separately on the PARS values of 3 different regions of each gene: the 5'UTR, the CDS and the 3'UTR.

**Human cells and translation analysis**

DDX6 knockdown: RWP-1 cells (Dexter et al., 1982) were seeded in 6 well plates and transfected with 50nM of DDX6 siRNA (Ambion) or an irrelevant siRNA (Dharmacon) using Lipofectamine2000 (Invitrogen). Cells were directly lysed five days after transfection to collect protein and RNA extracts. Protein levels were measured by Western blot (WB) using rabbit α-PTCH1 (Millipore), rabbit α-DDX6 (MBL) or mouse α-Tubulin (Sigma), peroxidase-conjugated secondary antibodies and ECL (GE Healthcare). Band quantification was achieved with means of ImageJ software analysis. RNA was analyzed by qRT-PCR. Total RNA was extracted using the RNeasy kit (Qiagen) and cDNA was prepared using the RevertAid first strand cDNA synthesis kit (Fermentas). Twentyfive ng of cDNA were amplified using platinum SYBR® Green Master mix (Applied Biosystems) and an ABI 7900HT system (Applied Biosystems). Expression levels of *HPRT1* were used for normalisation purposes.

**Supplemental References:**

Alves-Rodrigues, I., Mas, A., and Diez, J. (2007). Xenopus Xp54 and human RCK/p54 helicases functionally replace yeast Dhh1p in brome mosaic virus RNA replication. J Virol *81*, 4378-4380.

Bohnsack, M.T., Martin, R., Granneman, S., Ruprecht, M., Schleiff, E., and Tollervey, D. (2009). Prp43 bound at different sites on the pre-rRNA performs distinct functions in ribosome synthesis. Mol Cell *36*, 583-592.

Bohnsack, M.T., Tollervey, D., and Granneman, S. (2012). Identification of RNA helicase target sites by UV cross-linking and analysis of cDNA. Methods Enzymol *511*, 275-288.

Coller, J.M., Tucker, M., Sheth, U., Valencia-Sanchez, M.A., and Parker, R. (2001). The DEAD box helicase, Dhh1p, functions in mRNA decapping and interacts with both the decapping and deadenylase complexes. RNA *7*, 1717-1727.

Chen, J., Noueiry, A., and Ahlquist, P. (2001). Brome mosaic virus Protein 1a recruits viral RNA2 to RNA replication through a 5' proximal RNA2 signal. J Virol *75*, 3207-3219.

den Boon, J.A., Chen, J., and Ahlquist, P. (2001). Identification of sequences in Brome mosaic virus replicase protein 1a that mediate association with endoplasmic reticulum membranes. J Virol *75*, 12370-12381.

Dexter, D.L., Matook, G.M., Meitner, P.A., Bogaars, H.A., Jolly, G.A., Turner, M.D., and Calabresi, P. (1982). Establishment and characterization of two human pancreatic cancer cell lines tumorigenic in athymic mice. Cancer Res *42*, 2705-2714.

Diez, J., Ishikawa, M., Kaido, M., and Ahlquist, P. (2000). Identification and characterization of a host protein required for efficient template selection in viral RNA replication. Proc Natl Acad Sci U S A *97*, 3913-3918.

Firczuk, H., Kannambath, S., Pahle, J., Claydon, A., Beynon, R., Duncan, J., Westerhoff, H., Mendes, P., and McCarthy, J.E. (2013). An in vivo control map for the eukaryotic mRNA translation machinery. Mol Syst Biol *9*, 635.

Ingolia, N.T., Brar, G.A., Rouskin, S., McGeachy, A.M., and Weissman, J.S. (2012). The ribosome profiling strategy for monitoring translation in vivo by deep sequencing of ribosome-protected mRNA fragments. Nat Protoc *7*, 1534-1550.

Ishikawa, M., Janda, M., Krol, M.A., and Ahlquist, P. (1997). In vivo DNA expression of functional brome mosaic virus RNA replicons in Saccharomyces cerevisiae. J Virol *71*, 7781-7790.

Ishimura, R., Nagy, G., Dotu, I., Zhou, H., Yang, X.L., Schimmel, P., Senju, S., Nishimura, Y., Chuang, J.H., and Ackerman, S.L. (2014). RNA function. Ribosome stalling induced by mutation of a CNS-specific tRNA causes neurodegeneration. Science *345*, 455-459.

Jungfleisch, J., Chowdhury, A., Alves-Rodrigues, I., Tharun, S., and Diez, J. (2015). The Lsm1-7-Pat1 complex promotes viral RNA translation and replication by differential mechanisms. RNA *21*, 1469-1479.

Kertesz, M., Wan, Y., Mazor, E., Rinn, J.L., Nutter, R.C., Chang, H.Y., and Segal, E. (2010). Genome-wide measurement of RNA secondary structure in yeast. Nature *467*, 103-107.

Love, M.I., Huber, W., and Anders, S. (2014). Moderated estimation of fold change and dispersion for RNA-seq data with DESeq2. Genome Biol *15*, 550.

Mas, A., Alves-Rodrigues, I., Noueiry, A., Ahlquist, P., and Diez, J. (2006). Host deadenylation-dependent mRNA decapping factors are required for a key step in brome mosaic virus RNA replication. J Virol *80*, 246-251.

Nedialkova, D.D., and Leidel, S.A. (2015). Optimization of Codon Translation Rates via tRNA Modifications Maintains Proteome Integrity. Cell *161*, 1606-1618.

Rodriguez-Cousino, N., Lill, R., Neupert, W., and Court, D.A. (1995). Identification and initial characterization of the cytosolic protein Ycr77p. Yeast *11*, 581-585.

Yeo, G.W., Coufal, N.G., Liang, T.Y., Peng, G.E., Fu, X.D., and Gage, F.H. (2009). An RNA code for the FOX2 splicing regulator revealed by mapping RNA-protein interactions in stem cells. Nat Struct Mol Biol *16*, 130-137.
