# Supplementary material for: A novel translational control mechanism involving RNA structures within coding sequences
Source: HighWire-hosted journal article supplement (doi:10.1101/gr.209015.116), 2016-11-07
Supplement: Supplemental_Table_1.xlsx [file Supplemental_Table_1.xlsx]

## Sheet: (A) Ribo Profiling
Supplemental Table S1: Ribosome profiling analysis. (A) Lists of genes translationally activated and repressed by Dhh1 including the log-fold change and the significance of RPF and mRNA levels between WT and dhh1∆ strain for each gene. (B) Overlap of ribosome profiling and CRAC data. List of genes translationally activated and bound by Dhh1 and of genes translationally repressed and bound by Dhh1.
		activated by Dhh1							repressed by Dhh1
		RPF		mRNA					RPF		mRNA
associated gene name	id	log2FoldChange_R	padj_R	log2FoldChange_LESSM	padj_LESSM		associated gene name	id	log2FoldChange_R	padj_R	log2FoldChange_LESSM	padj_LESSM
SPO7	YAL009W	0.405114	0.0755835	0.0806221	0.0300645		SWC3	YAL011W	-0.391804	0.0335301	0.0759184	0.101607
SYN8	YAL014C	0.338633	0.0357253	0.151457	0.0662026		DEP1	YAL013W	-0.456438	0.00159424	0.117702	0.0959278
FUN26	YAL022C	0.213056	0.0535517	-0.0150603	0.0344877		SAW1	YAL027W	-0.618666	0.00184916	0.02448	0.0362591
MYO4	YAL029C	0.653672	1.17569e-09	0.0510602	0.0309877		PRP45	YAL032C	-0.458609	0.0037338	-0.0239074	0.0461385
FUN12	YAL035W	0.188248	0.0263023	0.0375544	0.0177398		POP5	YAL033W	-0.547802	7.72609e-05	0.509488	0.717744
CLN3	YAL040C	0.657382	2.98638e-05	0.00924539	0.0352467		MTW1	YAL034W-A	-0.617815	0.00104606	0.0410907	0.0393984
SEN34	YAR008W	0.383455	0.040403	0.18961	0.0719828		AIM2	YAL049C	-0.192431	0.0849854	0.091738	0.0121441
BUD14	YAR014C	0.40466	0.000711326	0.193988	0.0480162		OAF1	YAL051W	-0.321022	0.00693327	-0.0906294	0.0207375
PEP1	YBL017C	0.232625	0.00352836	-0.153942	0.174657		RFA1	YAR007C	-0.153308	0.0939009	-0.0194013	0.00824199
RFT1	YBL020W	0.934296	1.21934e-13	-0.021466	0.0367081		UIP3	YAR027W	-0.36	0.00243148	-0.120739	0.023634
PIM1	YBL022C	0.455842	2.27926e-06	0.241806	0.0912802		SWH1	YAR042W	-0.19994	0.0929687	-0.263602	0.0992633
PET9	YBL030C	0.174298	0.0344889	0.0595016	0.080462		HTB2	YBL002W	-0.270096	0.000970287	-0.0324127	0.0130101
NUP170	YBL079W	0.635946	9.16159e-10	-0.0162327	0.0192981		HTA2	YBL003C	-0.206113	0.0464491	0.132631	0.00897666
TEL1	YBL088C	0.530554	0.0184009	0.112999	0.0931627			YBL010C	-0.501298	0.00146219	0.027583	0.0250401
MAP2	YBL091C	0.189536	0.0337039	0.16897	0.0387453		MCM2	YBL023C	-0.229914	0.0353307	0.237041	0.127337
	YBL100W-B	1.38274	0.00992047	-0.0695383	NA			YBL028C	-0.29024	0.0066693	0.0656147	0.104548
PKC1	YBL105C	0.294319	0.0134385	-0.181825	0.0363589		RIB1	YBL033C	-0.514276	4.84739e-06	0.116093	0.0306643
COQ1	YBR003W	0.258121	0.0622316	-0.192936	0.0542859		PRE7	YBL041W	-0.411473	8.53242e-08	0.0924904	0.00824199
GPI18	YBR004C	0.868901	1.27694e-09	0.0705334	0.0632483		PSY4	YBL046W	-0.398192	0.00492531	0.301653	0.292799
IPP1	YBR011C	0.472377	4.8712e-09	-0.252577	0.248303		SEC17	YBL050W	-0.246765	0.0195507	0.130375	0.0303627
MNN2	YBR015C	0.766757	5.70048e-18	-0.129542	0.0953168		HHF1	YBR009C	-0.41281	4.63269e-07	-0.0256933	0.00824199
YPK3	YBR028C	0.360288	0.00769146	0.240701	0.0848303		HHT1	YBR010W	-0.622192	2.5818e-16	0.248637	0.121144
CDS1	YBR029C	0.377266	0.000169183	-0.0581196	0.0114058		REB1	YBR049C	-0.278389	0.0234321	-0.0627202	0.0615149
FAT1	YBR041W	0.484151	2.01239e-05	0.198308	0.0687798			YBR062C	-0.404864	0.0029977	-0.204963	0.0923857
UBP14	YBR058C	0.257856	0.0163702	0.0765633	0.0400075		SPT7	YBR081C	-0.324991	0.00665022	-0.0492047	0.075164
TSC3	YBR058C-A	0.28795	0.00962694	-0.0131723	0.0180383		RFC5	YBR087W	-0.197257	0.0847988	0.556449	0.858924
ECM33	YBR078W	0.834711	3.14894e-21	0.136756	0.0662357		POL30	YBR088C	-0.219553	0.0201155	0.172354	0.0723205
SEC18	YBR080C	0.244803	0.00280607	-0.0401544	0.0518899		NHP6B	YBR089C-A	-0.751318	3.96529e-08	-0.0755513	0.0184328
TEC1	YBR083W	0.372709	0.0136956	-0.00579991	0.0110469		RXT2	YBR095C	-0.633535	5.33819e-07	0.0252759	0.0470658
IST2	YBR086C	0.256847	0.00645552	-0.107223	0.020175		SIF2	YBR103W	-0.375961	0.00740228	-0.00109365	0.00797966
PBY1	YBR094W	0.191151	0.0924719	-0.0728007	0.0286327		CMD1	YBR109C	-0.32122	0.000140907	-0.15546	0.020175
EXO84	YBR102C	0.305671	0.0113309	-0.11961	0.0389971		MUD1	YBR119W	-0.628288	2.65239e-05	0.0381438	0.0392529
CYC8	YBR112C	0.340148	0.000510953	-0.486411	0.66111		TFC1	YBR123C	-0.221018	0.094687	0.124981	0.0800015
TEF2	YBR118W	0.565483	2.9712e-10	-0.0325222	NA		OPY1	YBR129C	-0.473153	0.000449342	0.0218305	0.01451
VMA2	YBR127C	0.628891	3.77652e-17	-0.175359	0.257689		CCZ1	YBR131W	-0.367065	0.0333316	0.109521	0.0532503
HSL7	YBR133C	0.555711	7.31193e-06	0.0186387	0.00797966		RIB7	YBR153W	-0.609639	0.00165215	-0.00526398	0.0176146
CKS1	YBR135W	0.422603	0.000521139	0.146654	0.0476876		UBS1	YBR165W	-0.550056	0.000957127	-0.0276936	0.0212534
SPP381	YBR152W	0.568728	0.00661432	-0.281041	NA		SWD3	YBR175W	-0.359979	0.0351838	0.294325	NA
AMN1	YBR158W	0.290394	0.00673658	-0.249248	0.100425		DER1	YBR201W	-0.849508	1.03962e-06	0.00558586	0.0358252
TOS1	YBR162C	0.627981	2.23116e-17	-0.306871	0.417696		AME1	YBR211C	-0.705511	1.05327e-06	-0.0622893	0.0214936
EXO5	YBR163W	0.464679	0.065434	0.0862178	0.0166239		YBP1	YBR216C	-0.532801	1.41385e-05	-0.176589	0.0785637
TAF5	YBR198C	0.226549	0.0358061	0.00553017	0.00797966		SWC5	YBR231C	-0.858619	3.95547e-08	0.344411	0.357659
BEM1	YBR200W	0.261763	0.0303653	0.13562	0.0535156		TRS20	YBR254C	-0.352789	0.0142804	0.190163	0.167841
DUR1,2	YBR208C	0.323079	0.0921964	0.0198116	0.0800512		TSC10	YBR265W	-0.216358	0.0795984	0.170955	0.089155
ERV15	YBR210W	0.451024	0.0122957	0.197432	0.0924424		BIT2	YBR270C	-0.894705	0.0102824	-0.0660393	0.0344877
PDB1	YBR221C	0.483822	1.01129e-10	0.149944	0.0536314		UBX7	YBR273C	-0.347814	0.00424768	0.00445538	0.00824199
ROT2	YBR229C	0.715245	2.46475e-15	-0.201981	0.0497615		PGS1	YCL004W	-0.507257	0.0548567	-0.158254	0.0508176
VHC1	YBR235W	0.717055	3.01509e-08	-0.135172	0.0949048			YCL012C	-0.459585	0.00932884	0.0109083	NA
ALG7	YBR243C	0.535415	2.85514e-06	-0.10573	0.0726867			YCL021W-A	-0.980145	0.0734201	1.13511	NA
ISW1	YBR245C	0.169839	0.0776426	0.0642891	0.0277049		LSB5	YCL034W	-0.451325	2.03086e-05	-0.216854	0.0845762
RRT2	YBR246W	0.652551	6.9569e-06	0.209357	0.0766208		KAR4	YCL055W	-0.411146	0.00318871	0.27719	0.228829
SHM1	YBR263W	1.30614	1.49125e-58	-0.180721	0.318409		CDC10	YCR002C	-0.218458	0.0195249	-0.0586093	0.00824199
	YBR287W	0.220253	0.0816981	-0.0364291	0.134675		CIT2	YCR005C	-0.750959	1.26892e-07	0.751833	1
STP22	YCL008C	0.334256	0.0269625	-0.560707	0.804423		RVS161	YCR009C	-0.312311	0.00105905	-0.108075	0.0162129
ILV6	YCL009C	0.723315	4.641e-21	-0.169978	NA			YCR015C	-0.354034	0.0736454	0.00873074	0.0140046
BUD3	YCL014W	0.508435	4.48578e-06	-0.0260444	0.034379		MAK32	YCR019W	-0.507221	0.00698533	-0.160478	0.0465065
BIK1	YCL029C	0.434859	0.00110448	-0.116564	0.100581		NPP1	YCR026C	-0.521656	2.45818e-05	-0.254742	0.0964807
PDI1	YCL043C	0.729448	1.96912e-18	0.191209	0.0994158		RIM1	YCR028C-A	-0.411128	4.17643e-06	-0.0801589	0.0121441
PRD1	YCL057W	0.703927	4.49682e-18	0.237671	0.0942953		FUB1	YCR076C	-0.44735	0.00388997	0.0728026	0.0518899
VAC17	YCL063W	0.381275	0.0140189	-0.374829	0.322444		PAT1	YCR077C	-0.739575	3.29433e-18	0.12846	0.0192981
CWH43	YCR017C	0.435548	5.51063e-06	-0.443876	0.606207		OCA4	YCR095C	-0.462097	0.0033456	0.0777636	0.0601738
PMP1	YCR024C-A	0.180008	0.0965751	0.0129009	0.0877518		PTC1	YDL006W	-0.42595	0.00232741	0.244759	0.183606
RPS14A	YCR031C	0.632763	4.74972e-13	0.0517844	0.0443093		CDC7	YDL017W	-0.46975	0.0076202	0.327248	0.293475
PHO87	YCR037C	0.571463	0.000435885	-0.109758	0.0101104		MPS1	YDL028C	-0.719669	5.13136e-08	0.00654361	0.0534036
RSC6	YCR052W	0.26845	0.00977224	0.26865	0.0999999		ARP2	YDL029W	-0.312743	0.00114019	-0.0209234	0.00797966
SED4	YCR067C	0.492292	4.22428e-06	-0.0925331	NA		PRM7	YDL039C	-3.19398	1.61944e-12	0.468231	NA
ATG15	YCR068W	0.325164	0.0712894	0.0784111	0.0443859			YDL057W	-0.413867	0.0224836	-0.0238579	0.0272387
CPR4	YCR069W	0.419204	0.000410308	-0.0375059	0.0144357		COX9	YDL067C	-0.995572	2.68003e-15	0.168139	0.0928903
SRB8	YCR081W	0.534069	0.000102631	-0.0518614	0.0239705		ASM4	YDL088C	-0.251712	0.0258342	-0.0375139	0.00797966
CDC39	YCR093W	0.173404	0.0429196	-0.229483	0.135954		IWR1	YDL115C	-0.898213	3.51585e-11	-0.162505	0.0453756
CDC50	YCR094W	0.735412	2.32358e-10	-0.276049	0.167841		YFH1	YDL120W	-0.389474	0.00137176	-0.0413795	0.0149586
DBP10	YDL031W	0.361905	2.59262e-05	0.0981711	0.0242804			YDL129W	-0.446391	0.0216607	0.391443	0.448748
NAT1	YDL040C	0.381098	2.21091e-06	0.108872	0.0306643		SRF1	YDL133W	-0.321862	0.0306957	0.00874574	0.00797966
SLC1	YDL052C	0.705545	5.40582e-12	-0.0527386	0.0157107		CRD1	YDL142C	-0.674298	1.73699e-05	0.018181	0.0472537
USO1	YDL058W	0.747164	1.64147e-13	-0.29545	0.394567		CLB3	YDL155W	-0.242298	0.0607337	0.0256506	0.0109006
RPS29B	YDL061C	0.494879	2.46544e-07	-0.0159606	NA		CDC36	YDL165W	-0.288211	0.0257177	0.000108577	0.0127262
VAM6	YDL077C	0.373234	0.00847925	-0.0522441	0.00824199		FAP7	YDL166C	-0.229106	0.0439216	0.149608	0.0255249
NUR1	YDL089W	0.444289	0.00694054	-0.0698118	0.0270068		PCL9	YDL179W	-0.364785	0.0106505	-0.0840775	0.0270068
GET3	YDL100C	0.3283	2.40089e-05	0.121575	0.012808		MGT1	YDL200C	-0.5985	0.00139766	0.0149159	0.0182072
POL3	YDL102W	0.347423	0.000219173	0.173032	0.0860885		TIM22	YDL217C	-0.29877	0.027485	0.0855577	0.0144357
RPO21	YDL140C	0.625563	2.68003e-15	-0.32759	0.417789		SHS1	YDL225W	-0.181605	0.0929163	-0.0568017	0.0632483
BPL1	YDL141W	0.616699	3.36121e-09	-0.159416	0.0352304		YRB1	YDR002W	-0.25847	0.00476687	0.436667	0.483014
COP1	YDL145C	0.498132	1.99211e-08	0.112516	0.0113655		NRG1	YDR043C	-0.555345	0.00455168	0.0104507	0.0392529
RPN5	YDL147W	0.173773	0.0555633	-0.135487	0.117255		HEM12	YDR047W	-0.39222	0.000585624	0.130717	0.0629247
STE7	YDL159W	0.382284	0.0168943	-0.303172	0.219051		TPI1	YDR050C	-0.327494	1.13706e-05	0.149606	0.0645027
CDC9	YDL164C	0.317434	0.0030984	0.204901	0.0465065			YDR061W	-0.522974	1.83702e-05	-0.126976	0.0248583
VMA1	YDL185W	0.531838	5.28017e-13	0.109328	0.097966		OCA6	YDR067C	-1.05941	1.66949e-12	-0.00533596	0.020175
SEC31	YDL195W	0.47999	3.93175e-08	-0.56242	0.797929		APC4	YDR118W	-0.498011	0.00299288	-0.131476	0.0609057
ACK1	YDL203C	0.394262	0.00952976	0.0869552	0.0169584		DPB4	YDR121W	-0.308103	0.020821	0.324471	0.251313
GLE1	YDL207W	0.513996	0.00053595	-0.12154	NA		EKI1	YDR147W	-0.294868	0.0258521	-0.0615596	0.0176632
NOP6	YDL213C	0.278089	0.0176234	-0.185208	0.213084		TAF10	YDR167W	-0.310195	0.0123608	-0.226863	0.0800015
GCS1	YDL226C	0.475378	1.88767e-08	0.2046	0.0490994		CAB5	YDR196C	-0.376362	0.00489229	-0.119011	0.0685484
YPD1	YDL235C	0.323876	0.00498769	0.0862509	0.0500539		MSS4	YDR208W	-0.713823	3.87919e-11	-0.231511	0.0564937
AIM6	YDL237W	0.367962	0.000827361	-0.36641	0.442194		HTB1	YDR224C	-0.819047	2.63329e-25	-0.0659826	0.00797966
MRH1	YDR033W	0.221055	0.00513059	-0.251213	NA		HTA1	YDR225W	-0.322274	0.000119689	0.5885	0.91854
ENA5	YDR038C	1.26646	1.99674e-05	-0.118462	NA		PRP42	YDR235W	-0.27779	0.0753303	-0.139344	0.0824849
DET1	YDR051C	0.330324	0.0130937	0.157545	0.0340531			YDR239C	-0.256994	0.0416123	-0.0347661	0.0130101
LCB2	YDR062W	0.475155	4.90093e-08	0.299468	0.0910503		PEX5	YDR244W	-0.380749	0.00198244	-0.0319517	0.00824199
TVP23	YDR084C	0.33637	0.0060688	0.0466834	0.020175			YDR262W	-0.33544	0.00704054	0.152955	0.0499341
SSS1	YDR086C	0.377567	1.42094e-05	-0.237213	0.0978265		PEX10	YDR265W	-0.981888	8.45553e-07	-0.0844464	0.0268997
DNF2	YDR093W	0.32502	0.0014354	-0.120377	0.223894		CIA1	YDR267C	-0.244127	0.0712117	0.485862	0.651213
INO2	YDR123C	0.546755	0.0102073	0.10038	0.0471324		GLO2	YDR272W	-0.492409	1.67801e-06	-0.0531034	0.0321266
ARO1	YDR127W	0.490814	2.06741e-11	0.0109236	0.0705947		ATP5	YDR298C	-0.176906	0.0657424	0.174336	0.0811529
MTC5	YDR128W	0.432811	0.00281541	0.242196	0.0801543		HNT2	YDR305C	-0.549149	4.39078e-05	-0.128834	0.0493717
MTQ2	YDR140W	0.572018	0.000347963	0.205047	0.0863892			YDR306C	-0.904019	9.03148e-10	-0.209563	0.0483436
DOP1	YDR141C	0.220765	0.0240592	-0.173968	0.167841		TFB1	YDR311W	-0.216345	0.0799211	0.0760428	0.0766208
SEC1	YDR164C	0.484123	9.15925e-05	0.0788164	0.0111938		TIM11	YDR322C-A	-0.362164	0.00734385	-0.0446511	0.0248504
SEC7	YDR170C	0.367221	0.000605694	-0.0848557	0.0489529		PEP7	YDR323C	-0.401698	0.0658999	0.0375262	0.0303627
UBC1	YDR177W	0.197434	0.0534582	0.0470788	0.0190529			YDR338C	-0.868265	2.32358e-10	-0.073825	0.0236157
MSS116	YDR194C	0.278526	0.0135017	-0.224521	0.0928696		FCF1	YDR339C	-0.617442	2.49526e-09	0.12839	0.0551184
REF2	YDR195W	0.254247	0.0460487	0.0732854	0.0454912		HXT3	YDR345C	-0.255344	0.00982665	0.0812155	0.0577292
UME6	YDR207C	0.270058	0.0494187	-0.336144	0.391459		ATP17	YDR377W	-0.564038	7.97034e-08	-0.179281	0.0743234
	YDR210W	0.738208	4.51371e-13	0.131774	0.0314165		MUS81	YDR386W	-0.349015	0.0695295	0.0630533	0.0389916
AHA1	YDR214W	0.633165	6.19915e-12	0.186142	0.0588134		NCB2	YDR397C	-0.225006	0.0676373	0.0470078	0.0430974
GTB1	YDR221W	0.352145	0.00321507	-0.185097	0.171588		ADA2	YDR448W	-1.11623	9.21387e-18	-0.0415253	0.0191692
SSD1	YDR293C	0.275977	0.00192944	-0.422273	0.528718		YHP1	YDR451C	-0.530049	3.05717e-06	-0.158851	0.0270068
CFT1	YDR301W	0.72386	8.26847e-12	0.0360492	0.0163225		TFB3	YDR460W	-0.537213	0.000170969	0.379185	0.414669
YSP2	YDR326C	0.278978	0.0542335	0.0504142	0.012808		RIB3	YDR487C	-0.448477	3.0804e-07	0.0218955	0.025813
MSN5	YDR335W	0.469214	4.85174e-07	0.139334	0.0286905		PSP1	YDR505C	-0.750689	3.56369e-13	-0.0958487	0.0583598
PAL1	YDR348C	0.375638	0.000330175	0.0372353	0.0723205		GRX2	YDR513W	-0.353235	9.44891e-05	-0.108471	0.0129249
YPS7	YDR349C	0.755043	1.98245e-09	0.148904	0.0180383		URC2	YDR520C	-0.301496	0.0481969	0.134672	0.0500667
SBE2	YDR351W	0.247814	0.0311627	-0.245035	0.144436		FDC1	YDR539W	-0.512497	1.31652e-06	-0.057671	0.0212901
	YDR366C	0.75934	0.0111204	-1.02627	1		VAC8	YEL013W	-0.164456	0.0995092	-0.0110393	0.0470658
KEI1	YDR367W	0.243999	0.0663757	-0.388983	0.432398		EDC3	YEL015W	-0.207833	0.0427692	0.0495827	0.0469525
SAC7	YDR389W	0.271817	0.0367217	0.256143	0.0856851			YEL020C	-0.507703	0.00818999	-0.0447909	0.0290715
RPB7	YDR404C	0.595033	1.24171e-06	0.044187	0.0114058		RML2	YEL050C	-0.430833	0.000423045	0.0520243	0.0515866
TRS120	YDR407C	0.28561	0.0154152	0.065543	0.0493947		NPR2	YEL062W	-0.483205	0.0050612	-0.119306	0.0853391
ADE8	YDR408C	0.221929	0.0460049	-0.184968	0.16155		PRP22	YER013W	-0.533879	1.19096e-05	0.233392	0.13711
SIP1	YDR422C	0.276928	0.0250913	-0.172274	0.0333655		ISC1	YER019W	-0.392594	0.000819516	-0.051236	0.0112869
NPL3	YDR432W	0.446052	4.09622e-05	0.102822	0.0286327		CHO1	YER026C	-0.708641	1.34198e-19	-0.136734	0.0471427
SSN2	YDR443C	0.280725	0.0712922	-0.00251735	0.0337476		SMB1	YER029C	-0.647559	6.26666e-06	0.109621	0.0964524
PPN1	YDR452W	0.391314	0.000182514	-0.364231	0.267518		VHR2	YER064C	-0.500266	1.79662e-06	-0.150198	0.0418581
NHX1	YDR456W	0.383066	0.00071615	-0.0254666	0.0755661		RNR1	YER070W	-0.409192	6.26492e-06	-0.180437	0.0581755
PFA5	YDR459C	0.612508	0.0753691	-0.0918822	0.0309877			YER077C	-0.674978	1.01265e-05	0.0922239	0.0228083
	YDR476C	0.285276	0.0362104	-0.037935	0.0562639		AIM10	YER087W	-0.639197	8.84797e-06	-0.216784	0.0805454
KRE2	YDR483W	0.6892	4.21384e-15	-0.0613048	0.0951126		PUP3	YER094C	-0.265379	0.0190763	0.305401	0.128947
RPL37B	YDR500C	0.675345	1.03685e-10	0.231832	0.0640495		SSA4	YER103W	-0.439031	0.000444992	0.168872	0.146562
GRH1	YDR517W	0.688224	1.59835e-09	0.131921	0.033434		COM2	YER130C	-0.379619	0.00664992	0.344635	0.370126
AGE1	YDR524C	0.366349	0.0267135	-0.0596399	0.0236157			YER134C	-0.668692	3.24419e-08	-0.160333	0.053277
PAD1	YDR538W	0.597683	0.0028281	0.0534115	0.0289827		LSM5	YER146W	-0.265693	0.0254205	0.789343	1
YEA4	YEL004W	0.482702	0.0175776	-0.438348	0.532076		PUG1	YER185W	-1.02456	0.0581751	0.299728	NA
GCN4	YEL009C	0.381558	0.00656789	0.0704527	0.023953		SEC4	YFL005W	-0.34304	3.49864e-05	0.0308024	0.0229976
	YEL025C	0.481371	0.0113054	0.0621722	0.0295523		MDJ1	YFL016C	-0.278574	0.00690878	0.0133476	0.108743
MCM3	YEL032W	0.641167	3.30967e-10	0.168408	0.0612377		GNA1	YFL017C	-0.430281	0.000388647	-0.0162829	0.0284891
GDA1	YEL042W	0.854868	7.91926e-27	-0.0521537	0.0568235		GYP8	YFL027C	-0.500503	0.00370748	0.450756	0.545384
	YEL043W	0.983684	1.37806e-11	-0.173321	0.0393984		HAC1	YFL031W	-1.20777	6.3806e-12	0.185111	NA
MAK10	YEL053C	0.75857	3.69498e-07	-0.00101503	0.00824199		MOB2	YFL034C-B	-0.312281	0.0126968	-0.00884381	0.0500719
CAN1	YEL063C	0.203769	0.028879	-0.197292	0.147215		YPT1	YFL038C	-0.489623	5.62545e-08	-0.157093	0.063906
YND1	YER005W	0.534601	0.00056347	0.0258588	0.0512576		RPN11	YFR004W	-0.256578	0.00327121	0.249501	0.16127
SEC3	YER008C	0.327706	0.00577905	-0.00570549	0.0418581		IRC6	YFR043C	-0.357071	0.0799211	0.369227	0.378034
NTF2	YER009W	0.320963	0.00296737	0.168504	0.0537983		PDR1	YGL013C	-0.5153	8.79934e-07	-0.0909131	0.0129983
SBH2	YER019C-A	0.497054	1.37385e-07	0.124955	0.0350499		PGD1	YGL025C	-0.490848	0.000289495	-0.14961	0.0483436
PRO3	YER023W	0.455259	1.62369e-08	0.0466763	0.0207251			YGL041W-A	-1.08902	4.38714e-16	-0.179093	0.0918096
YPT31	YER031C	0.258414	0.00526303	0.0179126	0.00797966		RNA15	YGL044C	-0.211433	0.078773	0.029609	0.0164235
KRE29	YER038C	0.678578	0.00670301	0.0266054	0.0303627		GEP7	YGL057C	-0.588565	0.000188686	-0.126623	0.061409
ARG5,6	YER069W	0.710722	8.51868e-09	0.199887	0.0588134		MRH4	YGL064C	-0.535988	0.000349129	-0.160842	0.0966103
AIM9	YER080W	0.251958	0.00591935	0.0426987	0.0333655		ALG2	YGL065C	-0.277995	0.00849197	-0.00408785	0.00824199
SER3	YER081W	0.438135	0.0421371	-1.28526	1		MPS2	YGL075C	-0.338299	0.07124	-0.0214455	0.0389971
GET2	YER083C	0.284854	0.00634875	-0.326014	0.170109			YGL082W	-0.337921	0.00281197	-0.152576	0.0535156
SBH1	YER087C-B	0.57056	5.35062e-10	-0.0433516	0.0180383		NBP35	YGL091C	-0.425377	0.000444484	0.258301	0.152075
DOT6	YER088C	0.64179	3.19223e-08	-0.726582	1			YGL101W	-0.215241	0.0939187	0.555449	0.831265
PTC2	YER089C	0.301025	0.00226843	-0.498048	0.689734		CUE3	YGL110C	-0.513934	4.28937e-05	0.0925735	0.0719828
NUP157	YER105C	0.294562	0.00105807	0.07086	0.0567981		MON1	YGL124C	-0.447634	0.00498901	0.268273	0.122934
BOI2	YER114C	0.456538	0.000106389	-0.0524291	0.0326775		ITC1	YGL133W	-0.323399	0.0423861	0.101515	0.0800015
SCS2	YER120W	0.233145	0.00309652	-0.319801	0.2436		HUL5	YGL141W	-0.375388	0.00388523	0.0713981	0.0161041
GLO3	YER122C	0.414247	1.76961e-06	0.054032	0.00797966		SUT1	YGL162W	-0.359189	0.0564847	0.434971	NA
GDI1	YER136W	0.652444	5.20113e-14	0.0395755	0.0112869		RAD54	YGL163C	-0.549379	0.00011099	0.141994	0.0695737
EMP65	YER140W	0.408022	0.0189322	0.170091	0.0539128		CUP2	YGL166W	-0.549349	0.000289495	-0.0522404	0.02375
UBP3	YER151C	0.19721	0.0502718	-0.0784315	0.0782544			YGL185C	-0.764325	6.2862e-08	-0.149874	0.0662357
OXA1	YER154W	0.247932	0.043136	-0.407962	0.425317		COX4	YGL187C	-0.359729	0.0107011	0.30941	0.25347
CHD1	YER164W	0.323467	0.000844617	-0.406383	0.50865		YPT32	YGL210W	-0.521102	6.53792e-05	-0.193517	0.0497615
PAB1	YER165W	1.02706	1.45053e-32	-0.158202	0.196242		COG1	YGL223C	-0.465171	0.000771616	-0.0537784	0.0193632
PDA1	YER178W	0.170623	0.0344403	-0.430544	0.552301		EMC4	YGL231C	-0.249239	0.0253795	0.0363137	0.019912
TUB2	YFL037W	0.319962	0.00041514	0.149719	0.0286905			YGL242C	-0.251162	0.0333896	0.0584176	0.00824199
ATG18	YFR021W	0.532918	8.68693e-05	-0.0842322	0.0632483		SWC4	YGR002C	-0.363871	0.00614488	-0.0191471	0.0328567
MET10	YFR030W	0.244976	0.0753691	0.136667	0.0583598		CUL3	YGR003W	-0.334735	0.0165847	0.0926868	0.054921
	YFR032C-B	0.644436	0.077498	-0.20252	NA			YGR017W	-0.434749	8.40646e-05	0.0555592	0.0147217
PUF4	YGL014W	0.561627	7.43752e-07	-0.223984	0.0820443		VMA7	YGR020C	-0.178526	0.0576748	0.0254378	0.00797966
PIB2	YGL023C	0.266092	0.077498	-0.159229	0.0993356		ERV1	YGR029W	-0.493079	0.000123704	0.0676864	0.0123827
CWH41	YGL027C	0.497101	1.88911e-08	0.0198859	0.020995		UFD1	YGR048W	-0.287761	0.0237124	0.152422	0.0298484
DST1	YGL043W	0.525832	1.22484e-08	0.101431	0.0298484		PAC10	YGR078C	-0.216145	0.0565505	0.0788734	0.0322652
ERV14	YGL054C	0.277211	0.00345659	0.0928267	0.0121441		SLX9	YGR081C	-0.20815	0.0864275	0.552281	0.771276
NPY1	YGL067W	0.473537	6.74745e-05	-0.127992	0.0600372		ESP1	YGR098C	-0.323253	0.0174477	-0.134449	0.0800015
GUP1	YGL084C	0.278428	0.00995344	0.0204869	0.0171575		MDR1	YGR100W	-0.333626	0.00847925	-0.0796751	0.00824199
NUP145	YGL092W	0.190849	0.0383656	0.115396	0.0585819		CLB6	YGR109C	-0.308835	0.0515824	0.340995	0.34197
TAF6	YGL112C	0.196278	0.0589205	0.075024	0.00890801		COG2	YGR120C	-0.305394	0.069574	0.205969	0.108603
NAB2	YGL122C	0.314834	0.00354771	-0.158892	0.0212491		PHB1	YGR132C	-0.584649	2.51071e-09	-0.216308	0.0693238
SNT2	YGL131C	0.346702	0.0944375	-0.0326004	0.018574		MRPS35	YGR165W	-0.740107	4.82785e-12	-0.177909	0.0738187
SEC27	YGL137W	0.423348	3.48364e-08	0.0304007	0.028094		CLC1	YGR167W	-0.236125	0.027793	-0.227553	0.0831536
	YGL140C	0.353881	0.00102197	-0.00525679	0.0435322			YGR201C	-0.972096	0.00137892	0.300648	0.291488
INO80	YGL150C	0.463026	1.63305e-05	0.0729328	0.0114641		TRX2	YGR209C	-0.240575	0.0103252	0.0453408	0.00797966
XRN1	YGL173C	0.671434	5.81727e-20	-0.0322664	0.0291489		PET54	YGR222W	-0.873824	5.95632e-07	-0.211901	0.0882796
RPS26A	YGL189C	0.713519	3.79667e-19	-0.00251628	0.00310633		HSV2	YGR223C	-0.481937	0.00239661	-0.133832	0.0256516
MCM6	YGL201C	0.297975	0.00501966	0.0424142	0.00797966		MIC26	YGR235C	-0.936777	1.05588e-19	-0.231315	0.0935587
KEX1	YGL203C	0.757935	1.54114e-13	0.10043	0.0564937		RAD2	YGR258C	-0.417974	0.015311	0.12505	0.0659329
SPT16	YGL207W	0.29759	0.000122481	0.0126696	0.00797966		SLH1	YGR271W	-0.277276	0.00873627	0.104863	0.0500539
CLG1	YGL215W	0.647003	1.35439e-05	-0.405065	0.422586		RTT102	YGR275W	-0.340869	0.00953898	-0.206116	0.0659778
SDT1	YGL224C	0.301201	0.0573259	-0.0362528	0.020175		IMA1	YGR287C	-0.61469	0.0566616	0.39619	0.484653
OST5	YGL226C-A	0.413792	0.000487905	0.0731179	0.0622089		HSE1	YHL002W	-0.47002	7.65475e-06	-0.223978	0.0562639
CSE1	YGL238W	0.670227	8.252e-16	0.25159	0.0755661		YLF2	YHL014C	-0.385372	0.0572752	-0.039161	0.0470658
RTG2	YGL252C	0.208927	0.0779712	0.0742163	0.0361728		APM2	YHL019C	-0.602203	0.000351787	-0.0792927	0.0604836
ECT1	YGR007W	0.295795	0.0127568	0.0633368	0.00824199		OPI1	YHL020C	-0.242941	0.0948874	0.234863	NA
	YGR012W	0.315407	0.0362104	-0.049997	0.0109909		SNF6	YHL025W	-0.812655	1.9208e-10	-0.0972088	0.0175389
MSB2	YGR014W	1.42046	9.21412e-30	-0.0205492	0.0670147		OCA5	YHL029C	-0.25585	0.0773293	0.216469	0.115162
THG1	YGR024C	0.535126	0.000466884	0.143201	0.0640043		TDA3	YHR009C	-0.181677	0.0925789	-0.0227392	0.0333655
RPS25A	YGR027C	0.227433	0.00923735	0.195284	0.0953719		COX6	YHR051W	-0.451117	3.23736e-05	-0.112764	0.0163225
CAX4	YGR036C	0.482977	0.0026076	-0.0131137	0.0272387		HXT4	YHR092C	-0.552146	6.05634e-05	0.00486991	0.0593555
	YGR054W	0.657966	2.9035e-14	0.0391498	0.00824199		KIC1	YHR102W	-0.2297	0.0506422	-0.172403	0.0360035
ERG25	YGR060W	0.586499	5.32559e-12	0.164545	0.0328567		CTM1	YHR109W	-0.449	0.0122957	-0.0816396	0.0564937
ENV11	YGR071C	0.271371	0.0913588	-0.19464	0.0845762		APE4	YHR113W	-0.256967	0.0209926	-0.160671	0.0662026
VMA21	YGR105W	0.328379	0.00460912	0.244376	0.0976246		ORC6	YHR118C	-0.641556	2.86386e-06	0.124877	0.0924424
PSD2	YGR170W	0.336078	0.0374789	0.021497	0.00824199		CIA2	YHR122W	-0.297565	0.0238341	0.0770574	0.0562639
PBP1	YGR178C	0.512979	4.18568e-10	0.208428	0.0588134			YHR131C	-0.336119	0.0709725	0.0589085	0.0333655
CRH1	YGR189C	0.214725	0.0294861	0.1436	0.0284088		MPC2	YHR162W	-0.183341	0.0665191	0.444242	0.532076
TDH3	YGR192C	0.406143	1.39701e-05	-0.165338	0.145795		PRP8	YHR165C	-0.184577	0.0696373	0.0120423	0.0270068
CRM1	YGR218W	0.418579	4.46133e-08	-0.0356311	0.0265495		CDC23	YHR166C	-0.334464	0.0464134	0.0385701	0.0175389
PFK1	YGR240C	0.220596	0.0028751	0.0872321	0.0947781		THP2	YHR167W	-0.958565	1.31099e-08	-0.00892009	0.0470658
YAP1802	YGR241C	0.282248	0.0176119	-0.361108	0.308271		STB5	YHR178W	-0.380779	0.0753691	0.0186236	0.00830201
NOP19	YGR251W	0.330705	0.0576748	0.140064	0.0853391			YIL001W	-0.425571	0.0101672	-0.117894	0.0318092
FOL2	YGR267C	0.484596	1.75271e-06	0.0863141	0.00840982		NEO1	YIL048W	-0.214986	0.0566309	-0.0567337	0.0470658
SCW4	YGR279C	0.774609	1.96594e-16	-0.308049	0.399902		SEC28	YIL076W	-0.221212	0.0406936	0.121637	0.0568235
LAG1	YHL003C	0.377154	4.7907e-05	0.057923	0.0793616			YIL108W	-0.205192	0.0668465	0.156486	0.161353
STE20	YHL007C	0.46152	4.86714e-06	0.0679832	0.017393		FLX1	YIL134W	-0.458821	0.0503707	-0.0727759	0.0605336
	YHL026C	0.840551	0.00618152	-0.529729	0.759324		ESL1	YIL151C	-0.601607	3.41677e-05	0.0369662	0.00824199
ARD1	YHR013C	0.181088	0.0807583	0.162732	0.0562081		IMP2'	YIL154C	-0.848302	1.40402e-11	0.106803	0.0636501
DAP2	YHR028C	0.406509	0.000345529	-0.0829945	0.0199648		YAP5	YIR018W	-0.672571	1.37965e-05	0.0100427	0.0144357
SRB2	YHR041C	0.383831	0.0103109	-0.114595	0.160631		MRS1	YIR021W	-0.458528	0.0117186	-0.0685694	0.0212534
NCP1	YHR042W	1.48119	2.96148e-57	0.0274913	0.0531783			YIR035C	-0.339367	0.0201552	-0.0816353	0.0349986
AAP1	YHR047C	0.798087	1.08973e-22	0.0415284	0.0882002		CTK2	YJL006C	-0.632423	4.78502e-05	0.317281	0.296118
RSC30	YHR056C	0.227039	0.0792846	-0.0920929	0.0291489		RPC17	YJL011C	-0.343767	0.0144511	0.607486	0.880361
CPR2	YHR057C	0.266753	0.0429337	0.0370059	0.0121441		RNR2	YJL026W	-0.300288	0.00198498	-0.0106748	0.0949468
VMA22	YHR060W	0.318863	0.0344889	-0.287999	0.446169		VPS53	YJL029C	-0.286138	0.0245365	0.125801	0.018467
OSH3	YHR073W	0.362468	0.00394788	-0.0501883	0.0185123		BET4	YJL031C	-0.731299	8.33182e-09	0.199263	0.0693238
QNS1	YHR074W	0.210244	0.0373424	-0.0106729	0.0367081		RTT101	YJL047C	-0.351417	0.0279309	-0.0693638	0.0208379
IRE1	YHR079C	0.459501	0.00177242	-0.00114344	0.00807692		PEP8	YJL053W	-0.387686	0.00055983	-0.194301	0.0501979
SAM35	YHR083W	0.510892	6.19287e-05	-0.0299229	0.00797966		IKS1	YJL057C	-0.795477	1.83704e-06	-0.151419	0.0559637
STE12	YHR084W	0.581503	7.43752e-07	0.0325805	0.0555635		BNA3	YJL060W	-0.286147	0.0052138	0.0826906	0.054921
SFB3	YHR098C	0.597325	1.39465e-11	-0.119748	0.020175			YJL133C-A	-0.695203	2.32676e-07	-0.00702463	0.0288998
TRA1	YHR099W	0.182681	0.0495963	0.0226092	0.0290715		TIM17	YJL143W	-0.313069	0.000918918	-0.0829616	0.0598317
BIG1	YHR101C	0.518211	0.00232462	-0.131496	0.0695737		DAS1	YJL149W	-0.442811	0.0022225	-0.0919314	0.0176632
GGA2	YHR108W	0.38771	2.3265e-06	-0.0134588	0.0127905		QCR8	YJL166W	-0.444501	1.9413e-05	0.0788307	0.0144357
ERP5	YHR110W	0.334549	0.0374859	-0.237289	0.0743234			YJL181W	-0.358893	0.0428739	0.0376993	0.0565036
TOM71	YHR117W	0.400182	0.000263114	0.119645	0.0198467		ECM25	YJL201W	-0.33359	0.00673572	-0.167846	0.0309877
EPT1	YHR123W	0.352792	0.00118141	0.134679	0.0755661			YJL206C	-0.384127	0.0817261	-0.0470298	0.0785929
YCK1	YHR135C	0.20121	0.0256393	-0.315412	0.233523		APL1	YJR005W	-0.339301	0.00726745	-0.130534	0.0486689
DSE2	YHR143W	0.209796	0.0804985	-0.827817	NA		TDH2	YJR009C	-0.352726	0.000675699	0.0373724	0.0558638
RTT107	YHR154W	0.239775	0.0236601	-0.0604517	0.209185		RAD26	YJR035W	-0.351304	0.0251596	-0.13857	0.0718949
YSP1	YHR155W	0.401728	0.0047627	-0.242321	0.213666		ISY1	YJR050W	-0.586356	0.00110278	-0.0520621	0.0912802
KOG1	YHR186C	0.348278	0.002934	-0.0218707	0.00797966		RAD7	YJR052W	-0.719675	2.24841e-07	0.0470524	0.0268997
GPI16	YHR188C	1.24038	1.49306e-36	0.205884	0.0951126			YJR056C	-0.550116	0.000267253	0.0404433	0.0265495
ERG9	YHR190W	0.486344	3.84725e-09	0.263934	0.0683146		HAM1	YJR069C	-0.28526	0.00193574	0.300683	0.204032
AIM46	YHR199C	0.99795	1.79224e-13	0.241882	0.0610356		MOG1	YJR074W	-0.594472	4.089e-06	-0.137843	0.0615149
SCH9	YHR205W	0.153293	0.0997058	-0.175993	0.144436			YJR084W	-0.397671	0.0142023	-0.0757963	0.0306643
SKN7	YHR206W	0.702902	1.96511e-07	-0.139052	0.037533		EMC2	YJR088C	-0.720361	3.75798e-15	-0.0580796	0.00797966
EPS1	YIL005W	0.550342	3.39811e-08	-0.199274	0.106664		FIP1	YJR093C	-0.439254	0.00108434	-0.0777738	0.023953
URM1	YIL008W	0.240122	0.0553713	0.158243	0.0460853		JJJ3	YJR097W	-0.341739	0.0675781	0.490104	0.672238
TIM44	YIL022W	0.456798	4.71496e-05	0.105935	0.0350015		YUH1	YJR099W	-0.251306	0.0704788	0.0921667	0.0332946
SYG1	YIL047C	0.501026	2.70869e-06	0.122388	0.0656254		AIM25	YJR100C	-0.398593	0.0117928	0.0115297	0.0144357
DFG10	YIL049W	0.45618	0.0577036	-0.220885	0.216515		NNF1	YJR112W	-0.502061	0.0150517	-0.0162338	0.0583701
SER33	YIL074C	0.281988	0.00932884	0.118977	0.0904917		XPT1	YJR133W	-0.324068	0.00694273	-0.053084	0.0199648
RPN2	YIL075C	0.257173	0.00127534	0.164406	0.0121441		TTI2	YJR136C	-0.492799	0.0060688	0.229856	0.0988286
AVT7	YIL088C	0.292822	0.0143146	-0.130725	0.0233711			YJR142W	-0.273668	0.0285706	-0.0840278	0.0392529
ICE2	YIL090W	0.680891	3.11129e-07	0.0162411	0.0308558		DID4	YKL002W	-0.305864	0.0163816	-0.121223	0.0303627
NUP159	YIL115C	0.409003	0.000300905	-0.0990781	0.0403661		ATP7	YKL016C	-0.276027	0.00674322	0.0480914	0.00970336
SIM1	YIL123W	1.00379	1.1025e-24	-0.0857338	0.0898844		SPT23	YKL020C	-0.689429	5.0711e-12	-0.0248233	0.0121441
STH1	YIL126W	0.265255	0.00663612	-0.0745867	0.0752477		NFU1	YKL040C	-0.283033	0.00621284	-0.0154097	0.00824199
RRT14	YIL127C	0.256416	0.047155	-0.260504	0.312004		PRI2	YKL045W	-0.437846	0.000128324	-0.128591	0.0950311
MET18	YIL128W	0.217868	0.0409943	0.141195	0.0178613		ELM1	YKL048C	-0.654055	6.16603e-05	-0.0261217	0.0657551
TAO3	YIL129C	0.819273	4.66541e-15	-0.104334	0.136366		ASK1	YKL052C	-0.509926	0.000469605	0.00203599	0.00824199
FKH1	YIL131C	0.35661	0.00232462	0.240801	0.0973856			YKL068W-A	-1.52979	4.48428e-36	0.514065	0.717047
RPL16A	YIL133C	0.705396	3.35186e-20	0.27176	0.097935			YKL075C	-0.737884	8.91993e-08	0.206097	0.117255
VHS2	YIL135C	0.27347	0.0304032	-0.420665	0.459309		CAB3	YKL088W	-0.737032	1.11186e-10	0.170195	0.0615149
TMA108	YIL137C	0.387701	9.0516e-06	0.123788	0.0282874		MIF2	YKL089W	-0.550996	0.000110409	-0.101786	0.0869332
PAN6	YIL145C	0.209818	0.0908092	-0.0658085	0.0334069		ABF1	YKL112W	-0.207832	0.0736739	0.141314	0.0238176
SLN1	YIL147C	0.299769	0.0186909	0.0261641	0.0111723		SHE2	YKL130C	-0.618929	5.67909e-07	0.27082	0.140251
MLP2	YIL149C	0.336267	0.0187899	-0.499309	0.692166		MTR2	YKL186C	-0.854272	3.91242e-15	0.119635	0.0356436
DAL81	YIR023W	0.27135	0.0523096	-0.321393	0.229563		ADD66	YKL206C	-0.230813	0.0971183	0.119324	0.0317796
CYR1	YJL005W	0.438279	3.02225e-05	-0.0614057	0.056497		RSC4	YKR008W	-0.300687	0.00372305	0.0804915	0.0594502
MPS3	YJL019W	0.629903	1.19406e-05	-0.0248856	0.0165225		BCH2	YKR027W	-0.276157	0.0792846	0.366463	0.34284
NUP192	YJL039C	0.360209	5.30189e-05	0.113862	0.0777024		SPC34	YKR037C	-0.360438	0.0288777	0.00855984	0.00890801
NSP1	YJL041W	0.657193	4.95879e-10	-0.00631917	0.00941153		YSR3	YKR053C	-0.698702	0.0771595	0.103481	NA
GYP6	YJL044C	0.53681	0.000150763	0.228428	0.0836922		RHO4	YKR055W	-0.438549	0.00337894	0.149425	0.0548129
YHC3	YJL059W	0.348609	0.0910723	-0.144225	0.0987839		TFA2	YKR062W	-0.249862	0.0210041	0.0190476	0.0109006
NUP82	YJL061W	0.320672	0.00298791	0.124366	0.0564937		LAS1	YKR063C	-0.366308	0.0269625	0.204944	0.124258
LAS21	YJL062W	1.13137	1.23514e-27	-0.0948865	0.0629247		CCP1	YKR066C	-0.641639	1.43862e-10	-0.107844	0.0754287
JEM1	YJL073W	0.95257	2.42099e-12	-0.0418039	0.0242804		BET3	YKR068C	-0.454221	0.000119608	0.169166	0.1253
ARP4	YJL081C	0.345265	0.00309398	0.139367	0.0144357		AIM29	YKR074W	-0.404828	0.00011856	0.00681407	0.00824199
GWT1	YJL091C	0.375089	0.00109179	-0.0202932	NA		OMA1	YKR087C	-0.42935	0.000594088	0.115893	0.0656254
TOK1	YJL093C	0.60388	0.00194513	0.0339216	0.0220626		PCC1	YKR095W-A	-0.302874	0.0460487	-0.0188328	0.0755661
PHO86	YJL117W	0.447849	7.85251e-06	-0.00438855	0.00797966		SIR1	YKR101W	-0.372581	0.0480671	-0.15662	0.0933584
SPT10	YJL127C	0.526027	0.00169247	0.148842	0.0749158		ORC3	YLL004W	-0.354971	0.00875041	0.332616	0.342291
PBS2	YJL128C	0.352409	0.000643915	-0.0520272	0.00941153			YLL007C	-0.365147	0.0312811	0.115469	0.0583701
URA2	YJL130C	1.04918	1.0897e-37	-0.295079	0.423613		PSR1	YLL010C	-0.298157	0.015297	0.0808898	0.0208379
VPS35	YJL154C	0.469402	1.10034e-06	0.109107	0.0226057		HSP104	YLL026W	-1.14961	1.88578e-39	-0.162172	0.0706911
CIS3	YJL158C	0.398853	1.37562e-06	-0.00430841	0.0160546		FRA1	YLL029W	-0.504626	9.81586e-08	-0.0432795	0.0114641
KRE9	YJL174W	0.332276	0.00159714	-0.0466666	0.00807692		COF1	YLL050C	-0.563355	1.82683e-13	-0.135261	0.0312112
UBP12	YJL197W	0.508334	1.01176e-05	0.156339	0.0399874		GTT2	YLL060C	-1.02687	0.000779299	-0.134855	0.0778972
LAA1	YJL207C	0.194982	0.0766284	0.00827791	0.0489529		AYT1	YLL063C	-0.437403	0.064161	-0.0975901	0.0685484
SAG1	YJR004C	1.40351	0.00770201	-0.318184	0.268005		SSK1	YLR006C	-0.596388	7.17461e-06	-0.231879	0.0953168
GEA1	YJR031C	0.421926	0.00011724	0.129168	0.0630146		PML1	YLR016C	-0.546826	0.00797977	0.273844	0.212418
OSM1	YJR051W	0.250311	0.0477757	0.0347476	0.00797966		SED5	YLR026C	-0.203341	0.071903	-0.131294	0.089915
TOR1	YJR066W	0.39116	0.000453811	-0.0169804	0.0822863			YLR049C	-0.398885	0.000124881	-0.0553134	0.0190016
CPA2	YJR109C	0.482308	6.01511e-06	0.0140261	0.0392529		PER33	YLR064W	-0.367472	0.00326163	0.227461	0.127396
	YJR120W	0.520201	0.0467634	-0.568585	NA		FYV7	YLR068W	-0.347572	0.0825522	0.0180555	NA
MET5	YJR137C	0.401244	0.00780699	-0.22852	0.238104		NYV1	YLR093C	-0.206909	0.0563867	-0.213064	0.0471427
HIR3	YJR140C	0.418205	0.000688968	-0.107712	0.0747411		GIS3	YLR094C	-0.302072	0.00550825	-0.0505468	0.0378017
HMS2	YJR147W	0.779124	9.00223e-05	-0.19107	0.132336		CHA4	YLR098C	-0.793424	4.84042e-07	-0.145467	0.0644639
BYE1	YKL005C	0.400415	0.0154854	0.0521302	0.020995		REX3	YLR107W	-0.352199	0.0259645	0.0795172	0.0207251
	YKL023C-A	0.625718	0.000160341	0.0284881	0.0290715		HOG1	YLR113W	-0.342908	0.000403482	0.0913122	0.0182754
TTI1	YKL033W	0.593571	0.00019728	0.160659	0.0356542		MAS1	YLR163C	-0.197496	0.0961226	-0.213678	0.069069
PHD1	YKL043W	1.30948	5.88226e-17	0.18462	0.0838173		SEC10	YLR166C	-0.315922	0.00360905	0.0153895	0.0319994
DCW1	YKL046C	0.219519	0.0209852	0.101794	0.00941153		PEX13	YLR191W	-0.418834	0.0029977	-0.0370526	0.0403661
NUP120	YKL057C	0.415252	2.76684e-05	0.0908437	0.0183032		CLB4	YLR210W	-0.273634	0.0896066	0.179671	0.0739065
HOT13	YKL084W	0.265381	0.0777563	-0.0586763	0.0427874		CCC1	YLR220W	-0.610056	1.15169e-08	0.061376	0.105863
HSL1	YKL101W	0.472836	5.70112e-07	-0.0831661	0.102903		IFH1	YLR223C	-0.321675	0.00715387	-0.0183948	0.0600372
AVT3	YKL146W	0.222213	0.046731	-0.0112802	0.0444219			YLR225C	-0.551058	1.95453e-06	0.326579	NA
RPS27A	YKL156W	0.244877	0.0435602	0.140924	0.0588134		SSP120	YLR250W	-0.210308	0.0383131	0.378785	0.355847
MCD4	YKL165C	0.367294	0.0013316	-0.106567	NA		MCP2	YLR253W	-0.448268	0.003228	-0.141995	0.0878821
RPL17A	YKL180W	0.852145	2.39132e-24	0.190419	0.0214216		HAP1	YLR256W	-0.3863	0.000101643	0.0391348	0.0470658
FAS1	YKL182W	0.421824	2.3648e-07	-0.324975	0.455754		MCM5	YLR274W	-0.204393	0.0449976	-0.12921	0.023634
PEX1	YKL197C	0.329372	0.0207089	-0.249327	0.282063		ATP14	YLR295C	-0.797813	1.1457e-16	-0.251399	0.0878074
EMC3	YKL207W	0.233797	0.0223856	-0.044612	0.0484786		HRI1	YLR301W	-0.186302	0.0436383	0.244104	0.0638777
UBA1	YKL210W	0.416241	5.70563e-08	0.0281523	0.020995		UBC12	YLR306W	-0.626884	0.000596901	-0.102315	0.0557705
SAC1	YKL212W	0.392525	3.49006e-07	0.0202118	0.00797966		BUD6	YLR319C	-0.375156	0.00147427	-0.0525452	0.0101477
OXP1	YKL215C	0.40019	7.51329e-05	-0.0337087	0.0465065		ORM2	YLR350W	-0.182876	0.0918744	0.288861	0.275554
VPS1	YKR001C	0.192897	0.015546	0.187485	0.033361		STE11	YLR362W	-0.382312	0.00536005	-0.0124703	0.012808
PRY2	YKR013W	0.438362	0.000128626	0.0111588	0.00797966		MDM30	YLR368W	-0.37332	0.0638937	0.139582	0.0367081
KAE1	YKR038C	0.336686	0.00289071	0.265925	0.0948155		SSQ1	YLR369W	-0.356265	0.00385479	0.107297	NA
DYN1	YKR054C	0.357935	0.00650306	-0.432249	0.590753		ART10	YLR392C	-0.559407	0.00452938	-0.0416773	0.0467359
	YKR070W	0.611799	1.11105e-07	0.16122	0.0973799		VPS33	YLR396C	-0.514549	3.86386e-05	0.0651534	0.01451
SIS2	YKR072C	0.311066	0.00636397	-0.0455426	0.0289827			YLR407W	-0.418671	0.00332411	0.402439	0.446159
PRP16	YKR086W	0.362346	0.0228152	0.176634	0.050945		TUS1	YLR425W	-0.463452	0.00938755	-0.056907	0.0564937
MLP1	YKR095W	0.528423	9.82588e-07	-0.587142	0.787165		NBP1	YLR457C	-0.964144	0.000117744	0.0593886	0.0993356
MMM1	YLL006W	0.265323	0.0779299	0.0385221	0.0129983		GLO1	YML004C	-0.595398	2.36763e-11	0.047117	0.0465065
EMC6	YLL014W	0.532599	7.16168e-07	0.0545588	0.0800015		YOX1	YML027W	-0.490347	0.000213234	0.00255486	0.010011
DPS1	YLL018C	0.352552	1.35024e-05	-0.194041	0.176493		AMD1	YML035C	-0.227787	0.0207744	-0.125317	0.0111723
SPA2	YLL021W	0.591232	7.23539e-08	-0.0488136	0.183893		SML1	YML058W	-0.268919	0.00194845	-0.0362456	0.0643506
GPI13	YLL031C	0.327007	0.000995887	0.126118	0.0392529		ITT1	YML068W	-0.755393	0.00168143	0.156539	0.0564937
VPS13	YLL040C	0.496361	9.36057e-09	-0.522464	0.725451		UFO1	YML088W	-0.278804	0.027239	0.203372	0.0555635
FPS1	YLL043W	0.261409	0.0165914	0.17982	0.0496143		RPM2	YML091C	-0.847917	9.38563e-11	0.0317516	0.0467359
YBT1	YLL048C	0.18873	0.0222726	-0.080689	0.148704		GIM5	YML094W	-0.262151	0.0209909	-0.0860684	0.0693238
	YLR001C	0.40295	0.0021958	-0.14136	0.0716814		CTK3	YML112W	-0.455407	0.00503243	-0.0548877	0.0242249
SSL1	YLR005W	0.410067	0.000959332	0.157235	0.0367081		HXT2	YMR011W	-0.273008	0.0016912	0.0237464	0.120417
RIC1	YLR039C	0.248392	0.0774343	0.0661869	0.0790584		UBC7	YMR022W	-0.559725	2.20355e-07	-0.207493	0.0886405
PDC1	YLR044C	0.373529	1.34018e-05	-0.32129	0.348416		TAP42	YMR028W	-0.649795	5.60285e-07	-0.025756	0.0816563
FRE8	YLR047C	0.641137	0.000898049	0.0565541	0.0332466		SEN15	YMR059W	-0.750844	0.000323156	0.209414	NA
SPC3	YLR066W	0.404972	0.00110189	0.100928	0.0303627		AVO2	YMR068W	-1.40756	4.57714e-09	-0.0962042	0.0600372
RGR1	YLR071C	0.606948	2.6799e-08	0.0809934	0.0622089		ABF2	YMR072W	-0.89351	1.14063e-29	-0.165283	0.0173849
	YLR072W	0.400278	0.00289308	-0.263278	0.0872026			YMR087W	-0.804133	1.13891e-05	-0.0604073	0.0503404
BOS1	YLR078C	0.732665	1.01416e-08	0.110502	0.0441982		MTG1	YMR097C	-0.519489	0.00204751	0.0141753	0.0535156
CSF1	YLR087C	0.385823	0.0172621	-0.475973	0.665524			YMR099C	-0.21574	0.015297	-0.186752	0.0300304
GAA1	YLR088W	0.481942	2.88679e-06	0.073924	0.00797966		MUB1	YMR100W	-0.275571	0.066537	0.0428061	0.0347266
KIN2	YLR096W	0.220333	0.0500965	0.117842	0.0168824		RPL15B	YMR121C	-0.525235	3.58196e-06	-0.040665	0.010269
LCL2	YLR104W	0.300583	0.0601211	0.120507	0.0427874		MLH1	YMR167W	-0.296666	0.0649538	-0.100555	0.0333655
MDN1	YLR106C	0.572983	1.54225e-11	0.134187	0.0668682			YMR178W	-0.44726	1.35553e-05	-0.0973843	0.0138287
CFT2	YLR115W	0.442603	0.000838576	0.205272	0.0876545		GYL1	YMR192W	-0.358645	0.00393219	-0.0966738	0.0893853
NHA1	YLR138W	0.209277	0.0827717	0.189976	0.0827617		SKY1	YMR216C	-0.671991	1.33446e-11	-0.0167063	0.054481
DPH5	YLR172C	0.49174	2.75562e-08	-0.0184213	NA		MTF1	YMR228W	-0.566185	0.000117912	0.13958	0.0364657
RPL37A	YLR185W	0.278485	0.00513035	0.154531	0.023953		TRI1	YMR233W	-0.899997	1.15722e-08	0.17846	0.132586
MDL1	YLR188W	0.870902	1.44939e-12	0.150248	0.0505618		CUS1	YMR240C	-0.306932	0.0420723	0.575956	0.831929
YKE2	YLR200W	0.226316	0.0622478	-0.375942	0.549356		PRP24	YMR268C	-0.509024	0.00105865	0.154378	0.223666
HRD3	YLR207W	0.360611	0.00284942	-0.252282	0.183893			YMR295C	-0.176203	0.0805245	0.19624	0.126155
BUR2	YLR226W	0.316694	0.0492869	-0.00602034	0.0262561		DYN3	YMR299C	-0.51896	0.0140266	0.0291695	0.0303368
ADY4	YLR227C	0.802788	0.0672961	0.173977	0.0895013		HRB1	YNL004W	-0.425673	3.09314e-05	0.280619	0.146974
THI7	YLR237W	0.423086	0.00363031	0.202515	0.0840391		HHF2	YNL030W	-0.307522	0.000105325	0.18976	NA
NEJ1	YLR265C	0.412401	0.0540443	0.021956	0.0114641		SIW14	YNL032W	-0.339037	0.0222382	-0.184185	0.037533
YCS4	YLR272C	0.221898	0.0966712	-0.115062	0.0658009		COG5	YNL051W	-0.29825	0.0234449	0.0876778	0.069069
STT4	YLR305C	0.378862	8.94478e-05	-0.150653	0.187337		COX5A	YNL052W	-0.441371	0.000254469	0.221296	0.172237
FKS1	YLR342W	0.643843	5.44704e-19	-0.0110026	0.158153		END3	YNL084C	-0.43292	8.07076e-07	-0.0672532	0.0282257
NIT3	YLR351C	0.223724	0.0505852	-0.0920291	0.0129983		PHO23	YNL097C	-0.355572	0.0293881	-0.0299143	0.0190016
	YLR352W	0.292939	0.094707	-0.143981	0.0309877		RAS2	YNL098C	-0.201898	0.0413715	0.0241576	0.0389971
TAL1	YLR354C	0.199392	0.0248651	0.0645523	0.00824199		SPC98	YNL126W	-0.450911	0.00372077	-0.0844604	0.0129249
DCR2	YLR361C	0.583523	9.96046e-05	-0.37529	0.457813		MEP2	YNL142W	-0.986775	0.000100465	-0.0441434	0.0673677
NMD4	YLR363C	0.27535	0.0556959	0.066493	0.0161901		GIM3	YNL153C	-0.245246	0.0305703	0.44647	0.549356
SEC61	YLR378C	1.02158	1.00368e-33	-0.363239	0.433884		NSG2	YNL156C	-0.351754	0.00557735	-0.075962	0.0132672
SMC6	YLR383W	0.397246	0.028879	-0.150579	0.190724		BNI5	YNL166C	-0.26308	0.0554677	0.0331249	NA
SKI2	YLR398C	0.406684	1.87498e-05	-0.0656302	0.0258104		MDG1	YNL173C	-0.539382	3.56191e-05	-0.0854628	0.0831189
INA1	YLR413W	0.663148	3.9424e-10	0.212338	0.0397629		IES2	YNL215W	-0.335577	0.0289875	-0.157357	0.074373
	YLR422W	0.364907	0.0133158	-0.106275	0.0964524		RAP1	YNL216W	-0.225538	0.0920515	0.214609	0.0430974
TDA5	YLR426W	0.49227	0.00936087	-0.202805	0.087308		SSU72	YNL222W	-0.773647	2.46238e-10	-0.168712	0.0628103
SEN1	YLR430W	0.527234	2.56994e-08	0.0468121	0.0831189		SQS1	YNL224C	-0.411217	0.000360741	-0.0930226	0.0464829
IMD3	YLR432W	0.638475	1.12363e-12	0.124469	0.0417117		BNI4	YNL233W	-0.480273	0.00020185	0.140057	0.0845762
ECM7	YLR443W	0.562882	0.00623605	0.135365	0.0303368		TEX1	YNL253W	-0.410789	0.00399371	0.0644344	0.0300304
RPL6B	YLR448W	0.852328	3.53766e-28	0.174473	0.0562639		MRPL10	YNL284C	-0.312735	0.00682519	-0.239717	0.0899523
HMG2	YLR450W	0.264932	0.00878675	-0.265638	0.330099		MSB3	YNL293W	-0.51274	0.000146537	0.0263674	0.0190016
FMP27	YLR454W	0.332377	0.00836861	-0.36128	0.384569			YNL295W	-0.303257	0.0665191	0.0105897	0.0112507
ERV25	YML012W	0.665539	1.32874e-15	0.132847	0.0129983		YPT11	YNL304W	-0.333513	0.0406247	-0.0587917	0.0710062
NDC1	YML031W	0.90722	9.38192e-15	0.0726389	0.0114641		RFA2	YNL312W	-0.276321	0.00488497	0.011782	0.0123827
RAD52	YML032C	0.339606	0.0277681	0.178685	0.0744404		PHA2	YNL316C	-0.313245	0.0520005	0.0494897	0.0190016
YMD8	YML038C	0.292411	0.0588226	0.160146	0.0581755		PFS2	YNL317W	-0.387146	0.00399915	0.179878	0.074373
RSE1	YML049C	0.516607	2.99702e-05	0.106556	0.0294308		RPD3	YNL330C	-0.508476	4.33394e-07	-0.0180153	0.0140467
NTE1	YML059C	0.436226	2.04363e-05	0.109349	0.0603882		AAD14	YNL331C	-0.819235	0.0681889	0.13736	0.121462
TCB3	YML072C	0.346338	1.63333e-05	-0.34512	0.349644		CIT1	YNR001C	-0.467704	2.37946e-05	-0.214031	0.0949048
RPL6A	YML073C	0.786535	1.07913e-23	0.216372	0.0947191		VPS27	YNR006W	-0.331183	0.00543586	-0.108329	0.038619
TDA9	YML081W	0.243291	0.0696215	0.173787	0.0866439		CSE2	YNR010W	-1.18857	6.47555e-18	-0.131333	0.0799192
NUP188	YML103C	0.164072	0.0835805	-0.0231425	0.0466008		ATP23	YNR020C	-1.35752	3.63841e-22	0.02743	0.0382704
MDM1	YML104C	0.714956	0.000696324	0.0939084	0.0277049		SOL1	YNR034W	-0.677961	3.79571e-08	-0.16583	0.0978215
CLU1	YMR012W	0.753482	2.61741e-25	0.0235109	0.0338544		MSO1	YNR049C	-0.631967	2.46107e-06	-0.0983132	0.0456617
SEC59	YMR013C	0.445327	0.0116333	0.0844137	0.0265495		BIO4	YNR057C	-0.615511	0.0661095	0.140803	NA
MCM1	YMR043W	0.206988	0.0912352	-0.209859	0.169061			YOL013W-A	-1.18863	0.0285758	1.93961	NA
NUP116	YMR047C	0.318046	0.00239094	0.0170162	0.051003		ESC8	YOL017W	-0.595766	2.19258e-05	-0.0916135	0.0618445
NAT4	YMR069W	0.767101	0.0382411	-0.130376	NA		MSE1	YOL033W	-1.24212	1.86336e-15	-0.219805	0.0904917
NAM7	YMR080C	1.00052	2.85055e-30	0.146582	0.0258906		NGL1	YOL042W	-0.673966	2.53982e-05	0.0578292	0.0278032
PKR1	YMR123W	0.276625	0.0181885	-0.248133	0.152654		PEX15	YOL044W	-0.309467	0.0430206	0.170315	0.134011
TIF34	YMR146C	0.583117	2.50119e-12	0.27616	0.0926317		INP54	YOL065C	-0.371586	0.0104048	-0.221089	0.0863892
EAR1	YMR171C	0.506952	0.000653917	0.117823	0.023634		RIB2	YOL066C	-0.240652	0.0809015	0.308003	0.184341
DDR48	YMR173W	0.396028	0.000713291	-0.148195	0.0322652		HST1	YOL068C	-0.266255	0.0775344	-0.0437698	0.00824199
ECM5	YMR176W	0.387451	0.0340249	0.0739567	0.0270068		THP1	YOL072W	-0.418358	0.0136956	-0.163767	0.0437968
SSO2	YMR183C	0.406693	2.48792e-06	0.15737	0.0255414		ADH1	YOL086C	-0.201308	0.0184054	0.311687	0.272316
SGS1	YMR190C	0.38083	0.0439038	-0.152545	0.10511		DUF1	YOL087C	-0.546685	1.96047e-05	-0.253284	0.098986
CLN1	YMR199W	0.390169	0.00212107	-0.0627995	0.0208379		WSC3	YOL105C	-0.732307	0.00968563	-0.117329	0.0596197
ROT1	YMR200W	0.284296	0.00561578	0.0363845	0.014759		ZEO1	YOL109W	-0.220467	0.0364313	0.949426	1
GAS3	YMR215W	0.370524	6.28475e-06	0.051501	0.0517831		MDY2	YOL111C	-0.413869	1.59874e-05	0.000612432	0.0114058
TRS130	YMR218C	0.234418	0.0872355	0.18509	0.0516503		MSB4	YOL112W	-0.445928	0.0397795	-0.0275593	0.0212534
RNH1	YMR234W	0.356779	0.0607337	0.04864	0.0129983		MDH2	YOL126C	-0.62356	1.18362e-10	0.306724	0.28036
SCS7	YMR272C	0.238793	0.0104806	0.0238109	0.01451		PFK27	YOL136C	-0.600084	0.00019429	-0.15071	0.0756208
ZDS1	YMR273C	0.386899	0.0260998	-0.476433	0.645368		DCP1	YOL149W	-0.509171	4.706e-06	-0.136347	0.0454912
BUL1	YMR275C	0.549729	1.09051e-06	-0.175392	0.0493085		CYC2	YOR037W	-0.43377	0.0317201	-0.0180278	0.0300304
PRM15	YMR278W	0.33595	0.00276859	0.0529927	0.0286327		CUE5	YOR042W	-0.297848	0.0106505	-0.272214	0.0888758
ADE4	YMR300C	0.434242	6.6623e-05	0.12786	0.0447433		WHI2	YOR043W	-0.543828	6.53967e-07	-0.165853	0.0332315
	YMR310C	0.532807	6.24087e-05	0.0797491	0.0198467		STD1	YOR047C	-0.670718	2.60881e-07	0.0601133	0.0979679
	YNL018C	1.23811	0.0196532	-0.157305	NA		TMC1	YOR052C	-0.76609	4.07049e-10	0.335267	0.222159
COG6	YNL041C	0.216322	0.0889494	0.0489164	0.023634		VHS3	YOR054C	-0.273363	0.0809946	-0.0833604	0.0445952
LAP2	YNL045W	0.294905	0.00155385	-0.130039	0.167841		LPL1	YOR059C	-0.624164	0.00102917	-0.0809211	0.0132672
	YNL054W-A	0.985506	0.00336448	-0.946083	NA		YNG1	YOR064C	-0.684572	0.005429	-0.129571	0.087308
ARP5	YNL059C	0.233542	0.0500458	-0.35869	0.490349		SKI7	YOR076C	-0.22015	0.0809015	-0.050673	0.0953168
SUN4	YNL066W	0.548041	7.05691e-08	0.00776948	0.0465694		DIA2	YOR080W	-0.526245	0.0132043	-0.0531163	0.0656726
MKT1	YNL085W	0.485617	1.22083e-07	0.205878	0.0562639		ARF3	YOR094W	-0.457982	0.00118959	0.178096	0.11322
TOP2	YNL088W	0.628667	4.28523e-12	0.114873	0.0866439			YOR111W	-0.668098	3.71539e-05	0.0244777	0.0176632
AVT4	YNL101W	0.556431	5.52378e-05	-0.0606933	0.0231912		ADE2	YOR128C	-0.327826	0.00273203	-0.106174	0.0801543
INP52	YNL106C	0.546739	0.000153537	-0.0283298	0.0127738		ARP8	YOR141C	-0.309411	0.0100083	0.214134	0.0831189
DCP2	YNL118C	0.369172	0.00024716	-0.33155	0.41526		MDM32	YOR147W	-0.364213	0.0222979	0.244948	0.187412
ESBP6	YNL125C	0.448891	0.00818056	0.00593567	0.0231417		NFI1	YOR156C	-0.399337	0.00664618	-0.14838	0.0500719
THO2	YNL139C	0.631116	6.11679e-10	-0.0282705	0.0259188		HEM15	YOR176W	-0.449809	4.81556e-06	-0.0496227	0.0456896
INN1	YNL152W	0.281663	0.0737507	-0.19463	0.0542195		KIN4	YOR233W	-0.466406	0.000280882	0.167749	0.0332946
YCK2	YNL154C	0.344781	7.43666e-05	0.0920164	0.0180383		SSP2	YOR242C	-1.36062	0.0102744	0.390866	NA
SRP1	YNL189W	0.326911	1.88909e-05	0.267189	0.0987839		ESA1	YOR244W	-0.305446	0.0516431	0.234143	0.215796
	YNL190W	0.685765	2.69369e-09	-0.321063	0.318968		TMA16	YOR252W	-0.303042	0.0256768	-0.0524632	0.0616659
ALG9	YNL219C	0.514043	1.53286e-06	0.0703474	0.0677124		CDC31	YOR257W	-0.340102	0.0168949	0.00212092	0.0430974
JJJ1	YNL227C	0.536662	0.000576593	-0.215192	0.37728		HNT3	YOR258W	-0.70158	0.00417012	0.0365938	NA
URE2	YNL229C	0.195496	0.0885861	-0.182366	0.187412		PAC1	YOR269W	-0.363721	0.0966539	0.262515	0.221907
SIN4	YNL236W	0.250094	0.0425986	0.144064	0.0483557		HEM4	YOR278W	-0.374884	0.0198063	0.177491	0.0704578
KEX2	YNL238W	0.289543	0.00629546	0.116239	0.0630838		FSH3	YOR280C	-0.448626	0.000229279	-0.0636493	0.0239893
ZWF1	YNL241C	0.232945	0.0136025	-0.251363	0.281677		TIM18	YOR297C	-0.428214	0.00430925	-0.0994683	0.0306643
MPA43	YNL249C	0.572131	0.0178532	-0.00216203	0.0289058		MCH5	YOR306C	-0.665086	2.66236e-06	0.156443	0.0695824
POL2	YNL262W	0.240949	0.026703	-0.33394	0.304386		HSH49	YOR319W	-0.364505	0.0492985	0.0929355	0.0781998
WSC2	YNL283C	0.414358	0.00466303	-0.191562	0.0719828		LDB19	YOR322C	-0.21895	0.0738016	-0.0992576	0.012808
SEC21	YNL287W	0.430289	9.00194e-08	0.244622	0.0694585		SNC2	YOR327C	-0.238216	0.0219023	0.0809114	0.0757768
	YNL320W	0.257402	0.0976459	-0.12328	0.0867128		TYE7	YOR344C	-0.316063	0.0171804	0.205708	0.14194
KRE1	YNL322C	0.331656	0.00055983	-0.372672	0.247211		MNE1	YOR350C	-0.406325	0.0468489	-0.0261226	0.0180383
PRP2	YNR011C	0.285378	0.0325312	0.186861	0.0832904		SNF8	YPL002C	-0.38829	0.0279309	-0.0713838	0.0386936
PHO91	YNR013C	0.452031	9.47671e-06	-0.338712	0.340304		SWI1	YPL016W	-0.343082	0.00207894	-0.103318	0.0656254
ACC1	YNR016C	0.9535	2.53573e-27	0.00793582	0.0726867		SUV3	YPL029W	-0.434505	0.0102423	-0.0158459	0.00824199
	YNR021W	0.507979	3.87081e-09	0.258822	0.080462		SSN3	YPL042C	-0.421194	0.0134123	0.39875	0.405842
ZRG17	YNR039C	0.437539	0.00118141	-0.146765	0.0998166		ARL3	YPL051W	-0.546318	0.00226204	0.169795	0.221466
AGA1	YNR044W	1.01782	0.00635118	-0.00596921	0.0404261			YPL067C	-0.390318	0.00742245	0.292011	0.23999
SIN3	YOL004W	0.403435	0.000107754	-0.0566646	0.0303627		RPS9A	YPL081W	-0.586342	3.70881e-12	0.0346421	0.00797966
CSI2	YOL007C	0.963298	2.03959e-11	0.0763511	0.00824199		PNG1	YPL096W	-0.274167	0.0697094	0.0710594	0.0270068
PLB3	YOL011W	1.50026	7.36363e-05	-0.251991	0.13148		MSD1	YPL104W	-0.479475	0.00311353	-0.237513	0.073285
GAS5	YOL030W	0.165337	0.0463964	-0.222556	0.193001		ISU1	YPL135W	-1.18067	3.32207e-28	-0.16369	0.0699293
	YOL075C	0.330858	0.0704828	0.0556961	0.0938317		SPP1	YPL138C	-0.592574	0.000273836	-0.213673	0.0843212
ITR2	YOL103W	0.329758	0.0136723	0.134841	0.0192173			YPL150W	-0.318469	0.0528023	-0.0292032	0.00824199
SMF1	YOL122C	0.310533	0.00798092	0.0664945	0.0122793		BEM4	YPL161C	-0.393349	0.0117513	-0.123258	0.097935
BSC6	YOL137W	0.31704	0.0117037	-0.0728626	0.0270068		SPT14	YPL175W	-0.420053	0.00975561	0.0266596	0.0180383
RTC1	YOL138C	0.282964	0.0970062	-0.130527	0.0780703		CBC2	YPL178W	-0.226906	0.0226662	0.319605	0.189035
CTR9	YOL145C	0.245458	0.00938755	0.0636266	0.0755661		IPL1	YPL209C	-0.492179	0.00743792	0.0479513	NA
ALG6	YOR002W	0.995407	1.11891e-17	0.0598856	0.0831536		LEA1	YPL213W	-0.535682	0.000170691	-0.0139646	0.0465065
SLG1	YOR008C	0.201186	0.0674427	0.163626	0.0515866			YPL225W	-0.593351	6.4714e-12	0.378075	0.323489
RTS1	YOR014W	0.305017	0.00191466	-0.366648	0.303005		IQG1	YPL242C	-0.566634	3.93039e-08	-0.223353	0.0803544
RTS2	YOR077W	0.353427	0.0704788	-0.0556218	NA		ICY2	YPL250C	-2.14685	6.19907e-84	0.932897	1
TCB1	YOR086C	0.516586	4.84042e-07	-0.271081	0.214177		DIP5	YPL265W	-0.435497	1.57451e-07	0.0713988	0.0872026
	YOR093C	0.337886	0.0157359	0.024734	0.00824199		PBI1	YPL272C	-1.87836	0.000115715	0.0257417	NA
INP53	YOR109W	0.256175	0.00524919	-0.239927	0.224837			YPR010C-A	-0.647714	2.7725e-06	0.0828434	0.0755661
UBP2	YOR124C	0.343632	0.000200242	-0.144692	0.0268997		TIF6	YPR016C	-0.466512	5.61468e-09	-0.00386665	0.0670335
SMP3	YOR149C	0.791482	2.59504e-05	0.0358741	0.0175908		DSS4	YPR017C	-0.351026	0.0236601	0.0791254	0.0332466
RPB2	YOR151C	0.769687	7.06149e-20	0.166523	0.0196684		ATP20	YPR020W	-0.367448	0.009654	0.128198	0.074373
SEY1	YOR165W	0.264144	0.00322916	0.0296964	0.0114641		AGC1	YPR021C	-0.304388	0.0567546	-0.207125	0.0777024
MSB1	YOR188W	0.481976	0.000256795	-0.0941538	0.0333655		THP3	YPR045C	-0.679815	4.21053e-11	0.0393118	0.0437741
MCA1	YOR197W	0.517467	3.90965e-09	-0.0601024	0.0199648		ATG11	YPR049C	-0.318292	0.0687938	0.0103881	0.01451
BFR1	YOR198C	0.974655	1.72713e-36	-0.107949	0.0953168		NHP6A	YPR052C	-0.180725	0.053894	0.555691	0.863899
HIS3	YOR202W	0.433798	0.000456269	0.0490775	0.0121441		BRR1	YPR057W	-0.626889	0.000167736	-0.0622158	0.0500719
RPB10	YOR210W	0.441723	0.00061068	0.14808	0.0927018		RDS3	YPR094W	-0.73569	6.47661e-06	0.0721877	0.0411948
RUD3	YOR216C	0.330882	0.0409741	-0.053191	0.217178		SNT309	YPR101W	-0.314878	0.072602	0.115363	0.156274
ABP140	YOR239W	0.357097	0.0109256	0.0341746	0.043446		YTH1	YPR107C	-0.856885	2.1618e-10	-0.127882	0.053433
SRL1	YOR247W	1.59143	1.19141e-53	-0.0830088	0.0356542			YPR108W-A	-1.15347	0.0316374	1.35208	NA
TUM1	YOR251C	0.341229	0.000688968	0.184339	0.0785929			YPR109W	-0.436788	0.0296272	0.0203466	0.0111723
TRE2	YOR256C	0.234464	0.0889143	0.148082	0.0236157			YPR117W	-0.626062	0.0345507	-0.177135	0.0693238
	YOR296W	0.402184	0.0197719	-0.0405826	0.0193873		CLB5	YPR120C	-0.287295	0.0535893	0.19438	0.0876545
GNT1	YOR320C	0.50533	8.24517e-05	0.223083	0.0629567			YPR127W	-0.252424	0.0884896	0.140662	0.0397629
MYO2	YOR326W	0.414108	9.11455e-06	-0.0980773	0.0688892		URN1	YPR152C	-0.573347	0.000646719	0.266006	0.212538
KRE5	YOR336W	1.27651	2.19568e-33	0.0127143	0.0515866		PRP4	YPR178W	-0.602263	3.70993e-05	-0.164061	0.0496054
	YOR342C	0.324456	0.0196914	-0.246601	0.127469		ARR1	YPR199C	-0.501521	0.003179	-0.10973	0.0447539
CIN1	YOR349W	0.58306	0.00375106	-0.0329446	0.012808
GDS1	YOR355W	0.39229	0.000313133	-0.547085	0.833346
GPB1	YOR371C	0.663332	4.6357e-06	-0.209239	0.211223
NCR1	YPL006W	0.375299	0.000559622	-0.671662	0.943243
TAE2	YPL009C	0.47603	1.29892e-07	-0.49569	0.685513
RET3	YPL010W	0.177227	0.0465855	0.13583	0.0676682
HST2	YPL015C	0.390354	0.0112196	0.0562916	0.0455225
SVL3	YPL032C	0.387789	0.000259591	-0.0767746	0.0505618
	YPL034W	0.810484	0.0957807	-0.0413452	0.0587838
CAM1	YPL048W	0.160669	0.0653007	-0.300517	0.319002
DIG1	YPL049C	0.403009	0.000119608	-0.0417129	0.0180383
TIM50	YPL063W	0.345415	5.52378e-05	-0.212497	0.0317469
GPI2	YPL076W	0.569282	0.025398	-0.0147587	0.0579843
SEC16	YPL085W	0.692553	7.69942e-11	-0.508452	0.705501
PEX25	YPL112C	0.313324	0.00674322	0.178989	0.0241332
GIP3	YPL137C	0.382393	0.00211474	-0.0435997	0.0615293
	YPL162C	0.347207	0.0556959	0.145291	0.0500719
TRE1	YPL176C	0.211116	0.0809015	-0.0675046	0.0115904
POS5	YPL188W	0.456241	0.000108427	0.0298407	0.0112928
RPL7B	YPL198W	0.19691	0.0624003	0.172757	0.020175
FLC1	YPL221W	0.232074	0.0489425	-0.177761	0.0361728
MMT2	YPL224C	0.59207	0.000141886	-0.0190536	0.0163225
FAS2	YPL231W	0.47544	4.21198e-10	-0.268179	0.527367
CLN2	YPL256C	0.309004	0.0024973	0.0865168	0.0101104
MDL2	YPL270W	0.484624	0.000124376	-0.107626	0.023634
CMR3	YPR013C	0.764114	0.0106505	-0.275694	0.229087
EAF3	YPR023C	0.404766	0.000390335	-0.149672	0.0640495
MED1	YPR070W	0.422559	0.00554606	0.0588962	0.020175
NOT5	YPR072W	0.273255	0.0245893	0.0767898	0.0973856
DIB1	YPR082C	0.398079	0.0420456	0.113833	0.0303627
	YPR089W	0.26712	0.0228104	-0.0828257	0.0393984
NVJ2	YPR091C	0.394754	0.00076709	-0.166889	0.130534
SYT1	YPR095C	0.474401	0.00138898	-0.0356017	0.0192981
COG4	YPR105C	0.648137	1.32988e-06	0.0263913	0.0255249
	YPR114W	0.78392	3.1192e-11	0.119216	0.0379505
AXL1	YPR122W	0.346562	0.0100289	-0.0231492	0.0138287
SCD6	YPR129W	0.249009	0.011286	-0.216899	0.100686
RRP15	YPR143W	0.467209	0.000257266	-0.170227	0.311884
	YPR147C	0.252273	0.0803215	-0.276279	0.319813
SGV1	YPR161C	0.24113	0.0483772	0.112682	0.0420089
MMS1	YPR164W	1.03294	4.468e-12	-0.0162816	0.0535156
	YPR170W-B	0.251763	0.0433302	0.126044	0.0161041
SEC23	YPR181C	0.451589	5.85047e-08	-0.157443	0.18293
SMX3	YPR182W	0.252032	0.0913588	0.114426	0.053139
RPO26	YPR187W	0.183965	0.0439216	0.0910468	0.023953
SGE1	YPR198W	0.704739	2.5419e-09	-0.144441	0.0670147

## Sheet: (B)overlap Rib Profiling + CRAC
activated and bound by Dhh1			repressed and bound by Dhh1
Gene ID	associated gene name		Gene ID	associated gene name
YAL035W	FUN12		YAL051W	OAF1
YAR008W	SEN34		YAR042W	SWH1
YAR014C	BUD14		YBL002W	HTB2
YBL017C	PEP1		YBL033C	RIB1
YBL020W	RFT1		YBL041W	PRE7
YBL022C	PIM1		YBL050W	SEC17
YBL030C	PET9		YBR009C	HHF1
YBL079W	NUP170		YBR010W	HHT1
YBL091C	MAP2		YBR088C	POL30
YBL105C	PKC1		YBR089C-A	NHP6B
YBR011C	IPP1		YBR109C	CMD1
YBR015C	MNN2		YBR131W	CCZ1
YBR029C	CDS1		YBR153W	RIB7
YBR078W	ECM33		YBR265W	TSC10
YBR086C	IST2		YCL004W	PGS1
YBR127C	VMA2		YCR005C	CIT2
YBR158W	AMN1		YCR015C
YBR162C	TOS1		YCR028C-A	RIM1
YBR198C	TAF5		YCR077C	PAT1
YBR208C	DUR1,2		YDL039C	PRM7
YBR221C	PDB1		YDL057W
YBR235W	VHC1		YDL067C	COX9
YBR245C	ISW1		YDL088C	ASM4
YCL009C	ILV6		YDL225W	SHS1
YCL043C	PDI1		YDR047W	HEM12
YCR017C	CWH43		YDR050C	TPI1
YCR031C	RPS14A		YDR061W
YCR093W	CDC39		YDR067C	OCA6
YDL031W	DBP10		YDR121W	DPB4
YDL040C	NAT1		YDR208W	MSS4
YDL052C	SLC1		YDR224C	HTB1
YDL100C	GET3		YDR225W	HTA1
YDL102W	POL3		YDR265W	PEX10
YDL140C	RPO21		YDR306C
YDL145C	COP1		YDR345C	HXT3
YDL147W	RPN5		YDR386W	MUS81
YDL185W	VMA1		YDR520C	URC2
YDL195W	SEC31		YDR539W	FDC1
YDL226C	GCS1		YEL013W	VAC8
YDR033W	MRH1		YEL015W	EDC3
YDR038C	ENA5		YER013W	PRP22
YDR084C	TVP23		YER026C	CHO1
YDR086C	SSS1		YER064C	VHR2
YDR093W	DNF2		YER070W	RNR1
YDR127W	ARO1		YFL016C	MDJ1
YDR141C	DOP1		YFL027C	GYP8
YDR170C	SEC7		YFL031W	HAC1
YDR177W	UBC1		YFL034C-B	MOB2
YDR210W			YFR004W	RPN11
YDR349C	YPS7		YGL025C	PGD1
YDR367W	KEI1		YGL044C	RNA15
YDR407C	TRS120		YGL064C	MRH4
YDR432W	NPL3		YGL065C	ALG2
YDR443C	SSN2		YGL091C	NBP35
YDR456W	NHX1		YGL162W	SUT1
YDR500C	RPL37B		YGL166W	CUP2
YDR524C	AGE1		YGL210W	YPT32
YEL009C	GCN4		YGR017W
YEL043W			YGR020C	VMA7
YER008C	SEC3		YGR078C	PAC10
YER009W	NTF2		YGR165W	MRPS35
YER019C-A	SBH2		YGR167W	CLC1
YER023W	PRO3		YGR209C	TRX2
YER031C	YPT31		YGR271W	SLH1
YER069W	ARG5,6		YGR275W	RTT102
YER080W	AIM9		YHL019C	APM2
YER081W	SER3		YHL025W	SNF6
YER083C	GET2		YHL029C	OCA5
YER087C-B	SBH1		YHR009C	TDA3
YER089C	PTC2		YHR051W	COX6
YER114C	BOI2		YHR122W	CIA2
YER120W	SCS2		YHR165C	PRP8
YER122C	GLO3		YHR166C	CDC23
YER151C	UBP3		YHR167W	THP2
YER154W	OXA1		YIL048W	NEO1
YER165W	PAB1		YIL076W	SEC28
YER178W	PDA1		YIL108W
YFL037W	TUB2		YIR018W	YAP5
YFR032C-B			YJL026W	RNR2
YGL023C	PIB2		YJL029C	VPS53
YGL054C	ERV14		YJL053W	PEP8
YGL084C	GUP1		YJL060W	BNA3
YGL092W	NUP145		YJL143W	TIM17
YGL137W	SEC27		YJL149W	DAS1
YGL150C	INO80		YJL181W
YGL173C	XRN1		YJR005W	APL1
YGL189C	RPS26A		YJR052W	RAD7
YGL207W	SPT16		YJR088C	EMC2
YGL226C-A	OST5		YJR093C	FIP1
YGR007W	ECT1		YJR100C	AIM25
YGR014W	MSB2		YJR133W	XPT1
YGR027C	RPS25A		YKL016C	ATP7
YGR054W			YKL045W	PRI2
YGR060W	ERG25		YKL052C	ASK1
YGR170W	PSD2		YKL068W-A
YGR189C	CRH1		YKL089W	MIF2
YGR218W	CRM1		YKL112W	ABF1
YGR240C	PFK1		YKL186C	MTR2
YGR241C	YAP1802		YKL206C	ADD66
YGR251W	NOP19		YKR008W	RSC4
YGR279C	SCW4		YKR037C	SPC34
YHL003C	LAG1		YKR055W	RHO4
YHR013C	ARD1		YKR066C	CCP1
YHR042W	NCP1		YKR074W	AIM29
YHR047C	AAP1		YKR095W-A	PCC1
YHR056C	RSC30		YLL026W	HSP104
YHR073W	OSH3		YLL029W	FRA1
YHR074W	QNS1		YLL050C	COF1
YHR083W	SAM35		YLL060C	GTT2
YHR098C	SFB3		YLL063C	AYT1
YHR099W	TRA1		YLR049C
YHR108W	GGA2		YLR064W	PER33
YHR117W	TOM71		YLR094C	GIS3
YHR154W	RTT107		YLR098C	CHA4
YHR186C	KOG1		YLR113W	HOG1
YHR190W	ERG9		YLR166C	SEC10
YHR199C	AIM46		YLR256W	HAP1
YHR205W	SCH9		YLR274W	MCM5
YIL008W	URM1		YLR368W	MDM30
YIL074C	SER33		YLR396C	VPS33
YIL075C	RPN2		YLR457C	NBP1
YIL115C	NUP159		YML004C	GLO1
YIL123W	SIM1		YML027W	YOX1
YIL126W	STH1		YML035C	AMD1
YIL128W	MET18		YML058W	SML1
YIL133C	RPL16A		YML091C	RPM2
YIL137C	TMA108		YMR011W	HXT2
YIR023W	DAL81		YMR028W	TAP42
YJL005W	CYR1		YMR099C
YJL041W	NSP1		YMR121C	RPL15B
YJL061W	NUP82		YMR178W
YJL073W	JEM1		YMR216C	SKY1
YJL081C	ARP4		YMR240C	CUS1
YJL091C	GWT1		YNL004W	HRB1
YJL117W	PHO86		YNL030W	HHF2
YJL130C	URA2		YNL084C	END3
YJL154C	VPS35		YNL098C	RAS2
YJL174W	KRE9		YNL284C	MRPL10
YJL207C	LAA1		YNL312W	RFA2
YJR109C	CPA2		YNL317W	PFS2
YJR120W			YNR001C	CIT1
YJR147W	HMS2		YNR020C	ATP23
YKL043W	PHD1		YOL013W-A
YKL057C	NUP120		YOL017W	ESC8
YKL084W	HOT13		YOL044W	PEX15
YKL101W	HSL1		YOL068C	HST1
YKL156W	RPS27A		YOL105C	WSC3
YKL180W	RPL17A		YOL109W	ZEO1
YKL182W	FAS1		YOL126C	MDH2
YKL210W	UBA1		YOR037W	CYC2
YKR013W	PRY2		YOR043W	WHI2
YKR095W	MLP1		YOR047C	STD1
YLL006W	MMM1		YOR076C	SKI7
YLL014W	EMC6		YOR128C	ADE2
YLL018C	DPS1		YOR147W	MDM32
YLL031C	GPI13		YOR156C	NFI1
YLL048C	YBT1		YOR176W	HEM15
YLR001C			YOR233W	KIN4
YLR072W			YOR244W	ESA1
YLR096W	KIN2		YOR297C	TIM18
YLR106C	MDN1		YOR306C	MCH5
YLR115W	CFT2		YOR322C	LDB19
YLR172C	DPH5		YOR327C	SNC2
YLR185W	RPL37A		YOR344C	TYE7
YLR188W	MDL1		YPL016W	SWI1
YLR305C	STT4		YPL029W	SUV3
YLR342W	FKS1		YPL081W	RPS9A
YLR378C	SEC61		YPL096W	PNG1
YLR398C	SKI2		YPL104W	MSD1
YLR413W	INA1		YPL135W	ISU1
YLR426W	TDA5		YPL138C	SPP1
YLR430W	SEN1		YPL161C	BEM4
YLR432W	IMD3		YPL175W	SPT14
YLR448W	RPL6B		YPL225W
YML031W	NDC1		YPL250C	ICY2
YML072C	TCB3		YPL265W	DIP5
YML073C	RPL6A		YPR010C-A
YML103C	NUP188		YPR016C	TIF6
YMR012W	CLU1		YPR020W	ATP20
YMR080C	NAM7		YPR045C	THP3
YMR146C	TIF34		YPR052C	NHP6A
YMR173W	DDR48		YPR108W-A
YMR183C	SSO2		YPR120C	CLB5
YMR199W	CLN1
YMR200W	ROT1
YMR215W	GAS3
YMR218C	TRS130
YMR300C	ADE4
YMR310C
YNL041C	COG6
YNL045W	LAP2
YNL066W	SUN4
YNL085W	MKT1
YNL106C	INP52
YNL139C	THO2
YNL154C	YCK2
YNL189W	SRP1
YNL236W	SIN4
YNL241C	ZWF1
YNL262W	POL2
YNL287W	SEC21
YNL322C	KRE1
YNR011C	PRP2
YNR016C	ACC1
YNR021W
YOL004W	SIN3
YOL007C	CSI2
YOL011W	PLB3
YOL030W	GAS5
YOL145C	CTR9
YOR002W	ALG6
YOR086C	TCB1
YOR093C
YOR109W	INP53
YOR149C	SMP3
YOR151C	RPB2
YOR165W	SEY1
YOR197W	MCA1
YOR198C	BFR1
YOR202W	HIS3
YOR239W	ABP140
YOR247W	SRL1
YOR326W	MYO2
YPL006W	NCR1
YPL009C	TAE2
YPL010W	RET3
YPL032C	SVL3
YPL048W	CAM1
YPL063W	TIM50
YPL085W	SEC16
YPL137C	GIP3
YPL188W	POS5
YPL198W	RPL7B
YPL224C	MMT2
YPL231W	FAS2
YPL270W	MDL2
YPR129W	SCD6
YPR143W	RRP15
YPR147C
YPR161C	SGV1
YPR164W	MMS1
YPR170W-B
YPR181C	SEC23
YPR187W	RPO26
YPR198W	SGE1
