# Supplementary material for: A novel translational control mechanism involving RNA structures within coding sequences
Source: HighWire-hosted journal article supplement (doi:10.1101/gr.209015.116), 2016-11-07
Supplement: Supplemental_Table_2.xlsx [file Supplemental_Table_2.xlsx]

## Sheet: Hoja1
Supplemental Table S2: CRAC analysis. List of all genes bound by Dhh1, genes bound in the CDS, genes bound in the 5’UTR and genes bound in the 3’UTR.
all bound		bound in CDS		bound in 5'UTR		bound in 3'UTR
gene ID	associated gene name	gene ID	associated gene name	gene ID	associated gene name	gene ID	associated gene name
YAL001C	TFC3	YAL001C	TFC3	YAL012W	CYS3	YAL035W	FUN12
YAL005C	SSA1	YAL005C	SSA1	YAL023C	PMT2	YBL002W	HTB2
YAL012W	CYS3	YAL012W	CYS3	YAL025C	MAK16	YBL004W	UTP20
YAL015C	NTG1	YAL015C	NTG1	YAL030W	SNC1	YBL006C	LDB7
YAL016W	TPD3	YAL016W	TPD3	YAL035W	FUN12	YBL024W	NCL1
YAL023C	PMT2	YAL023C	PMT2	YAL041W	CDC24	YBL041W	PRE7
YAL025C	MAK16	YAL025C	MAK16	YAL044C	GCV3	YBL072C	RPS8A
YAL026C	DRS2	YAL026C	DRS2	YBL002W	HTB2	YBL076C	ILS1
YAL026C-A		YAL026C-A		YBL004W	UTP20	YBL087C	RPL23A
YAL030W	SNC1	YAL030W	SNC1	YBL006C	LDB7	YBR009C	HHF1
YAL035W	FUN12	YAL035W	FUN12	YBL022C	PIM1	YBR010W	HHT1
YAL038W	CDC19	YAL038W	CDC19	YBL024W	NCL1	YBR031W	RPL4A
YAL041W	CDC24	YAL041W	CDC24	YBL026W	LSM2	YBR048W	RPS11B
YAL043C	PTA1	YAL043C	PTA1	YBL033C	RIB1	YBR068C	BAP2
YAL044C	GCV3	YAL044C	GCV3	YBL037W	APL3	YBR090C
YAL051W	OAF1	YAL051W	OAF1	YBL041W	PRE7	YBR092C	PHO3
YAL053W	FLC2	YAL053W	FLC2	YBL047C	EDE1	YBR143C	SUP45
YAR008W	SEN34	YAR008W	SEN34	YBL058W	SHP1	YBR286W	APE3
YAR014C	BUD14	YAR014C	BUD14	YBL071C-B		YCL040W	GLK1
YAR028W		YAR028W		YBL072C	RPS8A	YCL041C
YAR033W	MST28	YAR033W	MST28	YBL076C	ILS1	YCL042W
YAR035W	YAT1	YAR035W	YAT1	YBL087C	RPL23A	YCL043C	PDI1
YAR042W	SWH1	YAR042W	SWH1	YBL103C	RTG3	YCL045C	EMC1
YAR071W	PHO11	YAR071W	PHO11	YBL105C	PKC1	YCL064C	CHA1
YBL001C	ECM15	YBL001C	ECM15	YBR008C	FLR1	YCR004C	YCP4
YBL002W	HTB2	YBL002W	HTB2	YBR009C	HHF1	YCR005C	CIT2
YBL004W	UTP20	YBL004W	UTP20	YBR010W	HHT1	YCR012W	PGK1
YBL005W	PDR3	YBL005W	PDR3	YBR011C	IPP1	YCR093W	CDC39
YBL006C	LDB7	YBL006C	LDB7	YBR014C	GRX7	YDL022W	GPD1
YBL007C	SLA1	YBL007C	SLA1	YBR016W		YDL075W	RPL31A
YBL014C	RRN6	YBL014C	RRN6	YBR025C	OLA1	YDL081C	RPP1A
YBL017C	PEP1	YBL017C	PEP1	YBR031W	RPL4A	YDL097C	RPN6
YBL020W	RFT1	YBL020W	RFT1	YBR035C	PDX3	YDL130W	RPP1B
YBL022C	PIM1	YBL022C	PIM1	YBR038W	CHS2	YDL229W	SSB1
YBL024W	NCL1	YBL024W	NCL1	YBR048W	RPS11B	YDR012W	RPL4B
YBL026W	LSM2	YBL026W	LSM2	YBR052C	RFS1	YDR019C	GCV1
YBL027W	RPL19B	YBL027W	RPL19B	YBR056W		YDR023W	SES1
YBL030C	PET9	YBL030C	PET9	YBR059C	AKL1	YDR024W	FYV1
YBL032W	HEK2	YBL032W	HEK2	YBR067C	TIP1	YDR025W	RPS11A
YBL033C	RIB1	YBL033C	RIB1	YBR068C	BAP2	YDR055W	PST1
YBL036C		YBL036C		YBR069C	TAT1	YDR064W	RPS13
YBL037W	APL3	YBL037W	APL3	YBR072W	HSP26	YDR077W	SED1
YBL039C	URA7	YBL039C	URA7	YBR079C	RPG1	YDR133C
YBL041W	PRE7	YBL041W	PRE7	YBR084W	MIS1	YDR154C
YBL047C	EDE1	YBL047C	EDE1	YBR085C-A		YDR155C	CPR1
YBL050W	SEC17	YBL050W	SEC17	YBR089C-A	NHP6B	YDR157W
YBL055C		YBL055C		YBR090C		YDR158W	HOM2
YBL058W	SHP1	YBL058W	SHP1	YBR092C	PHO3	YDR172W	SUP35
YBL060W	YEL1	YBL060W	YEL1	YBR104W	YMC2	YDR224C	HTB1
YBL066C	SEF1	YBL066C	SEF1	YBR106W	PHO88	YDR225W	HTA1
YBL068W	PRS4	YBL068W	PRS4	YBR109C	CMD1	YDR226W	ADK1
YBL071C-B		YBL071C-B		YBR111C	YSA1	YDR331W	GPI8
YBL072C	RPS8A	YBL072C	RPS8A	YBR111W-A	SUS1	YDR341C
YBL076C	ILS1	YBL076C	ILS1	YBR126C	TPS1	YDR353W	TRR1
YBL079W	NUP170	YBL079W	NUP170	YBR126W-A		YDR382W	RPP2B
YBL082C	ALG3	YBL082C	ALG3	YBR142W	MAK5	YDR450W	RPS18A
YBL083C		YBL083C		YBR143C	SUP45	YDR463W	STP1
YBL084C	CDC27	YBL084C	CDC27	YBR153W	RIB7	YDR471W	RPL27B
YBL087C	RPL23A	YBL087C	RPL23A	YBR154C	RPB5	YDR496C	PUF6
YBL091C	MAP2	YBL091C	MAP2	YBR171W	SEC66	YDR524C-B
YBL093C	ROX3	YBL093C	ROX3	YBR173C	UMP1	YEL007W	MIT1
YBL099W	ATP1	YBL099W	ATP1	YBR194W	AIM4	YEL009C	GCN4
YBL102W	SFT2	YBL102W	SFT2	YBR196C	PGI1	YEL026W	SNU13
YBL103C	RTG3	YBL103C	RTG3	YBR198C	TAF5	YEL065W	SIT1
YBL105C	PKC1	YBL105C	PKC1	YBR208C	DUR1,2	YEL071W	DLD3
YBR008C	FLR1	YBR008C	FLR1	YBR234C	ARC40	YER006W	NUG1
YBR009C	HHF1	YBR009C	HHF1	YBR244W	GPX2	YER025W	GCD11
YBR010W	HHT1	YBR010W	HHT1	YBR248C	HIS7	YER043C	SAH1
YBR011C	IPP1	YBR011C	IPP1	YBR249C	ARO4	YER044C	ERG28
YBR014C	GRX7	YBR014C	GRX7	YBR262C	MIC12	YER072W	VTC1
YBR015C	MNN2	YBR015C	MNN2	YBR269C	SDH8	YER102W	RPS8B
YBR016W		YBR016W		YBR283C	SSH1	YER117W	RPL23B
YBR017C	KAP104	YBR017C	KAP104	YBR286W	APE3	YER177W	BMH1
YBR025C	OLA1	YBR025C	OLA1	YBR290W	BSD2	YFL031W	HAC1
YBR029C	CDS1	YBR029C	CDS1	YCL001W	RER1	YFL032W
YBR031W	RPL4A	YBR031W	RPL4A	YCL009C	ILV6	YFL034C-A	RPL22B
YBR035C	PDX3	YBR035C	PDX3	YCL017C	NFS1	YFR032C-A	RPL29
YBR036C	CSG2	YBR036C	CSG2	YCL032W	STE50	YFR032C-B
YBR037C	SCO1	YBR037C	SCO1	YCL040W	GLK1	YFR053C	HXK1
YBR038W	CHS2	YBR038W	CHS2	YCL041C		YGL008C	PMA1
YBR039W	ATP3	YBR039W	ATP3	YCL042W		YGL009C	LEU1
YBR040W	FIG1	YBR040W	FIG1	YCL043C	PDI1	YGL011C	SCL1
YBR044C	TCM62	YBR044C	TCM62	YCL045C	EMC1	YGL031C	RPL24A
YBR048W	RPS11B	YBR048W	RPS11B	YCL057C-A	MIC10	YGL055W	OLE1
YBR052C	RFS1	YBR052C	RFS1	YCL059C	KRR1	YGL092W	NUP145
YBR056W		YBR056W		YCL064C	CHA1	YGL103W	RPL28
YBR059C	AKL1	YBR059C	AKL1	YCR004C	YCP4	YGL105W	ARC1
YBR061C	TRM7	YBR061C	TRM7	YCR005C	CIT2	YGL123W	RPS2
YBR067C	TIP1	YBR067C	TIP1	YCR012W	PGK1	YGL135W	RPL1B
YBR068C	BAP2	YBR068C	BAP2	YCR015C		YGL148W	ARO2
YBR069C	TAT1	YBR069C	TAT1	YCR017C	CWH43	YGL189C	RPS26A
YBR072W	HSP26	YBR072W	HSP26	YCR020W-B	HTL1	YGL253W	HXK2
YBR078W	ECM33	YBR078W	ECM33	YCR028C-A	RIM1	YGR014W	MSB2
YBR079C	RPG1	YBR079C	RPG1	YCR034W	ELO2	YGR027C	RPS25A
YBR082C	UBC4	YBR082C	UBC4	YCR046C	IMG1	YGR034W	RPL26B
YBR084C-A	RPL19A	YBR084C-A	RPL19A	YCR072C	RSA4	YGR055W	MUP1
YBR084W	MIS1	YBR084W	MIS1	YCR088W	ABP1	YGR085C	RPL11B
YBR085C-A		YBR085C-A		YCR093W	CDC39	YGR155W	CYS4
YBR086C	IST2	YBR086C	IST2	YDL004W	ATP16	YGR162W	TIF4631
YBR088C	POL30	YBR088C	POL30	YDL022W	GPD1	YGR175C	ERG1
YBR089C-A	NHP6B	YBR089C-A	NHP6B	YDL040C	NAT1	YGR185C	TYS1
YBR090C		YBR090C		YDL051W	LHP1	YGR189C	CRH1
YBR091C	TIM12	YBR091C	TIM12	YDL067C	COX9	YGR208W	SER2
YBR092C	PHO3	YBR092C	PHO3	YDL075W	RPL31A	YGR209C	TRX2
YBR093C	PHO5	YBR093C	PHO5	YDL078C	MDH3	YGR214W	RPS0A
YBR097W	VPS15	YBR097W	VPS15	YDL081C	RPP1A	YGR240C	PFK1
YBR104W	YMC2	YBR104W	YMC2	YDL097C	RPN6	YGR254W	ENO1
YBR106W	PHO88	YBR106W	PHO88	YDL100C	GET3	YGR285C	ZUO1
YBR109C	CMD1	YBR109C	CMD1	YDL101C	DUN1	YHL001W	RPL14B
YBR109W-A		YBR109W-A		YDL102W	POL3	YHL033C	RPL8A
YBR111C	YSA1	YBR111C	YSA1	YDL110C	TMA17	YHR005C-A	TIM10
YBR111W-A	SUS1	YBR111W-A	SUS1	YDL112W	TRM3	YHR010W	RPL27A
YBR121C	GRS1	YBR121C	GRS1	YDL126C	CDC48	YHR027C	RPN1
YBR126C	TPS1	YBR126C	TPS1	YDL130W	RPP1B	YHR064C	SSZ1
YBR126W-A		YBR126W-A		YDL148C	NOP14	YHR068W	DYS1
YBR127C	VMA2	YBR127C	VMA2	YDL177C		YHR071W	PCL5
YBR130C	SHE3	YBR130C	SHE3	YDL182W	LYS20	YHR072W-A	NOP10
YBR131W	CCZ1	YBR131W	CCZ1	YDL192W	ARF1	YHR094C	HXT1
YBR140C	IRA1	YBR140C	IRA1	YDL195W	SEC31	YHR147C	MRPL6
YBR142W	MAK5	YBR142W	MAK5	YDL201W	TRM8	YHR183W	GND1
YBR143C	SUP45	YBR143C	SUP45	YDL208W	NHP2	YHR193C	EGD2
YBR148W	YSW1	YBR148W	YSW1	YDL219W	DTD1	YIL051C	MMF1
YBR150C	TBS1	YBR150C	TBS1	YDL229W	SSB1	YIL052C	RPL34B
YBR153W	RIB7	YBR153W	RIB7	YDL234C	GYP7	YIL053W	GPP1
YBR154C	RPB5	YBR154C	RPB5	YDR012W	RPL4B	YIL075C	RPN2
YBR158W	AMN1	YBR158W	AMN1	YDR019C	GCV1	YIL133C	RPL16A
YBR159W	IFA38	YBR159W	IFA38	YDR023W	SES1	YIL156W-B
YBR162C	TOS1	YBR162C	TOS1	YDR024W	FYV1	YJL012C	VTC4
YBR171W	SEC66	YBR171W	SEC66	YDR025W	RPS11A	YJL159W	HSP150
YBR173C	UMP1	YBR173C	UMP1	YDR032C	PST2	YJL177W	RPL17B
YBR176W	ECM31	YBR176W	ECM31	YDR033W	MRH1	YJL190C	RPS22A
YBR179C	FZO1	YBR179C	FZO1	YDR035W	ARO3	YJR045C	SSC1
YBR181C	RPS6B	YBR181C	RPS6B	YDR037W	KRS1	YJR048W	CYC1
YBR189W	RPS9B	YBR189W	RPS9B	YDR046C	BAP3	YJR064W	CCT5
YBR190W		YBR190W		YDR050C	TPI1	YJR085C
YBR191W	RPL21A	YBR191W	RPL21A	YDR054C	CDC34	YJR104C	SOD1
YBR191W-A		YBR191W-A		YDR055W	PST1	YJR123W	RPS5
YBR194W	AIM4	YBR194W	AIM4	YDR056C		YKL034W	TUL1
YBR195C	MSI1	YBR195C	MSI1	YDR064W	RPS13	YKL054C	DEF1
YBR196C	PGI1	YBR196C	PGI1	YDR067C	OCA6	YKL152C	GPM1
YBR198C	TAF5	YBR198C	TAF5	YDR071C	PAA1	YKL164C	PIR1
YBR208C	DUR1,2	YBR208C	DUR1,2	YDR074W	TPS2	YKL180W	RPL17A
YBR212W	NGR1	YBR212W	NGR1	YDR075W	PPH3	YKL210W	UBA1
YBR218C	PYC2	YBR218C	PYC2	YDR077W	SED1	YKR048C	NAP1
YBR219C		YBR221C	PDB1	YDR084C	TVP23	YKR056W	TRM2
YBR221C	PDB1	YBR226C		YDR088C	SLU7	YLL024C	SSA2
YBR226C		YBR234C	ARC40	YDR091C	RLI1	YLR027C	AAT2
YBR234C	ARC40	YBR235W	VHC1	YDR101C	ARX1	YLR029C	RPL15A
YBR235W	VHC1	YBR238C		YDR116C	MRPL1	YLR043C	TRX1
YBR238C		YBR244W	GPX2	YDR119W	VBA4	YLR075W	RPL10
YBR244W	GPX2	YBR245C	ISW1	YDR121W	DPB4	YLR109W	AHP1
YBR245C	ISW1	YBR248C	HIS7	YDR127W	ARO1	YLR180W	SAM1
YBR248C	HIS7	YBR249C	ARO4	YDR129C	SAC6	YLR193C	UPS1
YBR249C	ARO4	YBR251W	MRPS5	YDR132C		YLR216C	CPR6
YBR251W	MRPS5	YBR258C	SHG1	YDR133C		YLR244C	MAP1
YBR258C	SHG1	YBR262C	MIC12	YDR141C	DOP1	YLR293C	GSP1
YBR262C	MIC12	YBR265W	TSC10	YDR143C	SAN1	YLR304C	ACO1
YBR265W	TSC10	YBR267W	REI1	YDR148C	KGD2	YLR325C	RPL38
YBR267W	REI1	YBR269C	SDH8	YDR154C		YLR333C	RPS25B
YBR269C	SDH8	YBR276C	PPS1	YDR155C	CPR1	YLR340W	RPP0
YBR276C	PPS1	YBR279W	PAF1	YDR157W		YLR342W	FKS1
YBR279W	PAF1	YBR283C	SSH1	YDR158W	HOM2	YLR355C	ILV5
YBR283C	SSH1	YBR286W	APE3	YDR159W	SAC3	YLR359W	ADE13
YBR286W	APE3	YBR290W	BSD2	YDR171W	HSP42	YLR388W	RPS29A
YBR290W	BSD2	YCL001W	RER1	YDR172W	SUP35	YLR406C	RPL31B
YCL001W	RER1	YCL002C		YDR175C	RSM24	YLR410W	VIP1
YCL002C		YCL004W	PGS1	YDR184C	ATC1	YLR432W	IMD3
YCL004W	PGS1	YCL009C	ILV6	YDR205W	MSC2	YLR441C	RPS1A
YCL009C	ILV6	YCL010C	SGF29	YDR210W		YML026C	RPS18B
YCL010C	SGF29	YCL017C	NFS1	YDR224C	HTB1	YML028W	TSA1
YCL017C	NFS1	YCL028W	RNQ1	YDR225W	HTA1	YML056C	IMD4
YCL028W	RNQ1	YCL030C	HIS4	YDR226W	ADK1	YML058W	SML1
YCL030C	HIS4	YCL032W	STE50	YDR233C	RTN1	YML063W	RPS1B
YCL032W	STE50	YCL037C	SRO9	YDR238C	SEC26	YMR015C	ERG5
YCL037C	SRO9	YCL039W	GID7	YDR257C	RKM4	YMR049C	ERB1
YCL039W	GID7	YCL040W	GLK1	YDR280W	RRP45	YMR058W	FET3
YCL040W	GLK1	YCL041C		YDR287W	INM2	YMR083W	ADH3
YCL041C		YCL042W		YDR304C	CPR5	YMR099C
YCL042W		YCL043C	PDI1	YDR308C	SRB7	YMR122W-A
YCL043C	PDI1	YCL045C	EMC1	YDR331W	GPI8	YMR146C	TIF34
YCL045C	EMC1	YCL056C	PEX34	YDR341C		YMR173W	DDR48
YCL056C	PEX34	YCL057C-A	MIC10	YDR345C	HXT3	YMR186W	HSC82
YCL057C-A	MIC10	YCL058C	FYV5	YDR346C	SVF1	YMR202W	ERG2
YCL058C	FYV5	YCL058W-A	ADF1	YDR353W	TRR1	YMR217W	GUA1
YCL058W-A	ADF1	YCL059C	KRR1	YDR368W	YPR1	YMR230W	RPS10B
YCL059C	KRR1	YCL064C	CHA1	YDR380W	ARO10	YMR260C	TIF11
YCL064C	CHA1	YCR004C	YCP4	YDR382W	RPP2B	YMR291W	TDA1
YCR004C	YCP4	YCR005C	CIT2	YDR385W	EFT2	YMR303C	ADH2
YCR005C	CIT2	YCR008W	SAT4	YDR398W	UTP5	YMR305C	SCW10
YCR008W	SAT4	YCR012W	PGK1	YDR399W	HPT1	YMR307W	GAS1
YCR012W	PGK1	YCR015C		YDR414C	ERD1	YMR309C	NIP1
YCR015C		YCR017C	CWH43	YDR427W	RPN9	YNL016W	PUB1
YCR017C	CWH43	YCR018C	SRD1	YKL063C		YNL030W	HHF2
YCR018C	SRD1	YCR020W-B	HTL1	YKR014C	YPT52	YNL031C	HHT2
YCR020W-B	HTL1	YCR023C		YDR450W	RPS18A	YNL066W	SUN4
YCR023C		YCR024C-B		YDR457W	TOM1	YNL069C	RPL16B
YCR024C-B		YCR028C-A	RIM1	YDR463W	STP1	YNL096C	RPS7B
YCR028C-A	RIM1	YCR030C	SYP1	YDR471W	RPL27B	YNL141W	AAH1
YCR030C	SYP1	YCR031C	RPS14A	YDR496C	PUF6	YNL145W	MFA2
YCR031C	RPS14A	YCR033W	SNT1	YDR502C	SAM2	YNL149C	PGA2
YCR033W	SNT1	YCR034W	ELO2	YDR508C	GNP1	YNL178W	RPS3
YCR034W	ELO2	YCR035C	RRP43	YDR524C	AGE1	YNL182C	IPI3
YCR035C	RRP43	YCR036W	RBK1	YDR524C-B		YNL189W	SRP1
YCR036W	RBK1	YCR042C	TAF2	YDR525W-A	SNA2	YNL302C	RPS19B
YCR042C	TAF2	YCR046C	IMG1	YEL002C	WBP1	YNL327W	EGT2
YCR046C	IMG1	YCR048W	ARE1	YEL007W	MIT1	YNR046W	TRM112
YCR048W	ARE1	YCR053W	THR4	YEL009C	GCN4	YOL038W	PRE6
YCR053W	THR4	YCR065W	HCM1	YEL015W	EDC3	YOL039W	RPP2A
YCR065W	HCM1	YCR072C	RSA4	YEL026W	SNU13	YOL109W	ZEO1
YCR072C	RSA4	YCR077C	PAT1	YEL027W	VMA3	YOL127W	RPL25
YCR077C	PAT1	YCR087W		YEL065W	SIT1	YOL139C	CDC33
YCR087W		YCR088W	ABP1	YEL071W	DLD3	YOR078W	BUD21
YCR088W	ABP1	YCR093W	CDC39	YER006W	NUG1	YOR096W	RPS7A
YCR093W	CDC39	YDL004W	ATP16	YER009W	NTF2	YOR133W	EFT1
YDL004W	ATP16	YDL005C	MED2	YER011W	TIR1	YOR153W	PDR5
YDL005C	MED2	YDL007W	RPT2	YER021W	RPN3	YOR202W	HIS3
YDL007W	RPT2	YDL014W	NOP1	YER023W	PRO3	YOR203W
YDL014W	NOP1	YDL016C		YER025W	GCD11	YOR204W	DED1
YDL016C		YDL019C	OSH2	YER026C	CHO1	YOR293W	RPS10A
YDL019C	OSH2	YDL022W	GPD1	YER042W	MXR1	YOR298C-A	MBF1
YDL022W	GPD1	YDL031W	DBP10	YER043C	SAH1	YOR369C	RPS12
YDL031W	DBP10	YDL035C	GPR1	YER044C	ERG28	YOR382W	FIT2
YDL035C	GPR1	YDL037C	BSC1	YER049W	TPA1	YOR383C	FIT3
YDL037C	BSC1	YDL039C	PRM7	YER055C	HIS1	YPL012W	RRP12
YDL039C	PRM7	YDL040C	NAT1	YER056C	FCY2	YPL037C	EGD1
YDL040C	NAT1	YDL042C	SIR2	YER062C	GPP2	YPL061W	ALD6
YDL042C	SIR2	YDL046W	NPC2	YER070W	RNR1	YKL127W	PGM1
YDL046W	NPC2	YDL051W	LHP1	YER072W	VTC1	YKR055W	RHO4
YDL051W	LHP1	YDL052C	SLC1	YER073W	ALD5	YPL135W	ISU1
YDL052C	SLC1	YDL057W		YER081W	SER3	YPL143W	RPL33A
YDL057W		YDL066W	IDP1	YER082C	UTP7	YPL154C	PEP4
YDL066W	IDP1	YDL067C	COX9	YER086W	ILV1	YPL198W	RPL7B
YDL067C	COX9	YDL070W	BDF2	YER087C-B	SBH1	YPL220W	RPL1A
YDL070W	BDF2	YDL074C	BRE1	YER089C	PTC2	YPL231W	FAS2
YDL074C	BRE1	YDL075W	RPL31A	YER102W	RPS8B	YPL250C	ICY2
YDL075W	RPL31A	YDL078C	MDH3	YER110C	KAP123	YPL268W	PLC1
YDL078C	MDH3	YDL081C	RPP1A	YER117W	RPL23B	YPL274W	SAM3
YDL081C	RPP1A	YDL082W	RPL13A	YER120W	SCS2	YPR102C	RPL11A
YDL082W	RPL13A	YDL083C	RPS16B	YER124C	DSE1	YPR108W	RPN7
YDL083C	RPS16B	YDL084W	SUB2	YER126C	NSA2	YPR132W	RPS23B
YDL084W	SUB2	YDL088C	ASM4	YER127W	LCP5	YPR149W	NCE102
YDL088C	ASM4	YDL095W	PMT1	YER133W	GLC7	YPR183W	DPM1
YDL095W	PMT1	YDL097C	RPN6	YER150W	SPI1	YAL015C	NTG1
YDL097C	RPN6	YDL100C	GET3	YER151C	UBP3	YAL016W	TPD3
YDL100C	GET3	YDL101C	DUN1	YER157W	COG3	YAL026C	DRS2
YDL101C	DUN1	YDL102W	POL3	YER161C	SPT2	YAL026C-A
YDL102W	POL3	YDL104C	QRI7	YER168C	CCA1	YAL038W	CDC19
YDL104C	QRI7	YDL110C	TMA17	YER172C	BRR2	YAL051W	OAF1
YDL110C	TMA17	YDL112W	TRM3	YER177W	BMH1	YAL053W	FLC2
YDL112W	TRM3	YDL116W	NUP84	YFL002C	SPB4	YAR014C	BUD14
YDL116W	NUP84	YDL126C	CDC48	YFL014W	HSP12	YAR071W	PHO11
YDL126C	CDC48	YDL127W	PCL2	YFL018C	LPD1	YBL007C	SLA1
YDL127W	PCL2	YDL128W	VCX1	YFL028C	CAF16	YBL027W	RPL19B
YDL128W	VCX1	YDL130W	RPP1B	YFL031W	HAC1	YBL030C	PET9
YDL130W	RPP1B	YDL131W	LYS21	YFL032W		YBL039C	URA7
YDL131W	LYS21	YDL132W	CDC53	YFL034C-A	RPL22B	YBL050W	SEC17
YDL132W	CDC53	YDL136W	RPL35B	YFL034C-B	MOB2	YBL099W	ATP1
YDL136W	RPL35B	YDL140C	RPO21	YFL045C	SEC53	YBL102W	SFT2
YDL140C	RPO21	YDL143W	CCT4	YFR004W	RPN11	YBR029C	CDS1
YDL143W	CCT4	YDL144C		YFR009W	GCN20	YBR036C	CSG2
YDL144C		YDL145C	COP1	YFR019W	FAB1	YBR061C	TRM7
YDL145C	COP1	YDL147W	RPN5	YFR028C	CDC14	YBR082C	UBC4
YDL147W	RPN5	YDL148C	NOP14	YFR032C-A	RPL29	YBR084C-A	RPL19A
YDL148C	NOP14	YDL157C		YFR032C-B		YBR088C	POL30
YDL157C		YDL158C		YFR044C	DUG1	YBR091C	TIM12
YDL158C		YDL171C	GLT1	YFR047C	BNA6	YBR121C	GRS1
YDL171C	GLT1	YDL172C		YFR050C	PRE4	YBR150C	TBS1
YDL172C		YDL177C		YFR051C	RET2	YBR158W	AMN1
YDL177C		YDL180W		YFR053C	HXK1	YBR159W	IFA38
YDL180W		YDL182W	LYS20	YGL003C	CDH1	YBR162C	TOS1
YDL182W	LYS20	YDL185W	VMA1	YGL008C	PMA1	YBR181C	RPS6B
YDL185W	VMA1	YDL190C	UFD2	YGL009C	LEU1	YBR189W	RPS9B
YDL190C	UFD2	YDL191W	RPL35A	YGL011C	SCL1	YBR191W	RPL21A
YDL191W	RPL35A	YDL192W	ARF1	YGL012W	ERG4	YBR191W-A
YDL192W	ARF1	YDL195W	SEC31	YGL026C	TRP5	YBR218C	PYC2
YDL195W	SEC31	YDL198C	GGC1	YGL031C	RPL24A	YBR219C
YDL198C	GGC1	YDL201W	TRM8	YGL048C	RPT6	YBR226C
YDL201W	TRM8	YDL202W	MRPL11	YGL054C	ERV14	YBR279W	PAF1
YDL202W	MRPL11	YDL208W	NHP2	YGL055W	OLE1	YCL028W	RNQ1
YDL208W	NHP2	YDL211C		YGL056C	SDS23	YCL030C	HIS4
YDL211C		YDL218W		YGL062W	PYC1	YCL056C	PEX34
YDL218W		YDL219W	DTD1	YGL068W	MNP1	YCL058C	FYV5
YDL219W	DTD1	YDL224C	WHI4	YGL076C	RPL7A	YCL058W-A	ADF1
YDL224C	WHI4	YDL225W	SHS1	YGL084C	GUP1	YCR024C-B
YDL225W	SHS1	YDL226C	GCS1	YGL092W	NUP145	YCR031C	RPS14A
YDL226C	GCS1	YDL227C	HO	YGL099W	LSG1	YCR077C	PAT1
YDL227C	HO	YDL229W	SSB1	YGL103W	RPL28	YDL014W	NOP1
YDL229W	SSB1	YDL234C	GYP7	YGL105W	ARC1	YDL016C
YDL234C	GYP7	YDR011W	SNQ2	YGL106W	MLC1	YDL039C	PRM7
YDR011W	SNQ2	YDR012W	RPL4B	YGL117W		YDL052C	SLC1
YDR012W	RPL4B	YDR017C	KCS1	YGL120C	PRP43	YDL066W	IDP1
YDR017C	KCS1	YDR019C	GCV1	YGL123W	RPS2	YDL082W	RPL13A
YDR019C	GCV1	YDR022C	ATG31	YGL135W	RPL1B	YDL083C	RPS16B
YDR022C	ATG31	YDR023W	SES1	YGL148W	ARO2	YDL104C	QRI7
YDR023W	SES1	YDR024W	FYV1	YGL151W	NUT1	YDL131W	LYS21
YDR024W	FYV1	YDR025W	RPS11A	YGL159W		YDL136W	RPL35B
YDR025W	RPS11A	YDR032C	PST2	YGL169W	SUA5	YDL140C	RPO21
YDR032C	PST2	YDR033W	MRH1	YGL189C	RPS26A	YDL143W	CCT4
YDR033W	MRH1	YDR035W	ARO3	YGL195W	GCN1	YDL147W	RPN5
YDR035W	ARO3	YDR036C	EHD3	YGL202W	ARO8	YDL158C
YDR036C	EHD3	YDR037W	KRS1	YGL210W	YPT32	YDL185W	VMA1
YDR037W	KRS1	YDR038C	ENA5	YGL225W	VRG4	YDL191W	RPL35A
YDR038C	ENA5	YDR039C	ENA2	YGL234W	ADE5,7	YDL198C	GGC1
YDR039C	ENA2	YDR040C	ENA1	YGL245W	GUS1	YDR011W	SNQ2
YDR040C	ENA1	YDR044W	HEM13	YGL253W	HXK2	YDR044W	HEM13
YDR044W	HEM13	YDR046C	BAP3	YGR014W	MSB2	YDR060W	MAK21
YDR046C	BAP3	YDR047W	HEM12	YGR017W		YDR086C	SSS1
YDR047W	HEM12	YDR049W	VMS1	YGR020C	VMA7	YDR087C	RRP1
YDR049W	VMS1	YDR050C	TPI1	YGR027C	RPS25A	YDR103W	STE5
YDR050C	TPI1	YDR052C	DBF4	YGR034W	RPL26B	YDR144C	MKC7
YDR052C	DBF4	YDR054C	CDC34	YGR055W	MUP1	YDR150W	NUM1
YDR054C	CDC34	YDR055W	PST1	YGR061C	ADE6	YDR156W	RPA14
YDR055W	PST1	YDR056C		YGR085C	RPL11B	YDR166C	SEC5
YDR056C		YDR060W	MAK21	YGR086C	PIL1	YDR176W	NGG1
YDR060W	MAK21	YDR061W		YGR101W	PCP1	YDR177W	UBC1
YDR061W		YDR064W	RPS13	YGR103W	NOP7	YDR182W-A
YDR064W	RPS13	YDR067C	OCA6	YGR118W	RPS23A	YDR183C-A
YDR067C	OCA6	YDR069C	DOA4	YGR123C	PPT1	YDR190C	RVB1
YDR069C	DOA4	YDR071C	PAA1	YGR124W	ASN2	YDR217C	RAD9
YDR071C	PAA1	YDR072C	IPT1	YGR155W	CYS4	YDR294C	DPL1
YDR072C	IPT1	YDR073W	SNF11	YGR162W	TIF4631	YDR300C	PRO1
YDR073W	SNF11	YDR074W	TPS2	YGR165W	MRPS35	YDR320W-B
YDR074W	TPS2	YDR075W	PPH3	YGR173W	RBG2	YDR334W	SWR1
YDR075W	PPH3	YDR077W	SED1	YGR175C	ERG1	YDR342C	HXT7
YDR077W	SED1	YDR082W	STN1	YGR180C	RNR4	YDR367W	KEI1
YDR082W	STN1	YDR084C	TVP23	YGR185C	TYS1	YDR370C	DXO1
YDR084C	TVP23	YDR086C	SSS1	YGR187C	HGH1	YDR394W	RPT3
YDR086C	SSS1	YDR087C	RRP1	YGR189C	CRH1	YDR401W
YDR087C	RRP1	YDR088C	SLU7	YGR195W	SKI6	YDR410C	STE14
YDR088C	SLU7	YDR091C	RLI1	YGR204W	ADE3	YDR418W	RPL12B
YDR091C	RLI1	YDR093W	DNF2	YGR208W	SER2	YDR429C	TIF35
YDR093W	DNF2	YDR094W		YGR209C	TRX2	YKL007W	CAP1
YDR094W		YDR096W	GIS1	YGR211W	ZPR1	YKL015W	PUT3
YDR096W	GIS1	YDR098C	GRX3	YGR214W	RPS0A	YKL019W	RAM2
YDR098C	GRX3	YDR101C	ARX1	YGR215W	RSM27	YKL021C	MAK11
YDR101C	ARX1	YDR103W	STE5	YGR217W	CCH1	YKL023W
YDR103W	STE5	YDR110W	FOB1	YGR218W	CRM1	YKL025C	PAN3
YDR110W	FOB1	YDR115W		YGR231C	PHB2	YKL026C	GPX1
YDR115W		YDR116C	MRPL1	YGR232W	NAS6	YKL028W	TFA1
YDR116C	MRPL1	YDR119W	VBA4	YGR234W	YHB1	YKL039W	PTM1
YDR119W	VBA4	YDR121W	DPB4	YGR239C	PEX21	YKL045W	PRI2
YDR121W	DPB4	YDR122W	KIN1	YGR240C	PFK1	YKL051W	SFK1
YDR122W	KIN1	YDR127W	ARO1	YGR254W	ENO1	YKL055C	OAR1
YDR127W	ARO1	YDR129C	SAC6	YGR264C	MES1	YKL057C	NUP120
YDR129C	SAC6	YDR132C		YGR282C	BGL2	YKL058W	TOA2
YDR132C		YDR133C		YGR284C	ERV29	YKL061W	BLI1
YDR133C		YDR135C	YCF1	YGR285C	ZUO1	YKL068W-A
YDR135C	YCF1	YDR141C	DOP1	YHL001W	RPL14B	YKL072W	STB6
YDR141C	DOP1	YDR143C	SAN1	YHL003C	LAG1	YKL077W
YDR143C	SAN1	YDR144C	MKC7	YHL021C	AIM17	YKL096W-A	CWP2
YDR144C	MKC7	YDR148C	KGD2	YHL027W	RIM101	YKL100C
YDR148C	KGD2	YDR150W	NUM1	YHL030W	ECM29	YKL109W	HAP4
YDR150W	NUM1	YDR151C	CTH1	YHL033C	RPL8A	YKL114C	APN1
YDR151C	CTH1	YDR154C		YHL034C	SBP1	YKL126W	YPK1
YDR154C		YDR155C	CPR1	YHL040C	ARN1	YKR007W	MEH1
YDR155C	CPR1	YDR156W	RPA14	YHR001W	OSH7	YKR013W	PRY2
YDR156W	RPA14	YDR157W		YHR005C-A	TIM10	YKR017C	HEL1
YDR157W		YDR158W	HOM2	YHR008C	SOD2	YKR023W
YDR158W	HOM2	YDR159W	SAC3	YHR010W	RPL27A	YKR035W-A	DID2
YDR159W	SAC3	YDR166C	SEC5	YHR012W	VPS29	YKR036C	CAF4
YDR166C	SEC5	YDR170C	SEC7	YHR013C	ARD1	YKR037C	SPC34
YDR170C	SEC7	YDR171W	HSP42	YHR018C	ARG4	YKR039W	GAP1
YDR171W	HSP42	YDR172W	SUP35	YHR019C	DED81	YKR044W	UIP5
YDR172W	SUP35	YDR175C	RSM24	YHR020W		YKR045C
YDR175C	RSM24	YDR176W	NGG1	YHR027C	RPN1	YKR074W	AIM29
YDR176W	NGG1	YDR177W	UBC1	YHR039C	MSC7	YKR083C	DAD2
YDR177W	UBC1	YDR180W	SCC2	YHR042W	NCP1	YKR095W-A	PCC1
YDR180W	SCC2	YDR182W-A		YHR047C	AAP1	YKR096W	ESL2
YDR182W-A		YDR183C-A		YHR049W	FSH1	YKR097W	PCK1
YDR183C-A		YDR184C	ATC1	YHR052W	CIC1	YPL224C	MMT2
YDR184C	ATC1	YDR186C		YHR064C	SSZ1	YDR447C	RPS17B
YDR186C		YDR188W	CCT6	YHR065C	RRP3	YDR492W	IZH1
YDR188W	CCT6	YDR189W	SLY1	YHR068W	DYS1	YDR500C	RPL37B
YDR189W	SLY1	YDR190C	RVB1	YHR069C	RRP4	YDR510W	SMT3
YDR190C	RVB1	YDR202C	RAV2	YHR071W	PCL5	YDR527W	RBA50
YDR202C	RAV2	YDR205W	MSC2	YHR072W-A	NOP10	YDR528W	HLR1
YDR205W	MSC2	YDR208W	MSS4	YHR074W	QNS1	YEL001C	IRC22
YDR208W	MSS4	YDR210W		YHR088W	RPF1	YEL033W	MTC7
YDR210W		YDR211W	GCD6	YHR094C	HXT1	YEL034W	HYP2
YDR211W	GCD6	YDR217C	RAD9	YHR099W	TRA1	YEL045C
YDR217C	RAD9	YDR220C		YHR122W	CIA2	YEL046C	GLY1
YDR220C		YDR224C	HTB1	YHR137W	ARO9	YER019C-A	SBH2
YDR224C	HTB1	YDR225W	HTA1	YHR138C		YER031C	YPT31
YDR225W	HTA1	YDR226W	ADK1	YHR142W	CHS7	YER036C	ARB1
YDR226W	ADK1	YDR227W	SIR4	YHR147C	MRPL6	YER046W-A
YDR227W	SIR4	YDR229W	IVY1	YHR148W	IMP3	YER052C	HOM3
YDR229W	IVY1	YDR232W	HEM1	YHR166C	CDC23	YER056C-A	RPL34A
YDR232W	HEM1	YDR233C	RTN1	YHR167W	THP2	YER063W	THO1
YDR233C	RTN1	YDR234W	LYS4	YHR170W	NMD3	YER064C	VHR2
YDR234W	LYS4	YDR238C	SEC26	YHR179W	OYE2	YER080W	AIM9
YDR238C	SEC26	YDR242W	AMD2	YHR183W	GND1	YER087C-A
YDR242W	AMD2	YDR249C		YHR186C	KOG1	YER088C-A
YDR249C		YDR252W	BTT1	YHR190W	ERG9	YER145C	FTR1
YDR252W	BTT1	YDR256C	CTA1	YHR193C	EGD2	YER148W-A
YDR256C	CTA1	YDR257C	RKM4	YHR197W	RIX1	YER154W	OXA1
YDR257C	RKM4	YDR260C	SWM1	YHR203C	RPS4B	YER155C	BEM2
YDR260C	SWM1	YDR265W	PEX10	YHR208W	BAT1	YER165W	PAB1
YDR265W	PEX10	YDR280W	RRP45	YIL041W	GVP36	YER178W	PDA1
YDR280W	RRP45	YDR287W	INM2	YIL044C	AGE2	YFL001W	DEG1
YDR287W	INM2	YDR289C	RTT103	YIL051C	MMF1	YFL009W	CDC4
YDR289C	RTT103	YDR292C	SRP101	YIL052C	RPL34B	YFL026W	STE2
YDR292C	SRP101	YDR294C	DPL1	YIL053W	GPP1	YFL039C	ACT1
YDR294C	DPL1	YDR299W	BFR2	YIL062C	ARC15	YFL048C	EMP47
YDR299W	BFR2	YDR300C	PRO1	YIL063C	YRB2	YFR040W	SAP155
YDR300C	PRO1	YDR303C	RSC3	YIL070C	MAM33	YFR048W	RMD8
YDR303C	RSC3	YDR304C	CPR5	YIL074C	SER33	YFR052C-A
YDR304C	CPR5	YDR306C		YIL075C	RPN2	YFR052W	RPN12
YDR306C		YDR308C	SRB7	YIL076W	SEC28	YGL023C	PIB2
YDR308C	SRB7	YDR315C	IPK1	YIL078W	THS1	YGL028C	SCW11
YDR315C	IPK1	YDR320C	SWA2	YIL083C	CAB2	YGL030W	RPL30
YDR320C	SWA2	YDR320W-B		YIL104C	SHQ1	YGL040C	HEM2
YDR320W-B		YDR321W	ASP1	YIL109C	SEC24	YGL065C	ALG2
YDR321W	ASP1	YDR329C	PEX3	YIL116W	HIS5	YGL078C	DBP3
YDR329C	PEX3	YDR331W	GPI8	YIL124W	AYR1	YGL132W
YDR331W	GPI8	YDR332W	IRC3	YIL126W	STH1	YGL137W	SEC27
YDR332W	IRC3	YDR333C	RQC1	YIL133C	RPL16A	YGL166W	CUP2
YDR333C	RQC1	YDR334W	SWR1	YIL137C	TMA108	YGL229C	SAP4
YDR334W	SWR1	YDR341C		YIL143C	SSL2	YGL256W	ADH4
YDR341C		YDR342C	HXT7	YIL144W	NDC80	YGR025W
YDR342C	HXT7	YDR343C	HXT6	YIL156W-B		YGR026W
YDR343C	HXT6	YDR345C	HXT3	YIR011C	STS1	YGR060W	ERG25
YDR345C	HXT3	YDR346C	SVF1	YIR018W	YAP5	YGR062C	COX18
YDR346C	SVF1	YDR347W	MRP1	YIR026C	YVH1	YGR090W	UTP22
YDR347W	MRP1	YDR349C	YPS7	YIR034C	LYS1	YGR094W	VAS1
YDR349C	YPS7	YDR350C	ATP22	YIR037W	HYR1	YGR095C	RRP46
YDR350C	ATP22	YDR353W	TRR1	YJL001W	PRE3	YGR097W	ASK10
YDR353W	TRR1	YDR356W	SPC110	YJL008C	CCT8	YGR119C	NUP57
YDR356W	SPC110	YDR361C	BCP1	YJL010C	NOP9	YGR131W	FHN1
YDR361C	BCP1	YDR362C	TFC6	YJL012C	VTC4	YGR159C	NSR1
YDR362C	TFC6	YDR367W	KEI1	YJL026W	RNR2	YGR169C-A	LSO2
YDR367W	KEI1	YDR368W	YPR1	YJL033W	HCA4	YGR182C
YDR368W	YPR1	YDR370C	DXO1	YJL034W	KAR2	YGR184C	UBR1
YDR370C	DXO1	YDR372C	VPS74	YJL050W	MTR4	YGR233C	PHO81
YDR372C	VPS74	YDR380W	ARO10	YJL052W	TDH1	YGR240C-A
YDR380W	ARO10	YDR381W	YRA1	YJL060W	BNA3	YGR241C	YAP1802
YDR381W	YRA1	YDR382W	RPP2B	YJL078C	PRY3	YGR252W	GCN5
YDR382W	RPP2B	YDR385W	EFT2	YJL094C	KHA1	YGR253C	PUP2
YDR385W	EFT2	YDR386W	MUS81	YJL101C	GSH1	YGR255C	COQ6
YDR386W	MUS81	YDR394W	RPT3	YJL109C	UTP10	YHR007C	ERG11
YDR394W	RPT3	YDR395W	SXM1	YJL117W	PHO86	YHR007C-A
YDR395W	SXM1	YDR398W	UTP5	YJL125C	GCD14	YHR021C	RPS27B
YDR398W	UTP5	YDR399W	HPT1	YJL143W	TIM17	YHR025W	THR1
YDR399W	HPT1	YDR400W	URH1	YJL151C	SNA3	YHR034C	PIH1
YDR400W	URH1	YDR401W		YJL156C	SSY5	YHR050W	SMF2
YDR401W		YDR406W-A		YJL159W	HSP150	YHR083W	SAM35
YDR406W-A		YDR407C	TRS120	YJL167W	ERG20	YHR117W	TOM71
YDR407C	TRS120	YDR410C	STE14	YJL172W	CPS1	YHR136C	SPL2
YDR410C	STE14	YDR414C	ERD1	YJL177W	RPL17B	YHR143W	DSE2
YDR414C	ERD1	YDR418W	RPL12B	YJL190C	RPS22A	YHR154W	RTT107
YDR418W	RPL12B	YDR420W	HKR1	YJL198W	PHO90	YHR195W	NVJ1
YDR420W	HKR1	YDR423C	CAD1	YJL200C	ACO2	YHR196W	UTP9
YDR423C	CAD1	YDR427W	RPN9	YJL207C	LAA1	YHR200W	RPN10
YDR427W	RPN9	YDR429C	TIF35	YJL212C	OPT1	YHR215W	PHO12
YDR429C	TIF35	YDR430C	CYM1	YJL217W	REE1	YIL015W	BAR1
YDR430C	CYM1	YDR432W	NPL3	YJR001W	AVT1	YIL025C
YDR432W	NPL3	YDR439W	LRS4	YJR005W	APL1	YIL030W-A
YDR439W	LRS4	YDR440W	DOT1	YJR016C	ILV3	YIL064W	EFM4
YDR440W	DOT1	YDR443C	SSN2	YJR017C	ESS1	YIL069C	RPS24B
YKL007W	CAP1	YDR447C	RPS17B	YJR041C	URB2	YIL105C	SLM1
YKL015W	PUT3	YDR450W	RPS18A	YJR042W	NUP85	YIL119C	RPI1
YKL019W	RAM2	YDR456W	NHX1	YJR045C	SSC1	YIL123W	SIM1
YKL021C	MAK11	YDR457W	TOM1	YJR048W	CYC1	YIL130W	ASG1
YKL023W		YDR463W	STP1	YJR052W	RAD7	YIL142W	CCT2
YKL025C	PAN3	YDR471W	RPL27B	YJR060W	CBF1	YIL153W	RRD1
YKL026C	GPX1	YDR477W	SNF1	YJR064W	CCT5	YIR006C	PAN1
YKL028W	TFA1	YDR479C	PEX29	YJR083C	ACF4	YIR012W	SQT1
YKL039W	PTM1	YDR481C	PHO8	YJR085C		YIR033W	MGA2
YKL045W	PRI2	YDR492W	IZH1	YJR088C	EMC2	YJL041W	NSP1
YKL051W	SFK1	YDR495C	VPS3	YJR093C	FIP1	YJL053W	PEP8
YKL055C	OAR1	YDR496C	PUF6	YJR104C	SOD1	YJL068C
YKL057C	NUP120	YDR497C	ITR1	YJR109C	CPA2	YJL129C	TRK1
YKL058W	TOA2	YDR499W	LCD1	YJR123W	RPS5	YJL136C	RPS21B
YKL061W	BLI1	YDR500C	RPL37B	YJR125C	ENT3	YJL140W	RPB4
YKL063C		YDR502C	SAM2	YJR135W-A	TIM8	YJL149W	DAS1
YKL068W-A		YDR508C	GNP1	YJR141W		YJL154C	VPS35
YKL072W	STB6	YDR510W	SMT3	YJR145C	RPS4A	YJL165C	HAL5
YKL077W		YDR512C	EMI1	YJR148W	BAT2	YJL178C	ATG27
YKL096W-A	CWP2	YDR520C	URC2	YKL003C	MRP17	YJL189W	RPL39
YKL100C		YDR524C	AGE1	YKL008C	LAC1	YJL191W	RPS14B
YKL109W	HAP4	YDR524C-B		YKL010C	UFD4	YJL209W	CBP1
YKL114C	APN1	YDR525W-A	SNA2	YKL013C	ARC19	YJR007W	SUI2
YKL126W	YPK1	YDR527W	RBA50	YKL014C	URB1	YJR012C
YKR007W	MEH1	YDR528W	HLR1	YKL016C	ATP7	YJR023C
YKR013W	PRY2	YDR534C	FIT1	YKL024C	URA6	YJR046W	TAH11
YKR014C	YPT52	YDR539W	FDC1	YKL032C	IXR1	YJR063W	RPA12
YKR017C	HEL1	YEL001C	IRC22	YKL034W	TUL1	YJR068W	RFC2
YKR023W		YEL002C	WBP1	YKL037W	AIM26	YJR086W	STE18
YKR035W-A	DID2	YEL007W	MIT1	YKL054C	DEF1	YJR087W
YKR036C	CAF4	YEL009C	GCN4	YKL056C	TMA19	YJR094W-A	RPL43B
YKR037C	SPC34	YEL013W	VAC8	YKL082C	RRP14	YJR105W	ADO1
YKR039W	GAP1	YEL015W	EDC3	YKL099C	UTP11	YJR113C	RSM7
YKR044W	UIP5	YEL019C	MMS21	YKL103C	APE1	YJR120W
YKR045C		YEL022W	GEA2	YKL122C	SRP21	YJR121W	ATP2
YKR074W	AIM29	YEL026W	SNU13	YKL128C	PMU1	YJR122W	IBA57
YKR083C	DAD2	YEL027W	VMA3	YKL135C	APL2	YJR133W	XPT1
YKR095W-A	PCC1	YEL031W	SPF1	YKL138C	MRPL31	YKL006W	RPL14A
YKR096W	ESL2	YEL033W	MTC7	YKL143W	LTV1	YKL009W	MRT4
YKR097W	PCK1	YEL034W	HYP2	YKL150W	MCR1	YKL017C	HCS1
YPL224C	MMT2	YEL040W	UTR2	YKL152C	GPM1	YKL018W	SWD2
YDR443C	SSN2	YEL043W		YKL164C	PIR1	YKL027W	TCD2
YDR447C	RPS17B	YEL045C		YKL179C	COY1	YKL033W-A
YDR450W	RPS18A	YEL046C	GLY1	YKL180W	RPL17A	YKL035W	UGP1
YDR456W	NHX1	YEL052W	AFG1	YKL182W	FAS1	YKL038W	RGT1
YDR457W	TOM1	YEL054C	RPL12A	YKL185W	ASH1	YKL042W	SPC42
YDR463W	STP1	YEL056W	HAT2	YKL186C	MTR2	YKL043W	PHD1
YDR471W	RPL27B	YEL060C	PRB1	YKL192C	ACP1	YKL053C-A	MDM35
YDR477W	SNF1	YEL065W	SIT1	YKL210W	UBA1	YKL067W	YNK1
YDR479C	PEX29	YEL071W	DLD3	YKL211C	TRP3	YKL068W	NUP100
YDR481C	PHO8	YER003C	PMI40	YKL216W	URA1	YKL069W
YDR492W	IZH1	YER004W	FMP52	YKR011C		YKL073W	LHS1
YDR495C	VPS3	YER006W	NUG1	YKR022C	NTR2	YKL080W	VMA5
YDR496C	PUF6	YER008C	SEC3	YKR031C	SPO14	YKL081W	TEF4
YDR497C	ITR1	YER009W	NTF2	YKR034W	DAL80	YKL084W	HOT13
YDR499W	LCD1	YER011W	TIR1	YKR048C	NAP1	YKL085W	MDH1
YDR500C	RPL37B	YER013W	PRP22	YKR056W	TRM2	YKL089W	MIF2
YDR502C	SAM2	YER017C	AFG3	YKR058W	GLG1	YKL092C	BUD2
YDR508C	GNP1	YER019C-A	SBH2	YKR065C	PAM17	YKL094W	YJU3
YDR510W	SMT3	YER021W	RPN3	YKR066C	CCP1	YKL096W	CWP1
YDR512C	EMI1	YER022W	SRB4	YKR092C	SRP40	YKL106W	AAT1
YDR520C	URC2	YER023W	PRO3	YLL006W	MMM1	YKL111C
YDR524C	AGE1	YER025W	GCD11	YLL009C	COX17	YKL112W	ABF1
YDR524C-B		YER026C	CHO1	YLL018C	DPS1	YKL115C
YDR525W-A	SNA2	YER031C	YPT31	YLL024C	SSA2	YKL117W	SBA1
YDR527W	RBA50	YER032W	FIR1	YLL026W	HSP104	YKL120W	OAC1
YDR528W	HLR1	YER034W		YLL036C	PRP19	YKL123W
YDR534C	FIT1	YER036C	ARB1	YLL039C	UBI4	YKL124W	SSH4
YDR539W	FDC1	YER037W	PHM8	YLR018C	POM34	YKL136W
YEL001C	IRC22	YER042W	MXR1	YLR027C	AAT2	YKL139W	CTK1
YEL002C	WBP1	YER043C	SAH1	YLR029C	RPL15A	YKL156W	RPS27A
YEL007W	MIT1	YER044C	ERG28	YLR043C	TRX1	YKR005C
YEL009C	GCN4	YER046W-A		YLR048W	RPS0B	YKR008W	RSC4
YEL013W	VAC8	YER047C	SAP1	YLR058C	SHM2	YKR010C	TOF2
YEL015W	EDC3	YER049W	TPA1	YLR060W	FRS1	YKR021W	ALY1
YEL019C	MMS21	YER051W	JHD1	YLR064W	PER33	YKR042W	UTH1
YEL022W	GEA2	YER052C	HOM3	YLR075W	RPL10	YKR057W	RPS21A
YEL026W	SNU13	YER055C	HIS1	YLR086W	SMC4	YKR059W	TIF1
YEL027W	VMA3	YER056C	FCY2	YLR094C	GIS3	YKR067W	GPT2
YEL031W	SPF1	YER056C-A	RPL34A	YLR095C	IOC2	YKR077W	MSA2
YEL033W	MTC7	YER057C	HMF1	YLR096W	KIN2	YKR082W	NUP133
YEL034W	HYP2	YER062C	GPP2	YLR106C	MDN1	YKR084C	HBS1
YEL040W	UTR2	YER063W	THO1	YLR108C		YKR093W	PTR2
YEL043W		YER064C	VHR2	YLR109W	AHP1	YLL011W	SOF1
YEL045C		YER067W	RGI1	YLR133W	CKI1	YLL014W	EMC6
YEL046C	GLY1	YER068W	MOT2	YLR136C	TIS11	YLL020C
YEL052W	AFG1	YER069W	ARG5,6	YLR148W	PEP3	YLL031C	GPI13
YEL054C	RPL12A	YER070W	RNR1	YLR175W	CBF5	YLL050C	COF1
YEL056W	HAT2	YER072W	VTC1	YLR180W	SAM1	YLR017W	MEU1
YEL060C	PRB1	YER073W	ALD5	YLR192C	HCR1	YLR054C	OSW2
YEL065W	SIT1	YER080W	AIM9	YLR193C	UPS1	YLR055C	SPT8
YEL071W	DLD3	YER081W	SER3	YLR194C		YLR056W	ERG3
YER003C	PMI40	YER082C	UTP7	YLR197W	NOP56	YLR059C	REX2
YER004W	FMP52	YER083C	GET2	YLR205C	HMX1	YLR061W	RPL22A
YER006W	NUG1	YER086W	ILV1	YLR214W	FRE1	YLR073C	RFU1
YER008C	SEC3	YER087C-A		YLR216C	CPR6	YLR074C	BUD20
YER009W	NTF2	YER087C-B	SBH1	YLR244C	MAP1	YLR084C	RAX2
YER011W	TIR1	YER088C-A		YLR248W	RCK2	YLR092W	SUL2
YER013W	PRP22	YER089C	PTC2	YLR254C	NDL1	YLR101C
YER017C	AFG3	YER090W	TRP2	YLR259C	HSP60	YLR115W	CFT2
YER019C-A	SBH2	YER091C	MET6	YLR266C	PDR8	YLR120C	YPS1
YER021W	RPN3	YER093C	TSC11	YLR293C	GSP1	YLR143W	DPH6
YER022W	SRB4	YER095W	RAD51	YLR300W	EXG1	YLR150W	STM1
YER023W	PRO3	YER102W	RPS8B	YLR304C	ACO1	YLR185W	RPL37A
YER025W	GCD11	YER110C	KAP123	YLR305C	STT4	YLR202C
YER026C	CHO1	YER114C	BOI2	YLR325C	RPL38	YLR203C	MSS51
YER031C	YPT31	YER117W	RPL23B	YLR333C	RPS25B	YLR219W	MSC3
YER032W	FIR1	YER120W	SCS2	YLR336C	SGD1	YLR229C	CDC42
YER034W		YER122C	GLO3	YLR340W	RPP0	YLR231C	BNA5
YER036C	ARB1	YER123W	YCK3	YLR342W	FKS1	YLR285C-A
YER037W	PHM8	YER124C	DSE1	YLR355C	ILV5	YLR291C	GCD7
YER042W	MXR1	YER126C	NSA2	YLR359W	ADE13	YLR294C
YER043C	SAH1	YER127W	LCP5	YLR364W	GRX8	YLR314C	CDC3
YER044C	ERG28	YER133W	GLC7	YLR367W	RPS22B	YLR337C	VRP1
YER046W-A		YER142C	MAG1	YLR388W	RPS29A	YLR342W-A
YER047C	SAP1	YER143W	DDI1	YLR390W-A	CCW14	YLR344W	RPL26A
YER049W	TPA1	YER145C	FTR1	YLR395C	COX8	YLR373C	VID22
YER051W	JHD1	YER148W-A		YLR396C	VPS33	YLR402W
YER052C	HOM3	YER150W	SPI1	YLR398C	SKI2	YLR412W	BER1
YER055C	HIS1	YER151C	UBP3	YLR406C	RPL31B	YLR436C	ECM30
YER056C	FCY2	YER153C	PET122	YLR410W	VIP1	YLR448W	RPL6B
YER056C-A	RPL34A	YER154W	OXA1	YLR413W	INA1	YML013W	UBX2
YER057C	HMF1	YER155C	BEM2	YLR418C	CDC73	YML018C
YER062C	GPP2	YER157W	COG3	YLR432W	IMD3	YML024W	RPS17A
YER063W	THO1	YER161C	SPT2	YLR439W	MRPL4	YML035C	AMD1
YER064C	VHR2	YER165W	PAB1	YLR441C	RPS1A	YML052W	SUR7
YER067W	RGI1	YER168C	CCA1	YLR449W	FPR4	YML072C	TCB3
YER068W	MOT2	YER172C	BRR2	YML004C	GLO1	YML073C	RPL6A
YER069W	ARG5,6	YER177W	BMH1	YML008C	ERG6	YML101C-A
YER070W	RNR1	YER178W	PDA1	YML022W	APT1	YML110C	COQ5
YER072W	VTC1	YFL001W	DEG1	YML026C	RPS18B	YML124C	TUB3
YER073W	ALD5	YFL002C	SPB4	YML028W	TSA1	YMR001C-A
YER080W	AIM9	YFL003C	MSH4	YML048W	GSF2	YMR012W	CLU1
YER081W	SER3	YFL004W	VTC2	YML056C	IMD4	YMR027W
YER082C	UTP7	YFL007W	BLM10	YML058W	SML1	YMR064W	AEP1
YER083C	GET2	YFL009W	CDC4	YML060W	OGG1	YMR131C	RRB1
YER086W	ILV1	YFL012W-A		YML063W	RPS1B	YMR142C	RPL13B
YER087C-A		YFL013C	IES1	YML069W	POB3	YMR143W	RPS16A
YER087C-B	SBH1	YFL014W	HSP12	YML070W	DAK1	YMR173W-A
YER088C-A		YFL016C	MDJ1	YML074C	FPR3	YMR193W	MRPL24
YER089C	PTC2	YFL018C	LPD1	YML092C	PRE8	YMR194W	RPL36A
YER090W	TRP2	YFL024C	EPL1	YML100W	TSL1	YMR199W	CLN1
YER091C	MET6	YFL025C	BST1	YML109W	ZDS2	YMR213W	CEF1
YER093C	TSC11	YFL026W	STE2	YML116W	ATR1	YMR223W	UBP8
YER095W	RAD51	YFL027C	GYP8	YML131W		YMR225C	MRPL44
YER102W	RPS8B	YFL028C	CAF16	YMR009W	ADI1	YMR229C	RRP5
YER110C	KAP123	YFL031W	HAC1	YMR011W	HXT2	YMR242C	RPL20A
YER114C	BOI2	YFL032W		YMR015C	ERG5	YMR276W	DSK2
YER117W	RPL23B	YFL034C-A	RPL22B	YMR044W	IOC4	YMR296C	LCB1
YER120W	SCS2	YFL034C-B	MOB2	YMR049C	ERB1	YMR300C	ADE4
YER122C	GLO3	YFL034W		YMR058W	FET3	YMR304C-A
YER123W	YCK3	YFL037W	TUB2	YMR062C	ARG7	YMR310C
YER124C	DSE1	YFL039C	ACT1	YMR075W	RCO1	YNL007C	SIS1
YER126C	NSA2	YFL045C	SEC53	YMR076C	PDS5	YNL037C	IDH1
YER127W	LCP5	YFL046W	FMP32	YMR080C	NAM7	YNL045W	LAP2
YER133W	GLC7	YFL048C	EMP47	YMR083W	ADH3	YNL091W	NST1
YER142C	MAG1	YFL049W	SWP82	YMR091C	NPL6	YNL098C	RAS2
YER143W	DDI1	YFR004W	RPN11	YMR092C	AIP1	YNL160W	YGP1
YER145C	FTR1	YFR005C	SAD1	YMR093W	UTP15	YNL162W	RPL42A
YER148W-A		YFR008W	FAR7	YMR099C		YNL179C
YER150W	SPI1	YFR009W	GCN20	YMR108W	ILV2	YNL180C	RHO5
YER151C	UBP3	YFR011C	MIC19	YMR120C	ADE17	YNL186W	UBP10
YER153C	PET122	YFR016C		YMR121C	RPL15B	YNL199C	GCR2
YER154W	OXA1	YFR019W	FAB1	YMR122W-A		YNL220W	ADE12
YER155C	BEM2	YFR024C-A	LSB3	YMR128W	ECM16	YNL297C	MON2
YER157W	COG3	YFR028C	CDC14	YMR146C	TIF34	YNL312W	RFA2
YER161C	SPT2	YFR032C-A	RPL29	YMR161W	HLJ1	YNR020C	ATP23
YER165W	PAB1	YFR032C-B		YMR173W	DDR48	YNR025C
YER168C	CCA1	YFR040W	SAP155	YMR183C	SSO2	YNR052C	POP2
YER172C	BRR2	YFR044C	DUG1	YMR186W	HSC82	YNR054C	ESF2
YER177W	BMH1	YFR045W		YMR189W	GCV2	YOL013W-A
YER178W	PDA1	YFR047C	BNA6	YMR197C	VTI1	YOL016C	CMK2
YFL001W	DEG1	YFR048W	RMD8	YMR202W	ERG2	YOL026C	MIM1
YFL002C	SPB4	YFR050C	PRE4	YMR203W	TOM40	YOL064C	MET22
YFL003C	MSH4	YFR051C	RET2	YMR205C	PFK2	YOL068C	HST1
YFL004W	VTC2	YFR052C-A		YMR217W	GUA1	YOL078W	AVO1
YFL007W	BLM10	YFR052W	RPN12	YMR230W	RPS10B	YOL094C	RFC4
YFL009W	CDC4	YFR053C	HXK1	YMR235C	RNA1	YOL099C
YFL012W-A		YFR055W	IRC7	YMR246W	FAA4	YOL105C	WSC3
YFL013C	IES1	YGL003C	CDH1	YMR247C	RKR1	YOL121C	RPS19A
YFL014W	HSP12	YGL005C	COG7	YMR255W	GFD1	YOL129W	VPS68
YFL016C	MDJ1	YGL008C	PMA1	YMR260C	TIF11	YOR047C	STD1
YFL018C	LPD1	YGL009C	LEU1	YMR261C	TPS3	YOR069W	VPS5
YFL024C	EPL1	YGL011C	SCL1	YMR291W	TDA1	YOR099W	KTR1
YFL025C	BST1	YGL012W	ERG4	YMR297W	PRC1	YOR136W	IDH2
YFL026W	STE2	YGL016W	KAP122	YMR298W	LIP1	YOR138C	RUP1
YFL027C	GYP8	YGL023C	PIB2	YMR303C	ADH2	YOR151C	RPB2
YFL028C	CAF16	YGL025C	PGD1	YMR305C	SCW10	YOR182C	RPS30B
YFL031W	HAC1	YGL026C	TRP5	YMR307W	GAS1	YOR184W	SER1
YFL032W		YGL028C	SCW11	YMR309C	NIP1	YOR234C	RPL33B
YFL034C-A	RPL22B	YGL030W	RPL30	YMR312W	ELP6	YOR247W	SRL1
YFL034C-B	MOB2	YGL031C	RPL24A	YMR316W	DIA1	YOR248W
YFL034W		YGL035C	MIG1	YMR318C	ADH6	YOR276W	CAF20
YFL037W	TUB2	YGL037C	PNC1	YMR319C	FET4	YOR306C	MCH5
YFL039C	ACT1	YGL040C	HEM2	YNL002C	RLP7	YOR309C
YFL045C	SEC53	YGL044C	RNA15	YNL004W	HRB1	YOR310C	NOP58
YFL046W	FMP32	YGL045W	RIM8	YNL010W		YOR312C	RPL20B
YFL048C	EMP47	YGL048C	RPT6	YNL015W	PBI2	YOR354C	MSC6
YFL049W	SWP82	YGL049C	TIF4632	YNL016W	PUB1	YOR360C	PDE2
YFR004W	RPN11	YGL054C	ERV14	YNL030W	HHF2	YPL010W	RET3
YFR005C	SAD1	YGL055W	OLE1	YNL031C	HHT2	YPL019C	VTC3
YFR008W	FAR7	YGL056C	SDS23	YNL036W	NCE103	YPL038W-A
YFR009W	GCN20	YGL062W	PYC1	YNL055C	POR1	YPL039W
YFR011C	MIC19	YGL064C	MRH4	YNL066W	SUN4	YPL079W	RPL21B
YFR016C		YGL065C	ALG2	YNL067W	RPL9B	YPL082C	MOT1
YFR019W	FAB1	YGL068W	MNP1	YNL069C	RPL16B	YPL090C	RPS6A
YFR024C-A	LSB3	YGL071W	AFT1	YNL071W	LAT1	YPL125W	KAP120
YFR028C	CDC14	YGL076C	RPL7A	YNL084C	END3	YPL129W	TAF14
YFR032C-A	RPL29	YGL078C	DBP3	YNL096C	RPS7B	YPL158C	AIM44
YFR032C-B		YGL084C	GUP1	YNL103W	MET4	YPL237W	SUI3
YFR040W	SAP155	YGL086W	MAD1	YNL112W	DBP2	YPL249C-A	RPL36B
YFR044C	DUG1	YGL091C	NBP35	YNL121C	TOM70	YPL271W	ATP15
YFR045W		YGL092W	NUP145	YNL123W	NMA111	YPR006C	ICL2
YFR047C	BNA6	YGL099W	LSG1	YNL132W	KRE33	YPR036W	VMA13
YFR048W	RMD8	YGL100W	SEH1	YNL134C		YPR043W	RPL43A
YFR050C	PRE4	YGL103W	RPL28	YNL135C	FPR1	YPR065W	ROX1
YFR051C	RET2	YGL105W	ARC1	YNL141W	AAH1	YPR124W	CTR1
YFR052C-A		YGL106W	MLC1	YNL145W	MFA2	YPR129W	SCD6
YFR052W	RPN12	YGL107C	RMD9	YNL149C	PGA2	YPR135W	CTF4
YFR053C	HXK1	YGL111W	NSA1	YNL159C	ASI2
YFR055W	IRC7	YGL113W	SLD3	YNL168C	FMP41
YGL003C	CDH1	YGL115W	SNF4	YNL178W	RPS3
YGL005C	COG7	YGL117W		YNL182C	IPI3
YGL008C	PMA1	YGL120C	PRP43	YNL189W	SRP1
YGL009C	LEU1	YGL123W	RPS2	YNL208W
YGL011C	SCL1	YGL125W	MET13	YNL223W	ATG4
YGL012W	ERG4	YGL132W		YNL241C	ZWF1
YGL016W	KAP122	YGL135W	RPL1B	YNL244C	SUI1
YGL023C	PIB2	YGL137W	SEC27	YNL245C	CWC25
YGL025C	PGD1	YGL148W	ARO2	YNL251C	NRD1
YGL026C	TRP5	YGL150C	INO80	YNL255C	GIS2
YGL028C	SCW11	YGL151W	NUT1	YNL267W	PIK1
YGL030W	RPL30	YGL157W	ARI1	YNL268W	LYP1
YGL031C	RPL24A	YGL159W		YNL289W	PCL1
YGL035C	MIG1	YGL162W	SUT1	YNL300W	TOS6
YGL037C	PNC1	YGL166W	CUP2	YNL301C	RPL18B
YGL040C	HEM2	YGL167C	PMR1	YNL302C	RPS19B
YGL044C	RNA15	YGL169W	SUA5	YNL322C	KRE1
YGL045W	RIM8	YGL171W	ROK1	YNL327W	EGT2
YGL048C	RPT6	YGL172W	NUP49	YNR001C	CIT1
YGL049C	TIF4632	YGL173C	XRN1	YNR003C	RPC34
YGL054C	ERV14	YGL177W		YNR018W	RCF2
YGL055W	OLE1	YGL178W	MPT5	YNR021W
YGL056C	SDS23	YGL189C	RPS26A	YNR035C	ARC35
YGL062W	PYC1	YGL190C	CDC55	YNR046W	TRM112
YGL064C	MRH4	YGL194C	HOS2	YOL010W	RCL1
YGL065C	ALG2	YGL195W	GCN1	YOL030W	GAS5
YGL068W	MNP1	YGL200C	EMP24	YOL038W	PRE6
YGL071W	AFT1	YGL202W	ARO8	YOL039W	RPP2A
YGL076C	RPL7A	YGL206C	CHC1	YOL041C	NOP12
YGL078C	DBP3	YGL207W	SPT16	YOL049W	GSH2
YGL084C	GUP1	YGL210W	YPT32	YOL054W	PSH1
YGL086W	MAD1	YGL219C	MDM34	YOL077C	BRX1
YGL091C	NBP35	YGL222C	EDC1	YOL081W	IRA2
YGL092W	NUP145	YGL225W	VRG4	YOL097C	WRS1
YGL099W	LSG1	YGL226C-A	OST5	YOL098C
YGL100W	SEH1	YGL227W	VID30	YOL108C	INO4
YGL103W	RPL28	YGL229C	SAP4	YOL109W	ZEO1
YGL105W	ARC1	YGL234W	ADE5,7	YOL120C	RPL18A
YGL106W	MLC1	YGL236C	MTO1	YOL123W	HRP1
YGL107C	RMD9	YGL245W	GUS1	YOL127W	RPL25
YGL111W	NSA1	YGL253W	HXK2	YOL139C	CDC33
YGL113W	SLD3	YGL256W	ADH4	YOL145C	CTR9
YGL115W	SNF4	YGR001C	AML1	YOL151W	GRE2
YGL117W		YGR005C	TFG2	YOL152W	FRE7
YGL120C	PRP43	YGR006W	PRP18	YOR004W	UTP23
YGL123W	RPS2	YGR007W	ECT1	YOR018W	ROD1
YGL125W	MET13	YGR009C	SEC9	YOR020C	HSP10
YGL132W		YGR014W	MSB2	YOR027W	STI1
YGL135W	RPL1B	YGR017W		YOR046C	DBP5
YGL137W	SEC27	YGR020C	VMA7	YOR078W	BUD21
YGL148W	ARO2	YGR025W		YOR087W	YVC1
YGL150C	INO80	YGR026W		YOR096W	RPS7A
YGL151W	NUT1	YGR027C	RPS25A	YOR098C	NUP1
YGL157W	ARI1	YGR032W	GSC2	YOR108W	LEU9
YGL159W		YGR033C	TIM21	YOR119C	RIO1
YGL162W	SUT1	YGR034W	RPL26B	YOR128C	ADE2
YGL166W	CUP2	YGR046W	TAM41	YOR133W	EFT1
YGL167C	PMR1	YGR047C	TFC4	YOR143C	THI80
YGL169W	SUA5	YGR054W		YOR147W	MDM32
YGL171W	ROK1	YGR055W	MUP1	YOR153W	PDR5
YGL172W	NUP49	YGR060W	ERG25	YOR157C	PUP1
YGL173C	XRN1	YGR061C	ADE6	YOR176W	HEM15
YGL177W		YGR062C	COX18	YOR187W	TUF1
YGL178W	MPT5	YGR074W	SMD1	YOR196C	LIP5
YGL189C	RPS26A	YGR078C	PAC10	YOR197W	MCA1
YGL190C	CDC55	YGR082W	TOM20	YOR202W	HIS3
YGL194C	HOS2	YGR083C	GCD2	YOR203W
YGL195W	GCN1	YGR085C	RPL11B	YOR204W	DED1
YGL200C	EMP24	YGR086C	PIL1	YOR206W	NOC2
YGL202W	ARO8	YGR087C	PDC6	YOR207C	RET1
YGL206C	CHC1	YGR089W	NNF2	YOR209C	NPT1
YGL207W	SPT16	YGR090W	UTP22	YOR212W	STE4
YGL210W	YPT32	YGR093W	DRN1	YOR220W	RCN2
YGL219C	MDM34	YGR094W	VAS1	YOR226C	ISU2
YGL222C	EDC1	YGR095C	RRP46	YOR230W	WTM1
YGL225W	VRG4	YGR096W	TPC1	YOR239W	ABP140
YGL226C-A	OST5	YGR097W	ASK10	YOR259C	RPT4
YGL227W	VID30	YGR101W	PCP1	YOR264W	DSE3
YGL229C	SAP4	YGR103W	NOP7	YOR272W	YTM1
YGL234W	ADE5,7	YGR106C	VOA1	YOR273C	TPO4
YGL236C	MTO1	YGR113W	DAM1	YOR291W	YPK9
YGL245W	GUS1	YGR116W	SPT6	YOR293W	RPS10A
YGL253W	HXK2	YGR118W	RPS23A	YOR297C	TIM18
YGL256W	ADH4	YGR119C	NUP57	YOR298C-A	MBF1
YGR001C	AML1	YGR123C	PPT1	YOR304W	ISW2
YGR005C	TFG2	YGR124W	ASN2	YOR311C	DGK1
YGR006W	PRP18	YGR127W		YOR317W	FAA1
YGR007W	ECT1	YGR128C	UTP8	YOR322C	LDB19
YGR009C	SEC9	YGR131W	FHN1	YOR323C	PRO2
YGR014W	MSB2	YGR134W	CAF130	YOR327C	SNC2
YGR017W		YGR145W	ENP2	YOR332W	VMA4
YGR020C	VMA7	YGR147C	NAT2	YOR335C	ALA1
YGR025W		YGR150C	CCM1	YOR369C	RPS12
YGR026W		YGR155W	CYS4	YOR374W	ALD4
YGR027C	RPS25A	YGR157W	CHO2	YOR375C	GDH1
YGR032W	GSC2	YGR159C	NSR1	YOR382W	FIT2
YGR033C	TIM21	YGR161C	RTS3	YOR383C	FIT3
YGR034W	RPL26B	YGR162W	TIF4631	YPL004C	LSP1
YGR046W	TAM41	YGR163W	GTR2	YPL009C	TAE2
YGR047C	TFC4	YGR165W	MRPS35	YPL012W	RRP12
YGR054W		YGR167W	CLC1	YPL029W	SUV3
YGR055W	MUP1	YGR169C-A	LSO2	YPL037C	EGD1
YGR060W	ERG25	YGR170W	PSD2	YPL048W	CAM1
YGR061C	ADE6	YGR173W	RBG2	YPL055C	LGE1
YGR062C	COX18	YGR174C	CBP4	YPL059W	GRX5
YGR074W	SMD1	YGR175C	ERG1	YPL061W	ALD6
YGR078C	PAC10	YGR180C	RNR4	YPL077C
YGR082W	TOM20	YGR182C		YPL086C	ELP3
YGR083C	GCD2	YGR184C	UBR1	YPL093W	NOG1
YGR085C	RPL11B	YGR185C	TYS1	YPL098C	MGR2
YGR086C	PIL1	YGR187C	HGH1	YPL105C	SYH1
YGR087C	PDC6	YGR189C	CRH1	YPL106C	SSE1
YGR089W	NNF2	YGR195W	SKI6	YPL117C	IDI1
YGR090W	UTP22	YGR198W	YPP1	YPL126W	NAN1
YGR093W	DRN1	YGR204W	ADE3	YKL127W	PGM1
YGR094W	VAS1	YGR208W	SER2	YKR055W	RHO4
YGR095C	RRP46	YGR209C	TRX2	YPL127C	HHO1
YGR096W	TPC1	YGR211W	ZPR1	YPL135W	ISU1
YGR097W	ASK10	YGR212W	SLI1	YPL143W	RPL33A
YGR101W	PCP1	YGR214W	RPS0A	YPL146C	NOP53
YGR103W	NOP7	YGR215W	RSM27	YPL154C	PEP4
YGR106C	VOA1	YGR217W	CCH1	YPL160W	CDC60
YGR113W	DAM1	YGR218W	CRM1	YPL163C	SVS1
YGR116W	SPT6	YGR231C	PHB2	YPL179W	PPQ1
YGR118W	RPS23A	YGR232W	NAS6	YPL190C	NAB3
YGR119C	NUP57	YGR233C	PHO81	YPL198W	RPL7B
YGR123C	PPT1	YGR234W	YHB1	YPL212C	PUS1
YGR124W	ASN2	YGR236C	SPG1	YPL215W	CBP3
YGR127W		YGR237C		YPL218W	SAR1
YGR128C	UTP8	YGR239C	PEX21	YPL220W	RPL1A
YGR131W	FHN1	YGR240C	PFK1	YPL225W
YGR134W	CAF130	YGR240C-A		YPL226W	NEW1
YGR145W	ENP2	YGR241C	YAP1802	YPL227C	ALG5
YGR147C	NAT2	YGR245C	SDA1	YPL231W	FAS2
YGR150C	CCM1	YGR251W	NOP19	YPL240C	HSP82
YGR155W	CYS4	YGR252W	GCN5	YPL241C	CIN2
YGR157W	CHO2	YGR253C	PUP2	YPL243W	SRP68
YGR159C	NSR1	YGR254W	ENO1	YPL250C	ICY2
YGR161C	RTS3	YGR255C	COQ6	YPL263C	KEL3
YGR162W	TIF4631	YGR257C	MTM1	YPL265W	DIP5
YGR163W	GTR2	YGR264C	MES1	YPL268W	PLC1
YGR165W	MRPS35	YGR266W		YPL273W	SAM4
YGR167W	CLC1	YGR270W	YTA7	YPL274W	SAM3
YGR169C-A	LSO2	YGR271W	SLH1	YPR010C	RPA135
YGR170W	PSD2	YGR275W	RTT102	YPR011C
YGR173W	RBG2	YGR278W	CWC22	YPR020W	ATP20
YGR174C	CBP4	YGR279C	SCW4	YPR024W	YME1
YGR175C	ERG1	YGR281W	YOR1	YPR028W	YOP1
YGR180C	RNR4	YGR282C	BGL2	YPR035W	GLN1
YGR182C		YGR283C		YPR041W	TIF5
YGR184C	UBR1	YGR284C	ERV29	YPR045C	THP3
YGR185C	TYS1	YGR285C	ZUO1	YPR060C	ARO7
YGR187C	HGH1	YHL001W	RPL14B	YPR062W	FCY1
YGR189C	CRH1	YHL003C	LAG1	YPR063C
YGR195W	SKI6	YHL011C	PRS3	YPR074C	TKL1
YGR198W	YPP1	YHL019C	APM2	YPR102C	RPL11A
YGR204W	ADE3	YHL021C	AIM17	YPR108W	RPN7
YGR208W	SER2	YHL025W	SNF6	YPR112C	MRD1
YGR209C	TRX2	YHL027W	RIM101	YPR125W	YLH47
YGR211W	ZPR1	YHL029C	OCA5	YPR132W	RPS23B
YGR212W	SLI1	YHL030W	ECM29	YPR143W	RRP15
YGR214W	RPS0A	YHL031C	GOS1	YPR145W	ASN1
YGR215W	RSM27	YHL033C	RPL8A	YPR149W	NCE102
YGR217W	CCH1	YHL034C	SBP1	YPR159W	KRE6
YGR218W	CRM1	YHL035C	VMR1	YPR163C	TIF3
YGR231C	PHB2	YHL038C	CBP2	YPR166C	MRP2
YGR232W	NAS6	YHL040C	ARN1	YPR181C	SEC23
YGR233C	PHO81	YHL047C	ARN2	YPR183W	DPM1
YGR234W	YHB1	YHR001W	OSH7
YGR236C	SPG1	YHR003C	TCD1
YGR237C		YHR005C-A	TIM10
YGR239C	PEX21	YHR007C	ERG11
YGR240C	PFK1	YHR007C-A
YGR240C-A		YHR008C	SOD2
YGR241C	YAP1802	YHR009C	TDA3
YGR245C	SDA1	YHR010W	RPL27A
YGR251W	NOP19	YHR012W	VPS29
YGR252W	GCN5	YHR013C	ARD1
YGR253C	PUP2	YHR018C	ARG4
YGR254W	ENO1	YHR019C	DED81
YGR255C	COQ6	YHR020W
YGR257C	MTM1	YHR021C	RPS27B
YGR264C	MES1	YHR023W	MYO1
YGR266W		YHR025W	THR1
YGR270W	YTA7	YHR027C	RPN1
YGR271W	SLH1	YHR034C	PIH1
YGR275W	RTT102	YHR037W	PUT2
YGR278W	CWC22	YHR039C	MSC7
YGR279C	SCW4	YHR039C-A	VMA10
YGR281W	YOR1	YHR042W	NCP1
YGR282C	BGL2	YHR046C	INM1
YGR283C		YHR047C	AAP1
YGR284C	ERV29	YHR049W	FSH1
YGR285C	ZUO1	YHR050W	SMF2
YHL001W	RPL14B	YHR051W	COX6
YHL003C	LAG1	YHR052W	CIC1
YHL011C	PRS3	YHR054C
YHL019C	APM2	YHR056C	RSC30
YHL021C	AIM17	YHR062C	RPP1
YHL025W	SNF6	YHR064C	SSZ1
YHL027W	RIM101	YHR065C	RRP3
YHL029C	OCA5	YHR068W	DYS1
YHL030W	ECM29	YHR069C	RRP4
YHL031C	GOS1	YHR070W	TRM5
YHL033C	RPL8A	YHR071W	PCL5
YHL034C	SBP1	YHR072W	ERG7
YHL035C	VMR1	YHR072W-A	NOP10
YHL038C	CBP2	YHR073W	OSH3
YHL040C	ARN1	YHR074W	QNS1
YHL047C	ARN2	YHR077C	NMD2
YHR001W	OSH7	YHR082C	KSP1
YHR003C	TCD1	YHR083W	SAM35
YHR005C-A	TIM10	YHR088W	RPF1
YHR007C	ERG11	YHR094C	HXT1
YHR007C-A		YHR097C
YHR008C	SOD2	YHR098C	SFB3
YHR009C	TDA3	YHR099W	TRA1
YHR010W	RPL27A	YHR108W	GGA2
YHR012W	VPS29	YHR117W	TOM71
YHR013C	ARD1	YHR120W	MSH1
YHR018C	ARG4	YHR122W	CIA2
YHR019C	DED81	YHR136C	SPL2
YHR020W		YHR137W	ARO9
YHR021C	RPS27B	YHR138C
YHR023W	MYO1	YHR142W	CHS7
YHR025W	THR1	YHR143W	DSE2
YHR027C	RPN1	YHR145C
YHR034C	PIH1	YHR147C	MRPL6
YHR037W	PUT2	YHR148W	IMP3
YHR039C	MSC7	YHR154W	RTT107
YHR039C-A	VMA10	YHR158C	KEL1
YHR042W	NCP1	YHR163W	SOL3
YHR046C	INM1	YHR165C	PRP8
YHR047C	AAP1	YHR166C	CDC23
YHR049W	FSH1	YHR167W	THP2
YHR050W	SMF2	YHR170W	NMD3
YHR051W	COX6	YHR179W	OYE2
YHR052W	CIC1	YHR180W-A
YHR054C		YHR181W	SVP26
YHR056C	RSC30	YHR183W	GND1
YHR062C	RPP1	YHR186C	KOG1
YHR064C	SSZ1	YHR187W	IKI1
YHR065C	RRP3	YHR190W	ERG9
YHR068W	DYS1	YHR192W	LNP1
YHR069C	RRP4	YHR193C	EGD2
YHR070W	TRM5	YHR195W	NVJ1
YHR071W	PCL5	YHR196W	UTP9
YHR072W	ERG7	YHR197W	RIX1
YHR072W-A	NOP10	YHR198C	AIM18
YHR073W	OSH3	YHR199C	AIM46
YHR074W	QNS1	YHR200W	RPN10
YHR077C	NMD2	YHR203C	RPS4B
YHR082C	KSP1	YHR205W	SCH9
YHR083W	SAM35	YHR208W	BAT1
YHR088W	RPF1	YHR215W	PHO12
YHR094C	HXT1	YIL008W	URM1
YHR097C		YIL009C-A	EST3
YHR098C	SFB3	YIL015W	BAR1
YHR099W	TRA1	YIL018W	RPL2B
YHR108W	GGA2	YIL019W	FAF1
YHR117W	TOM71	YIL025C
YHR120W	MSH1	YIL030W-A
YHR122W	CIA2	YIL033C	BCY1
YHR136C	SPL2	YIL034C	CAP2
YHR137W	ARO9	YIL038C	NOT3
YHR138C		YIL041W	GVP36
YHR142W	CHS7	YIL044C	AGE2
YHR143W	DSE2	YIL046W	MET30
YHR145C		YIL048W	NEO1
YHR147C	MRPL6	YIL051C	MMF1
YHR148W	IMP3	YIL052C	RPL34B
YHR154W	RTT107	YIL053W	GPP1
YHR158C	KEL1	YIL061C	SNP1
YHR163W	SOL3	YIL062C	ARC15
YHR165C	PRP8	YIL063C	YRB2
YHR166C	CDC23	YIL064W	EFM4
YHR167W	THP2	YIL067C
YHR170W	NMD3	YIL069C	RPS24B
YHR179W	OYE2	YIL070C	MAM33
YHR180W-A		YIL074C	SER33
YHR181W	SVP26	YIL075C	RPN2
YHR183W	GND1	YIL076W	SEC28
YHR186C	KOG1	YIL078W	THS1
YHR187W	IKI1	YIL079C	AIR1
YHR190W	ERG9	YIL083C	CAB2
YHR192W	LNP1	YIL091C	UTP25
YHR193C	EGD2	YIL095W	PRK1
YHR195W	NVJ1	YIL098C	FMC1
YHR196W	UTP9	YIL104C	SHQ1
YHR197W	RIX1	YIL105C	SLM1
YHR198C	AIM18	YIL106W	MOB1
YHR199C	AIM46	YIL108W
YHR200W	RPN10	YIL109C	SEC24
YHR203C	RPS4B	YIL115C	NUP159
YHR205W	SCH9	YIL116W	HIS5
YHR208W	BAT1	YIL119C	RPI1
YHR215W	PHO12	YIL123W	SIM1
YIL008W	URM1	YIL124W	AYR1
YIL009C-A	EST3	YIL126W	STH1
YIL015W	BAR1	YIL128W	MET18
YIL018W	RPL2B	YIL130W	ASG1
YIL019W	FAF1	YIL133C	RPL16A
YIL025C		YIL137C	TMA108
YIL030W-A		YIL142W	CCT2
YIL033C	BCY1	YIL143C	SSL2
YIL034C	CAP2	YIL144W	NDC80
YIL038C	NOT3	YIL153W	RRD1
YIL041W	GVP36	YIL156W	UBP7
YIL044C	AGE2	YIL156W-B
YIL046W	MET30	YIL159W	BNR1
YIL048W	NEO1	YIL164C	NIT1
YIL051C	MMF1	YIL173W	VTH1
YIL052C	RPL34B	YIR002C	MPH1
YIL053W	GPP1	YIR005W	IST3
YIL061C	SNP1	YIR006C	PAN1
YIL062C	ARC15	YIR011C	STS1
YIL063C	YRB2	YIR012W	SQT1
YIL064W	EFM4	YIR018W	YAP5
YIL067C		YIR023W	DAL81
YIL069C	RPS24B	YIR026C	YVH1
YIL070C	MAM33	YIR033W	MGA2
YIL074C	SER33	YIR034C	LYS1
YIL075C	RPN2	YIR036C	IRC24
YIL076W	SEC28	YIR037W	HYR1
YIL078W	THS1	YJL001W	PRE3
YIL079C	AIR1	YJL004C	SYS1
YIL083C	CAB2	YJL005W	CYR1
YIL091C	UTP25	YJL008C	CCT8
YIL095W	PRK1	YJL010C	NOP9
YIL098C	FMC1	YJL012C	VTC4
YIL104C	SHQ1	YJL014W	CCT3
YIL105C	SLM1	YJL020C	BBC1
YIL106W	MOB1	YJL026W	RNR2
YIL108W		YJL029C	VPS53
YIL109C	SEC24	YJL030W	MAD2
YIL115C	NUP159	YJL033W	HCA4
YIL116W	HIS5	YJL034W	KAR2
YIL119C	RPI1	YJL041W	NSP1
YIL123W	SIM1	YJL042W	MHP1
YIL124W	AYR1	YJL050W	MTR4
YIL126W	STH1	YJL051W	IRC8
YIL128W	MET18	YJL052W	TDH1
YIL130W	ASG1	YJL053W	PEP8
YIL133C	RPL16A	YJL060W	BNA3
YIL137C	TMA108	YJL061W	NUP82
YIL142W	CCT2	YJL062W-A	COA3
YIL143C	SSL2	YJL068C
YIL144W	NDC80	YJL069C	UTP18
YIL153W	RRD1	YJL073W	JEM1
YIL156W	UBP7	YJL076W	NET1
YIL156W-B		YJL078C	PRY3
YIL159W	BNR1	YJL080C	SCP160
YIL164C	NIT1	YJL081C	ARP4
YIL173W	VTH1	YJL085W	EXO70
YIR002C	MPH1	YJL086C
YIR005W	IST3	YJL087C	TRL1
YIR006C	PAN1	YJL090C	DPB11
YIR011C	STS1	YJL091C	GWT1
YIR012W	SQT1	YJL094C	KHA1
YIR018W	YAP5	YJL101C	GSH1
YIR023W	DAL81	YJL109C	UTP10
YIR026C	YVH1	YJL111W	CCT7
YIR033W	MGA2	YJL112W	MDV1
YIR034C	LYS1	YJL117W	PHO86
YIR036C	IRC24	YJL125C	GCD14
YIR037W	HYR1	YJL129C	TRK1
YJL001W	PRE3	YJL130C	URA2
YJL004C	SYS1	YJL133W	MRS3
YJL005W	CYR1	YJL136C	RPS21B
YJL008C	CCT8	YJL140W	RPB4
YJL010C	NOP9	YJL143W	TIM17
YJL012C	VTC4	YJL149W	DAS1
YJL014W	CCT3	YJL151C	SNA3
YJL020C	BBC1	YJL154C	VPS35
YJL026W	RNR2	YJL156C	SSY5
YJL029C	VPS53	YJL159W	HSP150
YJL030W	MAD2	YJL165C	HAL5
YJL033W	HCA4	YJL167W	ERG20
YJL034W	KAR2	YJL172W	CPS1
YJL041W	NSP1	YJL174W	KRE9
YJL042W	MHP1	YJL177W	RPL17B
YJL050W	MTR4	YJL178C	ATG27
YJL051W	IRC8	YJL181W
YJL052W	TDH1	YJL184W	GON7
YJL053W	PEP8	YJL186W	MNN5
YJL060W	BNA3	YJL189W	RPL39
YJL061W	NUP82	YJL190C	RPS22A
YJL062W-A	COA3	YJL191W	RPS14B
YJL068C		YJL198W	PHO90
YJL069C	UTP18	YJL200C	ACO2
YJL073W	JEM1	YJL204C	RCY1
YJL076W	NET1	YJL207C	LAA1
YJL078C	PRY3	YJL209W	CBP1
YJL080C	SCP160	YJL212C	OPT1
YJL081C	ARP4	YJL217W	REE1
YJL085W	EXO70	YJR001W	AVT1
YJL086C		YJR003C
YJL087C	TRL1	YJR005W	APL1
YJL090C	DPB11	YJR007W	SUI2
YJL091C	GWT1	YJR010C-A	SPC1
YJL094C	KHA1	YJR012C
YJL101C	GSH1	YJR016C	ILV3
YJL109C	UTP10	YJR017C	ESS1
YJL111W	CCT7	YJR023C
YJL112W	MDV1	YJR024C	MDE1
YJL117W	PHO86	YJR033C	RAV1
YJL125C	GCD14	YJR041C	URB2
YJL129C	TRK1	YJR042W	NUP85
YJL130C	URA2	YJR043C	POL32
YJL133W	MRS3	YJR045C	SSC1
YJL136C	RPS21B	YJR046W	TAH11
YJL140W	RPB4	YJR048W	CYC1
YJL143W	TIM17	YJR052W	RAD7
YJL149W	DAS1	YJR059W	PTK2
YJL151C	SNA3	YJR060W	CBF1
YJL154C	VPS35	YJR062C	NTA1
YJL156C	SSY5	YJR063W	RPA12
YJL159W	HSP150	YJR064W	CCT5
YJL165C	HAL5	YJR068W	RFC2
YJL167W	ERG20	YJR075W	HOC1
YJL172W	CPS1	YJR083C	ACF4
YJL174W	KRE9	YJR085C
YJL177W	RPL17B	YJR086W	STE18
YJL178C	ATG27	YJR087W
YJL181W		YJR088C	EMC2
YJL184W	GON7	YJR089W	BIR1
YJL186W	MNN5	YJR090C	GRR1
YJL189W	RPL39	YJR091C	JSN1
YJL190C	RPS22A	YJR093C	FIP1
YJL191W	RPS14B	YJR094W-A	RPL43B
YJL198W	PHO90	YJR100C	AIM25
YJL200C	ACO2	YJR104C	SOD1
YJL204C	RCY1	YJR105W	ADO1
YJL207C	LAA1	YJR109C	CPA2
YJL209W	CBP1	YJR110W	YMR1
YJL212C	OPT1	YJR111C
YJL217W	REE1	YJR113C	RSM7
YJR001W	AVT1	YJR117W	STE24
YJR003C		YJR120W
YJR005W	APL1	YJR121W	ATP2
YJR007W	SUI2	YJR122W	IBA57
YJR010C-A	SPC1	YJR123W	RPS5
YJR012C		YJR125C	ENT3
YJR016C	ILV3	YJR126C	VPS70
YJR017C	ESS1	YJR132W	NMD5
YJR023C		YJR133W	XPT1
YJR024C	MDE1	YJR134C	SGM1
YJR033C	RAV1	YJR135W-A	TIM8
YJR041C	URB2	YJR141W
YJR042W	NUP85	YJR143C	PMT4
YJR043C	POL32	YJR145C	RPS4A
YJR045C	SSC1	YJR147W	HMS2
YJR046W	TAH11	YJR148W	BAT2
YJR048W	CYC1	YJR149W
YJR052W	RAD7	YKL003C	MRP17
YJR059W	PTK2	YKL006W	RPL14A
YJR060W	CBF1	YKL008C	LAC1
YJR062C	NTA1	YKL009W	MRT4
YJR063W	RPA12	YKL010C	UFD4
YJR064W	CCT5	YKL013C	ARC19
YJR068W	RFC2	YKL014C	URB1
YJR075W	HOC1	YKL016C	ATP7
YJR083C	ACF4	YKL017C	HCS1
YJR085C		YKL018W	SWD2
YJR086W	STE18	YKL024C	URA6
YJR087W		YKL027W	TCD2
YJR088C	EMC2	YKL029C	MAE1
YJR089W	BIR1	YKL032C	IXR1
YJR090C	GRR1	YKL033W-A
YJR091C	JSN1	YKL034W	TUL1
YJR093C	FIP1	YKL035W	UGP1
YJR094W-A	RPL43B	YKL037W	AIM26
YJR100C	AIM25	YKL038W	RGT1
YJR104C	SOD1	YKL042W	SPC42
YJR105W	ADO1	YKL043W	PHD1
YJR109C	CPA2	YKL052C	ASK1
YJR110W	YMR1	YKL053C-A	MDM35
YJR111C		YKL054C	DEF1
YJR113C	RSM7	YKL056C	TMA19
YJR117W	STE24	YKL067W	YNK1
YJR120W		YKL068W	NUP100
YJR121W	ATP2	YKL069W
YJR122W	IBA57	YKL073W	LHS1
YJR123W	RPS5	YKL080W	VMA5
YJR125C	ENT3	YKL081W	TEF4
YJR126C	VPS70	YKL082C	RRP14
YJR132W	NMD5	YKL084W	HOT13
YJR133W	XPT1	YKL085W	MDH1
YJR134C	SGM1	YKL086W	SRX1
YJR135W-A	TIM8	YKL087C	CYT2
YJR141W		YKL089W	MIF2
YJR143C	PMT4	YKL092C	BUD2
YJR145C	RPS4A	YKL094W	YJU3
YJR147W	HMS2	YKL096W	CWP1
YJR148W	BAT2	YKL099C	UTP11
YJR149W		YKL101W	HSL1
YKL003C	MRP17	YKL103C	APE1
YKL006W	RPL14A	YKL106W	AAT1
YKL008C	LAC1	YKL108W	SLD2
YKL009W	MRT4	YKL111C
YKL010C	UFD4	YKL112W	ABF1
YKL013C	ARC19	YKL115C
YKL014C	URB1	YKL117W	SBA1
YKL016C	ATP7	YKL120W	OAC1
YKL017C	HCS1	YKL122C	SRP21
YKL018W	SWD2	YKL123W
YKL024C	URA6	YKL124W	SSH4
YKL027W	TCD2	YKL125W	RRN3
YKL029C	MAE1	YKL128C	PMU1
YKL032C	IXR1	YKL135C	APL2
YKL033W-A		YKL136W
YKL034W	TUL1	YKL138C	MRPL31
YKL035W	UGP1	YKL139W	CTK1
YKL037W	AIM26	YKL140W	TGL1
YKL038W	RGT1	YKL143W	LTV1
YKL042W	SPC42	YKL149C	DBR1
YKL043W	PHD1	YKL150W	MCR1
YKL052C	ASK1	YKL152C	GPM1
YKL053C-A	MDM35	YKL156W	RPS27A
YKL054C	DEF1	YKL157W	APE2
YKL056C	TMA19	YKL164C	PIR1
YKL067W	YNK1	YKL166C	TPK3
YKL068W	NUP100	YKL172W	EBP2
YKL069W		YKL173W	SNU114
YKL073W	LHS1	YKL179C	COY1
YKL080W	VMA5	YKL180W	RPL17A
YKL081W	TEF4	YKL181W	PRS1
YKL082C	RRP14	YKL182W	FAS1
YKL084W	HOT13	YKL185W	ASH1
YKL085W	MDH1	YKL186C	MTR2
YKL086W	SRX1	YKL191W	DPH2
YKL087C	CYT2	YKL192C	ACP1
YKL089W	MIF2	YKL204W	EAP1
YKL092C	BUD2	YKL205W	LOS1
YKL094W	YJU3	YKL206C	ADD66
YKL096W	CWP1	YKL209C	STE6
YKL099C	UTP11	YKL210W	UBA1
YKL101W	HSL1	YKL211C	TRP3
YKL103C	APE1	YKL216W	URA1
YKL106W	AAT1	YKR002W	PAP1
YKL108W	SLD2	YKR005C
YKL111C		YKR006C	MRPL13
YKL112W	ABF1	YKR008W	RSC4
YKL115C		YKR010C	TOF2
YKL117W	SBA1	YKR011C
YKL120W	OAC1	YKR018C
YKL122C	SRP21	YKR021W	ALY1
YKL123W		YKR022C	NTR2
YKL124W	SSH4	YKR024C	DBP7
YKL125W	RRN3	YKR028W	SAP190
YKL128C	PMU1	YKR031C	SPO14
YKL135C	APL2	YKR034W	DAL80
YKL136W		YKR042W	UTH1
YKL138C	MRPL31	YKR048C	NAP1
YKL139W	CTK1	YKR056W	TRM2
YKL140W	TGL1	YKR057W	RPS21A
YKL143W	LTV1	YKR058W	GLG1
YKL149C	DBR1	YKR059W	TIF1
YKL150W	MCR1	YKR065C	PAM17
YKL152C	GPM1	YKR066C	CCP1
YKL156W	RPS27A	YKR067W	GPT2
YKL157W	APE2	YKR071C	DRE2
YKL164C	PIR1	YKR075C
YKL166C	TPK3	YKR077W	MSA2
YKL172W	EBP2	YKR079C	TRZ1
YKL173W	SNU114	YKR082W	NUP133
YKL179C	COY1	YKR084C	HBS1
YKL180W	RPL17A	YKR085C	MRPL20
YKL181W	PRS1	YKR089C	TGL4
YKL182W	FAS1	YKR092C	SRP40
YKL185W	ASH1	YKR093W	PTR2
YKL186C	MTR2	YKR094C	RPL40B
YKL191W	DPH2	YKR095W	MLP1
YKL192C	ACP1	YLL001W	DNM1
YKL204W	EAP1	YLL006W	MMM1
YKL205W	LOS1	YLL009C	COX17
YKL206C	ADD66	YLL011W	SOF1
YKL209C	STE6	YLL014W	EMC6
YKL210W	UBA1	YLL018C	DPS1
YKL211C	TRP3	YLL019C	KNS1
YKL216W	URA1	YLL020C
YKR002W	PAP1	YLL024C	SSA2
YKR005C		YLL026W	HSP104
YKR006C	MRPL13	YLL028W	TPO1
YKR008W	RSC4	YLL029W	FRA1
YKR010C	TOF2	YLL031C	GPI13
YKR011C		YLL036C	PRP19
YKR018C		YLL038C	ENT4
YKR021W	ALY1	YLL039C	UBI4
YKR022C	NTR2	YLL048C	YBT1
YKR024C	DBP7	YLL050C	COF1
YKR028W	SAP190	YLL051C	FRE6
YKR031C	SPO14	YLL060C	GTT2
YKR034W	DAL80	YLL061W	MMP1
YKR042W	UTH1	YLL063C	AYT1
YKR048C	NAP1	YLR001C
YKR056W	TRM2	YLR009W	RLP24
YKR057W	RPS21A	YLR015W	BRE2
YKR058W	GLG1	YLR017W	MEU1
YKR059W	TIF1	YLR018C	POM34
YKR065C	PAM17	YLR027C	AAT2
YKR066C	CCP1	YLR028C	ADE16
YKR067W	GPT2	YLR029C	RPL15A
YKR071C	DRE2	YLR032W	RAD5
YKR075C		YLR043C	TRX1
YKR077W	MSA2	YLR045C	STU2
YKR079C	TRZ1	YLR048W	RPS0B
YKR082W	NUP133	YLR049C
YKR084C	HBS1	YLR050C
YKR085C	MRPL20	YLR054C	OSW2
YKR089C	TGL4	YLR055C	SPT8
YKR092C	SRP40	YLR056W	ERG3
YKR093W	PTR2	YLR058C	SHM2
YKR094C	RPL40B	YLR059C	REX2
YKR095W	MLP1	YLR060W	FRS1
YLL001W	DNM1	YLR061W	RPL22A
YLL006W	MMM1	YLR064W	PER33
YLL009C	COX17	YLR069C	MEF1
YLL011W	SOF1	YLR072W
YLL014W	EMC6	YLR073C	RFU1
YLL018C	DPS1	YLR074C	BUD20
YLL019C	KNS1	YLR075W	RPL10
YLL020C		YLR083C	EMP70
YLL024C	SSA2	YLR084C	RAX2
YLL026W	HSP104	YLR086W	SMC4
YLL028W	TPO1	YLR092W	SUL2
YLL029W	FRA1	YLR094C	GIS3
YLL031C	GPI13	YLR095C	IOC2
YLL036C	PRP19	YLR096W	KIN2
YLL038C	ENT4	YLR098C	CHA4
YLL039C	UBI4	YLR100W	ERG27
YLL048C	YBT1	YLR101C
YLL050C	COF1	YLR106C	MDN1
YLL051C	FRE6	YLR108C
YLL060C	GTT2	YLR109W	AHP1
YLL061W	MMP1	YLR113W	HOG1
YLL063C	AYT1	YLR114C	AVL9
YLR001C		YLR115W	CFT2
YLR009W	RLP24	YLR119W	SRN2
YLR015W	BRE2	YLR120C	YPS1
YLR017W	MEU1	YLR129W	DIP2
YLR018C	POM34	YLR133W	CKI1
YLR027C	AAT2	YLR134W	PDC5
YLR028C	ADE16	YLR136C	TIS11
YLR029C	RPL15A	YLR143W	DPH6
YLR032W	RAD5	YLR146C	SPE4
YLR043C	TRX1	YLR148W	PEP3
YLR045C	STU2	YLR150W	STM1
YLR048W	RPS0B	YLR153C	ACS2
YLR049C		YLR160C	ASP3-4
YLR050C		YLR164W	SHH4
YLR054C	OSW2	YLR166C	SEC10
YLR055C	SPT8	YLR172C	DPH5
YLR056W	ERG3	YLR173W
YLR058C	SHM2	YLR175W	CBF5
YLR059C	REX2	YLR176C	RFX1
YLR060W	FRS1	YLR180W	SAM1
YLR061W	RPL22A	YLR182W	SWI6
YLR064W	PER33	YLR183C	TOS4
YLR069C	MEF1	YLR185W	RPL37A
YLR072W		YLR186W	EMG1
YLR073C	RFU1	YLR188W	MDL1
YLR074C	BUD20	YLR192C	HCR1
YLR075W	RPL10	YLR193C	UPS1
YLR083C	EMP70	YLR194C
YLR084C	RAX2	YLR197W	NOP56
YLR086W	SMC4	YLR202C
YLR092W	SUL2	YLR203C	MSS51
YLR094C	GIS3	YLR205C	HMX1
YLR095C	IOC2	YLR212C	TUB4
YLR096W	KIN2	YLR214W	FRE1
YLR098C	CHA4	YLR216C	CPR6
YLR100W	ERG27	YLR219W	MSC3
YLR101C		YLR222C	UTP13
YLR106C	MDN1	YLR222C-A
YLR108C		YLR229C	CDC42
YLR109W	AHP1	YLR231C	BNA5
YLR113W	HOG1	YLR244C	MAP1
YLR114C	AVL9	YLR247C	IRC20
YLR115W	CFT2	YLR248W	RCK2
YLR119W	SRN2	YLR254C	NDL1
YLR120C	YPS1	YLR256W	HAP1
YLR129W	DIP2	YLR258W	GSY2
YLR133W	CKI1	YLR259C	HSP60
YLR134W	PDC5	YLR266C	PDR8
YLR136C	TIS11	YLR270W	DCS1
YLR143W	DPH6	YLR274W	MCM5
YLR146C	SPE4	YLR285C-A
YLR148W	PEP3	YLR286C	CTS1
YLR150W	STM1	YLR291C	GCD7
YLR153C	ACS2	YLR293C	GSP1
YLR160C	ASP3-4	YLR294C
YLR164W	SHH4	YLR297W
YLR166C	SEC10	YLR300W	EXG1
YLR172C	DPH5	YLR304C	ACO1
YLR173W		YLR305C	STT4
YLR175W	CBF5	YLR310C	CDC25
YLR176C	RFX1	YLR312W-A	MRPL15
YLR180W	SAM1	YLR314C	CDC3
YLR182W	SWI6	YLR325C	RPL38
YLR183C	TOS4	YLR333C	RPS25B
YLR185W	RPL37A	YLR336C	SGD1
YLR186W	EMG1	YLR337C	VRP1
YLR188W	MDL1	YLR340W	RPP0
YLR192C	HCR1	YLR342W	FKS1
YLR193C	UPS1	YLR342W-A
YLR194C		YLR344W	RPL26A
YLR197W	NOP56	YLR355C	ILV5
YLR202C		YLR357W	RSC2
YLR203C	MSS51	YLR359W	ADE13
YLR205C	HMX1	YLR364W	GRX8
YLR212C	TUB4	YLR367W	RPS22B
YLR214W	FRE1	YLR368W	MDM30
YLR216C	CPR6	YLR370C	ARC18
YLR219W	MSC3	YLR371W	ROM2
YLR222C	UTP13	YLR372W	ELO3
YLR222C-A		YLR373C	VID22
YLR229C	CDC42	YLR378C	SEC61
YLR231C	BNA5	YLR381W	CTF3
YLR244C	MAP1	YLR384C	IKI3
YLR247C	IRC20	YLR387C	REH1
YLR248W	RCK2	YLR388W	RPS29A
YLR254C	NDL1	YLR389C	STE23
YLR256W	HAP1	YLR390W-A	CCW14
YLR258W	GSY2	YLR395C	COX8
YLR259C	HSP60	YLR396C	VPS33
YLR266C	PDR8	YLR397C	AFG2
YLR270W	DCS1	YLR398C	SKI2
YLR274W	MCM5	YLR401C	DUS3
YLR285C-A		YLR402W
YLR286C	CTS1	YLR403W	SFP1
YLR291C	GCD7	YLR406C	RPL31B
YLR293C	GSP1	YLR409C	UTP21
YLR294C		YLR410W	VIP1
YLR297W		YLR412W	BER1
YLR300W	EXG1	YLR413W	INA1
YLR304C	ACO1	YLR418C	CDC73
YLR305C	STT4	YLR419W
YLR310C	CDC25	YLR426W	TDA5
YLR312W-A	MRPL15	YLR429W	CRN1
YLR314C	CDC3	YLR430W	SEN1
YLR325C	RPL38	YLR432W	IMD3
YLR333C	RPS25B	YLR436C	ECM30
YLR336C	SGD1	YLR439W	MRPL4
YLR337C	VRP1	YLR441C	RPS1A
YLR340W	RPP0	YLR448W	RPL6B
YLR342W	FKS1	YLR449W	FPR4
YLR342W-A		YLR452C	SST2
YLR344W	RPL26A	YLR457C	NBP1
YLR355C	ILV5	YLR459W	GAB1
YLR357W	RSC2	YML004C	GLO1
YLR359W	ADE13	YML006C	GIS4
YLR364W	GRX8	YML008C	ERG6
YLR367W	RPS22B	YML010W	SPT5
YLR368W	MDM30	YML013W	UBX2
YLR370C	ARC18	YML018C
YLR371W	ROM2	YML022W	APT1
YLR372W	ELO3	YML024W	RPS17A
YLR373C	VID22	YML025C	YML6
YLR378C	SEC61	YML026C	RPS18B
YLR381W	CTF3	YML027W	YOX1
YLR384C	IKI3	YML028W	TSA1
YLR387C	REH1	YML031W	NDC1
YLR388W	RPS29A	YML035C	AMD1
YLR389C	STE23	YML043C	RRN11
YLR390W-A	CCW14	YML047W-A
YLR395C	COX8	YML048W	GSF2
YLR396C	VPS33	YML051W	GAL80
YLR397C	AFG2	YML052W	SUR7
YLR398C	SKI2	YML056C	IMD4
YLR401C	DUS3	YML058W	SML1
YLR402W		YML060W	OGG1
YLR403W	SFP1	YML062C	MFT1
YLR406C	RPL31B	YML063W	RPS1B
YLR409C	UTP21	YML067C	ERV41
YLR410W	VIP1	YML069W	POB3
YLR412W	BER1	YML070W	DAK1
YLR413W	INA1	YML072C	TCB3
YLR418C	CDC73	YML073C	RPL6A
YLR419W		YML074C	FPR3
YLR426W	TDA5	YML078W	CPR3
YLR429W	CRN1	YML080W	DUS1
YLR430W	SEN1	YML082W
YLR432W	IMD3	YML085C	TUB1
YLR436C	ECM30	YML091C	RPM2
YLR439W	MRPL4	YML092C	PRE8
YLR441C	RPS1A	YML099C	ARG81
YLR448W	RPL6B	YML100W	TSL1
YLR449W	FPR4	YML101C-A
YLR452C	SST2	YML103C	NUP188
YLR457C	NBP1	YML106W	URA5
YLR459W	GAB1	YML107C	PML39
YML004C	GLO1	YML109W	ZDS2
YML006C	GIS4	YML110C	COQ5
YML008C	ERG6	YML111W	BUL2
YML010W	SPT5	YML116W	ATR1
YML013W	UBX2	YML117W	NAB6
YML018C		YML124C	TUB3
YML022W	APT1	YML126C	ERG13
YML024W	RPS17A	YML131W
YML025C	YML6	YMR001C-A
YML026C	RPS18B	YMR006C	PLB2
YML027W	YOX1	YMR008C	PLB1
YML028W	TSA1	YMR009W	ADI1
YML031W	NDC1	YMR011W	HXT2
YML035C	AMD1	YMR012W	CLU1
YML043C	RRN11	YMR014W	BUD22
YML047W-A		YMR015C	ERG5
YML048W	GSF2	YMR016C	SOK2
YML051W	GAL80	YMR019W	STB4
YML052W	SUR7	YMR024W	MRPL3
YML056C	IMD4	YMR026C	PEX12
YML058W	SML1	YMR027W
YML060W	OGG1	YMR028W	TAP42
YML062C	MFT1	YMR030W-A
YML063W	RPS1B	YMR044W	IOC4
YML067C	ERV41	YMR049C	ERB1
YML069W	POB3	YMR053C	STB2
YML070W	DAK1	YMR056C	AAC1
YML072C	TCB3	YMR058W	FET3
YML073C	RPL6A	YMR062C	ARG7
YML074C	FPR3	YMR064W	AEP1
YML078W	CPR3	YMR067C	UBX4
YML080W	DUS1	YMR070W	MOT3
YML082W		YMR075W	RCO1
YML085C	TUB1	YMR076C	PDS5
YML091C	RPM2	YMR078C	CTF18
YML092C	PRE8	YMR080C	NAM7
YML099C	ARG81	YMR083W	ADH3
YML100W	TSL1	YMR091C	NPL6
YML101C-A		YMR092C	AIP1
YML103C	NUP188	YMR093W	UTP15
YML106W	URA5	YMR099C
YML107C	PML39	YMR107W	SPG4
YML109W	ZDS2	YMR108W	ILV2
YML110C	COQ5	YMR110C	HFD1
YML111W	BUL2	YMR112C	MED11
YML116W	ATR1	YMR115W	MGR3
YML117W	NAB6	YMR120C	ADE17
YML124C	TUB3	YMR121C	RPL15B
YML126C	ERG13	YMR122W-A
YML131W		YMR125W	STO1
YMR001C-A		YMR128W	ECM16
YMR006C	PLB2	YMR129W	POM152
YMR008C	PLB1	YMR131C	RRB1
YMR009W	ADI1	YMR139W	RIM11
YMR011W	HXT2	YMR142C	RPL13B
YMR012W	CLU1	YMR143W	RPS16A
YMR014W	BUD22	YMR146C	TIF34
YMR015C	ERG5	YMR150C	IMP1
YMR016C	SOK2	YMR161W	HLJ1
YMR019W	STB4	YMR173W	DDR48
YMR024W	MRPL3	YMR173W-A
YMR026C	PEX12	YMR177W	MMT1
YMR027W		YMR178W
YMR028W	TAP42	YMR183C	SSO2
YMR030W-A		YMR186W	HSC82
YMR044W	IOC4	YMR189W	GCV2
YMR049C	ERB1	YMR193W	MRPL24
YMR053C	STB2	YMR194W	RPL36A
YMR056C	AAC1	YMR197C	VTI1
YMR058W	FET3	YMR199W	CLN1
YMR062C	ARG7	YMR200W	ROT1
YMR064W	AEP1	YMR202W	ERG2
YMR067C	UBX4	YMR203W	TOM40
YMR070W	MOT3	YMR205C	PFK2
YMR075W	RCO1	YMR208W	ERG12
YMR076C	PDS5	YMR210W
YMR078C	CTF18	YMR211W	DML1
YMR080C	NAM7	YMR213W	CEF1
YMR083W	ADH3	YMR214W	SCJ1
YMR091C	NPL6	YMR215W	GAS3
YMR092C	AIP1	YMR216C	SKY1
YMR093W	UTP15	YMR217W	GUA1
YMR099C		YMR218C	TRS130
YMR107W	SPG4	YMR219W	ESC1
YMR108W	ILV2	YMR223W	UBP8
YMR110C	HFD1	YMR225C	MRPL44
YMR112C	MED11	YMR226C
YMR115W	MGR3	YMR229C	RRP5
YMR120C	ADE17	YMR230W	RPS10B
YMR121C	RPL15B	YMR235C	RNA1
YMR122W-A		YMR237W	BCH1
YMR125W	STO1	YMR239C	RNT1
YMR128W	ECM16	YMR240C	CUS1
YMR129W	POM152	YMR242C	RPL20A
YMR131C	RRB1	YMR246W	FAA4
YMR139W	RIM11	YMR247C	RKR1
YMR142C	RPL13B	YMR255W	GFD1
YMR143W	RPS16A	YMR260C	TIF11
YMR146C	TIF34	YMR261C	TPS3
YMR150C	IMP1	YMR263W	SAP30
YMR161W	HLJ1	YMR266W	RSN1
YMR173W	DDR48	YMR276W	DSK2
YMR173W-A		YMR277W	FCP1
YMR177W	MMT1	YMR281W	GPI12
YMR178W		YMR290C	HAS1
YMR183C	SSO2	YMR290W-A
YMR186W	HSC82	YMR291W	TDA1
YMR189W	GCV2	YMR296C	LCB1
YMR193W	MRPL24	YMR297W	PRC1
YMR194W	RPL36A	YMR298W	LIP1
YMR197C	VTI1	YMR300C	ADE4
YMR199W	CLN1	YMR301C	ATM1
YMR200W	ROT1	YMR303C	ADH2
YMR202W	ERG2	YMR304C-A
YMR203W	TOM40	YMR304W	UBP15
YMR205C	PFK2	YMR305C	SCW10
YMR208W	ERG12	YMR307W	GAS1
YMR210W		YMR308C	PSE1
YMR211W	DML1	YMR309C	NIP1
YMR213W	CEF1	YMR310C
YMR214W	SCJ1	YMR312W	ELP6
YMR215W	GAS3	YMR316W	DIA1
YMR216C	SKY1	YMR318C	ADH6
YMR217W	GUA1	YMR319C	FET4
YMR218C	TRS130	YMR321C
YMR219W	ESC1	YNL002C	RLP7
YMR223W	UBP8	YNL004W	HRB1
YMR225C	MRPL44	YNL007C	SIS1
YMR226C		YNL008C	ASI3
YMR229C	RRP5	YNL010W
YMR230W	RPS10B	YNL015W	PBI2
YMR235C	RNA1	YNL016W	PUB1
YMR237W	BCH1	YNL020C	ARK1
YMR239C	RNT1	YNL030W	HHF2
YMR240C	CUS1	YNL031C	HHT2
YMR242C	RPL20A	YNL036W	NCE103
YMR246W	FAA4	YNL037C	IDH1
YMR247C	RKR1	YNL041C	COG6
YMR255W	GFD1	YNL042W-B
YMR260C	TIF11	YNL045W	LAP2
YMR261C	TPS3	YNL049C	SFB2
YMR263W	SAP30	YNL053W	MSG5
YMR266W	RSN1	YNL054W	VAC7
YMR276W	DSK2	YNL055C	POR1
YMR277W	FCP1	YNL062C	GCD10
YMR281W	GPI12	YNL066W	SUN4
YMR290C	HAS1	YNL067W	RPL9B
YMR290W-A		YNL069C	RPL16B
YMR291W	TDA1	YNL071W	LAT1
YMR296C	LCB1	YNL081C	SWS2
YMR297W	PRC1	YNL084C	END3
YMR298W	LIP1	YNL085W	MKT1
YMR300C	ADE4	YNL091W	NST1
YMR301C	ATM1	YNL095C
YMR303C	ADH2	YNL096C	RPS7B
YMR304C-A		YNL098C	RAS2
YMR304W	UBP15	YNL100W	MIC27
YMR305C	SCW10	YNL103W	MET4
YMR307W	GAS1	YNL106C	INP52
YMR308C	PSE1	YNL112W	DBP2
YMR309C	NIP1	YNL115C
YMR310C		YNL121C	TOM70
YMR312W	ELP6	YNL123W	NMA111
YMR316W	DIA1	YNL127W	FAR11
YMR318C	ADH6	YNL132W	KRE33
YMR319C	FET4	YNL134C
YMR321C		YNL135C	FPR1
YNL002C	RLP7	YNL139C	THO2
YNL004W	HRB1	YNL140C
YNL007C	SIS1	YNL141W	AAH1
YNL008C	ASI3	YNL143C
YNL010W		YNL145W	MFA2
YNL015W	PBI2	YNL146W
YNL016W	PUB1	YNL149C	PGA2
YNL020C	ARK1	YNL154C	YCK2
YNL030W	HHF2	YNL159C	ASI2
YNL031C	HHT2	YNL160W	YGP1
YNL036W	NCE103	YNL162W	RPL42A
YNL037C	IDH1	YNL163C	RIA1
YNL041C	COG6	YNL168C	FMP41
YNL042W-B		YNL172W	APC1
YNL045W	LAP2	YNL175C	NOP13
YNL049C	SFB2	YNL178W	RPS3
YNL053W	MSG5	YNL179C
YNL054W	VAC7	YNL180C	RHO5
YNL055C	POR1	YNL182C	IPI3
YNL062C	GCD10	YNL186W	UBP10
YNL066W	SUN4	YNL189W	SRP1
YNL067W	RPL9B	YNL192W	CHS1
YNL069C	RPL16B	YNL197C	WHI3
YNL071W	LAT1	YNL199C	GCR2
YNL081C	SWS2	YNL201C	PSY2
YNL084C	END3	YNL206C	RTT106
YNL085W	MKT1	YNL208W
YNL091W	NST1	YNL213C	RRG9
YNL095C		YNL217W
YNL096C	RPS7B	YNL220W	ADE12
YNL098C	RAS2	YNL221C	POP1
YNL100W	MIC27	YNL223W	ATG4
YNL103W	MET4	YNL232W	CSL4
YNL106C	INP52	YNL236W	SIN4
YNL112W	DBP2	YNL237W	YTP1
YNL115C		YNL241C	ZWF1
YNL121C	TOM70	YNL243W	SLA2
YNL123W	NMA111	YNL244C	SUI1
YNL127W	FAR11	YNL245C	CWC25
YNL132W	KRE33	YNL247W
YNL134C		YNL251C	NRD1
YNL135C	FPR1	YNL255C	GIS2
YNL139C	THO2	YNL258C	DSL1
YNL140C		YNL260C	LTO1
YNL141W	AAH1	YNL262W	POL2
YNL143C		YNL263C	YIF1
YNL145W	MFA2	YNL267W	PIK1
YNL146W		YNL268W	LYP1
YNL149C	PGA2	YNL274C	GOR1
YNL154C	YCK2	YNL278W	CAF120
YNL159C	ASI2	YNL284C	MRPL10
YNL160W	YGP1	YNL287W	SEC21
YNL162W	RPL42A	YNL289W	PCL1
YNL163C	RIA1	YNL292W	PUS4
YNL168C	FMP41	YNL297C	MON2
YNL172W	APC1	YNL298W	CLA4
YNL175C	NOP13	YNL299W	TRF5
YNL178W	RPS3	YNL300W	TOS6
YNL179C		YNL301C	RPL18B
YNL180C	RHO5	YNL302C	RPS19B
YNL182C	IPI3	YNL306W	MRPS18
YNL186W	UBP10	YNL312W	RFA2
YNL189W	SRP1	YNL317W	PFS2
YNL192W	CHS1	YNL321W	VNX1
YNL197C	WHI3	YNL322C	KRE1
YNL199C	GCR2	YNL327W	EGT2
YNL201C	PSY2	YNR001C	CIT1
YNL206C	RTT106	YNR003C	RPC34
YNL208W		YNR011C	PRP2
YNL213C	RRG9	YNR016C	ACC1
YNL217W		YNR017W	TIM23
YNL220W	ADE12	YNR018W	RCF2
YNL221C	POP1	YNR019W	ARE2
YNL223W	ATG4	YNR020C	ATP23
YNL232W	CSL4	YNR021W
YNL236W	SIN4	YNR022C	MRPL50
YNL237W	YTP1	YNR025C
YNL241C	ZWF1	YNR033W	ABZ1
YNL243W	SLA2	YNR035C	ARC35
YNL244C	SUI1	YNR038W	DBP6
YNL245C	CWC25	YNR046W	TRM112
YNL247W		YNR051C	BRE5
YNL251C	NRD1	YNR052C	POP2
YNL255C	GIS2	YNR053C	NOG2
YNL258C	DSL1	YNR054C	ESF2
YNL260C	LTO1	YNR058W	BIO3
YNL262W	POL2	YNR066C
YNL263C	YIF1	YNR067C	DSE4
YNL267W	PIK1	YOL004W	SIN3
YNL268W	LYP1	YOL007C	CSI2
YNL274C	GOR1	YOL010W	RCL1
YNL278W	CAF120	YOL011W	PLB3
YNL284C	MRPL10	YOL013W-A
YNL287W	SEC21	YOL016C	CMK2
YNL289W	PCL1	YOL017W	ESC8
YNL292W	PUS4	YOL019W
YNL297C	MON2	YOL020W	TAT2
YNL298W	CLA4	YOL021C	DIS3
YNL299W	TRF5	YOL026C	MIM1
YNL300W	TOS6	YOL027C	MDM38
YNL301C	RPL18B	YOL030W	GAS5
YNL302C	RPS19B	YOL036W
YNL306W	MRPS18	YOL038W	PRE6
YNL312W	RFA2	YOL039W	RPP2A
YNL317W	PFS2	YOL041C	NOP12
YNL321W	VNX1	YOL044W	PEX15
YNL322C	KRE1	YOL049W	GSH2
YNL327W	EGT2	YOL054W	PSH1
YNR001C	CIT1	YOL057W
YNR003C	RPC34	YOL059W	GPD2
YNR011C	PRP2	YOL064C	MET22
YNR016C	ACC1	YOL068C	HST1
YNR017W	TIM23	YOL069W	NUF2
YNR018W	RCF2	YOL073C	DSC2
YNR019W	ARE2	YOL077C	BRX1
YNR020C	ATP23	YOL078W	AVO1
YNR021W		YOL080C	REX4
YNR022C	MRPL50	YOL081W	IRA2
YNR025C		YOL089C	HAL9
YNR033W	ABZ1	YOL094C	RFC4
YNR035C	ARC35	YOL097C	WRS1
YNR038W	DBP6	YOL098C
YNR046W	TRM112	YOL099C
YNR051C	BRE5	YOL105C	WSC3
YNR052C	POP2	YOL108C	INO4
YNR053C	NOG2	YOL109W	ZEO1
YNR054C	ESF2	YOL115W	PAP2
YNR058W	BIO3	YOL120C	RPL18A
YNR066C		YOL121C	RPS19A
YNR067C	DSE4	YOL123W	HRP1
YOL004W	SIN3	YOL126C	MDH2
YOL007C	CSI2	YOL127W	RPL25
YOL010W	RCL1	YOL129W	VPS68
YOL011W	PLB3	YOL133W	HRT1
YOL013W-A		YOL139C	CDC33
YOL016C	CMK2	YOL145C	CTR9
YOL017W	ESC8	YOL151W	GRE2
YOL019W		YOL152W	FRE7
YOL020W	TAT2	YOL155C	HPF1
YOL021C	DIS3	YOL158C	ENB1
YOL026C	MIM1	YOL164W	BDS1
YOL027C	MDM38	YOR002W	ALG6
YOL030W	GAS5	YOR004W	UTP23
YOL036W		YOR006C	TSR3
YOL038W	PRE6	YOR017W	PET127
YOL039W	RPP2A	YOR018W	ROD1
YOL041C	NOP12	YOR020C	HSP10
YOL044W	PEX15	YOR027W	STI1
YOL049W	GSH2	YOR028C	CIN5
YOL054W	PSH1	YOR035C	SHE4
YOL057W		YOR037W	CYC2
YOL059W	GPD2	YOR043W	WHI2
YOL064C	MET22	YOR046C	DBP5
YOL068C	HST1	YOR047C	STD1
YOL069W	NUF2	YOR048C	RAT1
YOL073C	DSC2	YOR051C	ETT1
YOL077C	BRX1	YOR056C	NOB1
YOL078W	AVO1	YOR058C	ASE1
YOL080C	REX4	YOR069W	VPS5
YOL081W	IRA2	YOR072W-B
YOL089C	HAL9	YOR073W	SGO1
YOL094C	RFC4	YOR076C	SKI7
YOL097C	WRS1	YOR078W	BUD21
YOL098C		YOR081C	TGL5
YOL099C		YOR085W	OST3
YOL105C	WSC3	YOR086C	TCB1
YOL108C	INO4	YOR087W	YVC1
YOL109W	ZEO1	YOR090C	PTC5
YOL115W	PAP2	YOR093C
YOL120C	RPL18A	YOR096W	RPS7A
YOL121C	RPS19A	YOR098C	NUP1
YOL123W	HRP1	YOR099W	KTR1
YOL126C	MDH2	YOR108W	LEU9
YOL127W	RPL25	YOR109W	INP53
YOL129W	VPS68	YOR119C	RIO1
YOL133W	HRT1	YOR121C
YOL139C	CDC33	YOR123C	LEO1
YOL145C	CTR9	YOR128C	ADE2
YOL151W	GRE2	YOR132W	VPS17
YOL152W	FRE7	YOR133W	EFT1
YOL155C	HPF1	YOR136W	IDH2
YOL158C	ENB1	YOR137C	SIA1
YOL164W	BDS1	YOR138C	RUP1
YOR002W	ALG6	YOR143C	THI80
YOR004W	UTP23	YOR147W	MDM32
YOR006C	TSR3	YOR149C	SMP3
YOR017W	PET127	YOR151C	RPB2
YOR018W	ROD1	YOR152C
YOR020C	HSP10	YOR153W	PDR5
YOR027W	STI1	YOR156C	NFI1
YOR028C	CIN5	YOR157C	PUP1
YOR035C	SHE4	YOR164C	GET4
YOR037W	CYC2	YOR165W	SEY1
YOR043W	WHI2	YOR169C
YOR046C	DBP5	YOR170W
YOR047C	STD1	YOR176W	HEM15
YOR048C	RAT1	YOR182C	RPS30B
YOR051C	ETT1	YOR184W	SER1
YOR056C	NOB1	YOR187W	TUF1
YOR058C	ASE1	YOR191W	ULS1
YOR069W	VPS5	YOR196C	LIP5
YOR072W-B		YOR197W	MCA1
YOR073W	SGO1	YOR198C	BFR1
YOR076C	SKI7	YOR202W	HIS3
YOR078W	BUD21	YOR203W
YOR081C	TGL5	YOR204W	DED1
YOR085W	OST3	YOR205C	GEP3
YOR086C	TCB1	YOR206W	NOC2
YOR087W	YVC1	YOR207C	RET1
YOR090C	PTC5	YOR209C	NPT1
YOR093C		YOR211C	MGM1
YOR096W	RPS7A	YOR212W	STE4
YOR098C	NUP1	YOR220W	RCN2
YOR099W	KTR1	YOR221C	MCT1
YOR108W	LEU9	YOR223W	DSC3
YOR109W	INP53	YOR226C	ISU2
YOR119C	RIO1	YOR227W	HER1
YOR121C		YOR230W	WTM1
YOR123C	LEO1	YOR233W	KIN4
YOR128C	ADE2	YOR234C	RPL33B
YOR132W	VPS17	YOR235W	IRC13
YOR133W	EFT1	YOR239W	ABP140
YOR136W	IDH2	YOR244W	ESA1
YOR137C	SIA1	YOR245C	DGA1
YOR138C	RUP1	YOR247W	SRL1
YOR143C	THI80	YOR248W
YOR147W	MDM32	YOR259C	RPT4
YOR149C	SMP3	YOR264W	DSE3
YOR151C	RPB2	YOR270C	VPH1
YOR152C		YOR272W	YTM1
YOR153W	PDR5	YOR273C	TPO4
YOR156C	NFI1	YOR276W	CAF20
YOR157C	PUP1	YOR286W	RDL2
YOR164C	GET4	YOR287C	RRP36
YOR165W	SEY1	YOR291W	YPK9
YOR169C		YOR293W	RPS10A
YOR170W		YOR297C	TIM18
YOR176W	HEM15	YOR298C-A	MBF1
YOR182C	RPS30B	YOR299W	BUD7
YOR184W	SER1	YOR303W	CPA1
YOR187W	TUF1	YOR304W	ISW2
YOR191W	ULS1	YOR306C	MCH5
YOR196C	LIP5	YOR309C
YOR197W	MCA1	YOR310C	NOP58
YOR198C	BFR1	YOR311C	DGK1
YOR202W	HIS3	YOR312C	RPL20B
YOR203W		YOR317W	FAA1
YOR204W	DED1	YOR321W	PMT3
YOR205C	GEP3	YOR322C	LDB19
YOR206W	NOC2	YOR323C	PRO2
YOR207C	RET1	YOR324C	FRT1
YOR209C	NPT1	YOR326W	MYO2
YOR211C	MGM1	YOR327C	SNC2
YOR212W	STE4	YOR332W	VMA4
YOR220W	RCN2	YOR334W	MRS2
YOR221C	MCT1	YOR335C	ALA1
YOR223W	DSC3	YOR337W	TEA1
YOR226C	ISU2	YOR338W
YOR227W	HER1	YOR341W	RPA190
YOR230W	WTM1	YOR344C	TYE7
YOR233W	KIN4	YOR346W	REV1
YOR234C	RPL33B	YOR354C	MSC6
YOR235W	IRC13	YOR359W	VTS1
YOR239W	ABP140	YOR360C	PDE2
YOR244W	ESA1	YOR364W
YOR245C	DGA1	YOR367W	SCP1
YOR247W	SRL1	YOR369C	RPS12
YOR248W		YOR372C	NDD1
YOR259C	RPT4	YOR373W	NUD1
YOR264W	DSE3	YOR374W	ALD4
YOR270C	VPH1	YOR375C	GDH1
YOR272W	YTM1	YOR382W	FIT2
YOR273C	TPO4	YOR383C	FIT3
YOR276W	CAF20	YOR386W	PHR1
YOR286W	RDL2	YOR390W	FEX1
YOR287C	RRP36	YPL004C	LSP1
YOR291W	YPK9	YPL006W	NCR1
YOR293W	RPS10A	YPL009C	TAE2
YOR297C	TIM18	YPL010W	RET3
YOR298C-A	MBF1	YPL012W	RRP12
YOR299W	BUD7	YPL016W	SWI1
YOR303W	CPA1	YPL019C	VTC3
YOR304W	ISW2	YPL023C	MET12
YOR306C	MCH5	YPL026C	SKS1
YOR309C		YPL029W	SUV3
YOR310C	NOP58	YPL032C	SVL3
YOR311C	DGK1	YPL037C	EGD1
YOR312C	RPL20B	YPL038W-A
YOR317W	FAA1	YPL039W
YOR321W	PMT3	YPL040C	ISM1
YOR322C	LDB19	YPL048W	CAM1
YOR323C	PRO2	YPL055C	LGE1
YOR324C	FRT1	YPL059W	GRX5
YOR326W	MYO2	YPL061W	ALD6
YOR327C	SNC2	YPL063W	TIM50
YOR332W	VMA4	YPL066W	RGL1
YOR334W	MRS2	YPL069C	BTS1
YOR335C	ALA1	YPL072W	UBP16
YOR337W	TEA1	YPL077C
YOR338W		YPL078C	ATP4
YOR341W	RPA190	YPL079W	RPL21B
YOR344C	TYE7	YPL081W	RPS9A
YOR346W	REV1	YPL082C	MOT1
YOR354C	MSC6	YPL085W	SEC16
YOR359W	VTS1	YPL086C	ELP3
YOR360C	PDE2	YPL089C	RLM1
YOR364W		YPL090C	RPS6A
YOR367W	SCP1	YPL092W	SSU1
YOR369C	RPS12	YPL093W	NOG1
YOR372C	NDD1	YPL096W	PNG1
YOR373W	NUD1	YPL098C	MGR2
YOR374W	ALD4	YPL104W	MSD1
YOR375C	GDH1	YPL105C	SYH1
YOR382W	FIT2	YPL106C	SSE1
YOR383C	FIT3	YPL110C	GDE1
YOR386W	PHR1	YPL117C	IDI1
YOR390W	FEX1	YPL125W	KAP120
YPL004C	LSP1	YPL126W	NAN1
YPL006W	NCR1	YPL127C	HHO1
YPL009C	TAE2	YPL129W	TAF14
YPL010W	RET3	YPL135W	ISU1
YPL012W	RRP12	YPL137C	GIP3
YPL016W	SWI1	YPL138C	SPP1
YPL019C	VTC3	YPL141C	FRK1
YPL023C	MET12	YPL143W	RPL33A
YPL026C	SKS1	YPL145C	KES1
YPL029W	SUV3	YPL146C	NOP53
YPL032C	SVL3	YPL154C	PEP4
YPL037C	EGD1	YPL158C	AIM44
YPL038W-A		YPL160W	CDC60
YPL039W		YPL161C	BEM4
YPL040C	ISM1	YPL163C	SVS1
YPL048W	CAM1	YPL164C	MLH3
YPL055C	LGE1	YPL167C	REV3
YPL059W	GRX5	YPL169C	MEX67
YPL061W	ALD6	YPL173W	MRPL40
YPL063W	TIM50	YPL175W	SPT14
YPL066W	RGL1	YPL177C	CUP9
YPL069C	BTS1	YPL179W	PPQ1
YPL072W	UBP16	YPL183C	RTT10
YPL077C		YPL184C	MRN1
YPL078C	ATP4	YPL188W	POS5
YPL079W	RPL21B	YPL190C	NAB3
YPL081W	RPS9A	YPL198W	RPL7B
YPL082C	MOT1	YPL204W	HRR25
YPL085W	SEC16	YPL207W	TYW1
YPL086C	ELP3	YPL212C	PUS1
YPL089C	RLM1	YPL215W	CBP3
YPL090C	RPS6A	YPL218W	SAR1
YPL092W	SSU1	YPL219W	PCL8
YPL093W	NOG1	YPL220W	RPL1A
YPL096W	PNG1	YPL225W
YPL098C	MGR2	YPL226W	NEW1
YPL104W	MSD1	YPL227C	ALG5
YPL105C	SYH1	YPL230W	USV1
YPL106C	SSE1	YPL231W	FAS2
YPL110C	GDE1	YPL237W	SUI3
YPL117C	IDI1	YPL240C	HSP82
YPL125W	KAP120	YPL241C	CIN2
[truncated: 128 more rows]
