# Supplementary material for: A novel translational control mechanism involving RNA structures within coding sequences
Source: HighWire-hosted journal article supplement (doi:10.1101/gr.209015.116), 2016-11-07
Supplement: Supplemental_Table_S3.xlsx [file Supplemental_Table_S3.xlsx]

## Sheet: Table_S3
	Supplemental Table S3: Significance of PARS score differences. The significance was calculated using a standard independent two-sample test that assumes equal population variances.
	(A) Significance of metagene PARS score differences between the subsets (Fig. 5C) indicated for each position (e.g. position “5” means from 5%-10%).
	(B) Significance of PARS score differences per nucleotide between the subsets (Fig.5D) indicated for each nucleotide beginning 100 nucleotides before the "AUG". Positions with a p-value < 0,05 are marked in red. If a region contains several nucleotides with p-values < 0,05 the position is marked in bold.
(A)	pos	Activated vs repressed	Activated vs unchanged	Activated vs all		(B)	pos	Activated vs repressed	Activated vs unchanged	Activated vs all
	-100	0.00874	5.37e-05	5.49e-05			-100	0.873038	0.69965	0.3244
	-75	0.13684	0.2419	0.6905			-99	0.485445	0.0709193	0.492418
	-50	2.77e-05	1.19e-08	2.87e-07			-98	0.416144	0.803376	0.414462
	-25	0.02435	0.00215	0.00016			-97	0.796559	0.264114	0.794478
	0	3.53e-06	2.64e-20	3.71e-09			-96	0.880724	0.59335	0.434959
	5	0.00424	1.94e-22	4.37e-09			-95	0.840055	0.451817	0.580337
	10	1.38e-11	6.99e-22	3.56e-07			-94	0.881334	0.710036	0.445657
	15	5.09e-09	2.82e-30	1.28e-10			-93	0.388494	0.897645	0.907942
	20	4.11e-05	3.31e-22	2.81e-06			-92	0.95313	0.831313	0.984978
	25	3.43e-05	3.07e-26	1.9e-05			-91	0.110482	0.063605	0.0468125
	30	0.00166	9.04e-20	0.00026			-90	0.341147	0.191799	0.456026
	35	1.91e-06	1.04e-21	4.62e-08			-89	0.211229	0.415688	0.505278
	40	3.57e-05	7.22e-37	4.63e-16			-88	0.253457	0.332811	0.175909
	45	5.24e-05	8.73e-16	2.66e-08			-87	0.904097	0.177275	0.858466
	50	0.032	4.62e-20	0.00944			-86	0.948758	0.319582	0.583368
	55	0.0013	1.74e-19	0.00056			-85	0.653686	0.797091	0.989864
	60	6.19e-05	1.63e-16	1.62e-05			-84	0.0979918	0.00679368	0.00655104
	65	6.9e-05	1.62e-35	5.79e-11			-83	0.21597	0.0122596	0.0569121
	70	5.14e-06	6.89e-17	7.78e-05			-82	0.0798917	0.0592762	0.126109
	75	6.87e-13	8.42e-40	5.91e-22			-81	0.233848	0.0359477	0.135907
	80	7.99e-09	2.93e-25	8.68e-19			-80	0.733267	0.905967	0.614045
	85	2.89e-09	6.54e-31	4.68e-17			-79	0.967349	0.271632	0.186699
	90	0.00031	2.08e-22	2.21e-12			-78	0.264044	0.0239794	0.0163162
	95	9.06e-09	4.31e-34	2.26e-22			-77	0.5144	0.917903	0.804267
	100	1	1	1			-76	0.519575	0.925662	0.841211
	125	1	1	1			-75	0.307066	0.842797	0.257804
	150	1	1	1			-74	0.268843	0.498643	0.659761
	175	1	1	1			-73	0.393184	0.403172	0.385096
							-72	0.718904	0.428508	0.564548
							-71	0.0888387	0.0315074	0.170806
							-70	0.512591	0.312872	0.466546
							-69	0.535091	0.61227	0.860026
							-68	0.377724	0.301923	0.11539
							-67	0.807539	0.873612	0.40424
							-66	0.29237	0.971772	0.447538
							-65	0.0160789	0.172684	0.294064
							-64	0.102078	0.906295	0.817781
							-63	0.54054	0.742725	0.385561
							-62	0.34039	0.967916	0.355733
							-61	0.885351	0.418655	0.805176
							-60	0.926659	0.278026	0.146467
							-59	0.882778	0.468727	0.170186
							-58	0.694385	0.748734	0.635471
							-57	0.972824	0.753056	0.65943
							-56	0.4392	0.352481	0.327355
							-55	0.601522	0.884291	0.801072
							-54	0.665059	0.941213	0.645396
							-53	0.223615	0.531889	0.974222
							-52	0.816684	0.881198	0.80053
							-51	0.735491	0.982276	0.793133
							-50	0.999863	0.872219	0.727315
							-49	0.408174	0.999755	0.243741
							-48	0.88586	0.630503	0.570128
							-47	0.451667	0.606643	0.596286
							-46	0.116115	0.0746815	0.501641
							-45	0.189763	0.199681	0.228725
							-44	0.168963	0.258154	0.223715
							-43	0.952558	0.0132093	0.139806
							-42	0.577802	0.138856	0.506168
							-41	0.964982	0.779938	0.932333
							-40	0.717736	0.535826	0.834279
							-39	0.743042	0.692876	0.768783
							-38	0.402491	0.9692	0.761616
							-37	0.577072	0.835782	0.520903
							-36	0.0637853	0.179225	0.28151
							-35	0.656325	0.331386	0.492767
							-34	0.95287	0.615133	0.865513
							-33	0.612216	0.897381	0.954745
							-32	0.0356222	0.561163	0.180063
							-31	0.599432	0.794455	0.918885
							-30	0.858867	0.142941	0.230748
							-29	0.78165	0.978958	0.676775
							-28	0.780318	0.70038	0.951528
							-27	0.722389	0.907081	0.718089
							-26	0.28286	0.405307	0.993193
							-25	0.933221	0.586173	0.28523
							-24	0.653351	0.950661	0.852909
							-23	0.7304	0.38351	0.228646
							-22	0.921912	0.0075512	0.244316
							-21	0.499775	0.161904	0.295865
							-20	0.746295	0.108368	0.366818
							-19	0.135571	0.212332	0.178448
							-18	0.106078	0.477937	0.228451
							-17	0.984024	0.689912	0.950733
							-16	0.925336	0.99783	0.996976
							-15	0.138963	0.973655	0.968348
							-14	0.331124	0.732721	0.346926
							-13	0.362651	0.134129	0.163725
							-12	0.0163701	0.000210702	0.00420513
							-11	0.00818948	0.0248852	0.283627
							-10	0.225573	0.509587	0.198273
							-9	0.0311934	0.581047	0.254836
							-8	0.177886	0.475325	0.289531
							-7	0.867423	0.912083	0.430473
							-6	0.862226	0.375449	0.386248
							-5	0.535615	0.112281	0.197378
							-4	0.130641	0.939867	0.33214
							-3	0.578334	0.956643	0.563304
							-2	0.27863	0.126611	0.0855993
							-1	0.141366	0.249639	0.0101089
							0	0.0142805	0.142656	0.00755131
							1	0.0117561	0.0211544	0.000582506
							2	0.915729	0.352993	0.253481
							3	0.935488	0.34446	0.449899
							4	0.935616	0.0122123	0.00535139
							5	0.651364	0.121856	0.0869037
							6	0.992974	0.190153	0.0430661
							7	0.411222	0.118787	0.0295765
							8	0.208708	0.0306053	0.0576082
							9	0.903164	0.167946	0.316186
							10	0.204093	0.0658872	0.0665887
							11	0.353465	0.00891514	0.0226508
							12	0.129814	0.622959	0.294547
							13	0.259394	0.861867	0.858601
							14	0.353249	0.551719	0.802468
							15	0.628674	0.701139	0.62073
							16	0.709218	0.220575	0.707904
							17	0.362169	0.14087	0.228893
							18	0.852563	0.143297	0.48824
							19	0.959383	0.41222	0.4327
							20	0.373258	0.572036	0.689525
							21	0.729456	0.362302	0.10907
							22	0.0094795	0.0283331	0.0208328
							23	0.0347098	0.0769431	0.0509737
							24	0.00879969	0.00242032	0.0460866
							25	0.179491	0.0255947	0.50579
							26	0.424746	0.143399	0.189571
							27	0.985027	0.966818	0.531868
							28	0.154106	0.106131	0.549788
							29	0.096049	0.00471989	0.0408677
							30	0.0852139	0.0123979	0.0456914
							31	0.636066	0.00930681	0.192715
							32	0.935687	0.114022	0.357011
							33	0.519641	0.0209037	0.0392085
							34	0.317325	0.0269707	0.139779
							35	0.847503	0.0822136	0.0972859
							36	0.664739	0.749518	0.186148
							37	0.181316	0.535689	0.268434
							38	0.625289	0.286036	0.825563
							39	0.0632243	0.0333659	0.119936
							40	0.00608544	0.0213911	0.0283482
							41	0.166301	0.0281445	0.092656
							42	0.856355	0.765464	0.911068
							43	0.45903	0.0308684	0.0540792
							44	0.955339	0.168293	0.336762
							45	0.176952	0.325258	0.37332
							46	0.314043	0.536401	0.406104
							47	0.948858	0.465628	0.278523
							48	0.790585	0.188144	0.270727
							49	0.396604	0.361041	0.0688112
							50	0.28424	0.54347	0.715021
							51	0.402832	0.518944	0.794222
							52	0.99003	0.130018	0.251689
							53	0.069697	0.132084	0.111845
							54	0.180493	0.330627	0.412832
							55	0.0981736	0.865229	0.714357
							56	0.637671	0.0261426	0.0895503
							57	0.918646	0.0944915	0.291192
							58	0.102936	0.394165	0.516912
							59	0.743785	0.960827	0.656287
							60	0.325383	0.676423	0.666011
							61	0.771976	0.565453	0.988687
							62	0.201846	0.14268	0.133862
							63	0.481323	0.0985043	0.134968
							64	0.654751	0.695793	0.433907
							65	0.547785	0.16017	0.34802
							66	0.148871	0.100675	0.17077
							67	0.208084	0.0139874	0.0571331
							68	0.524775	0.0131855	0.0455921
							69	0.341199	0.0137481	0.136289
							70	0.0147573	0.00020406	0.00874737
							71	0.474098	0.0123137	0.0685902
							72	0.77198	0.0305895	0.329666
							73	0.165233	0.953377	0.214591
							74	0.340446	0.0857807	0.295334
							75	0.61645	0.33386	0.381421
							76	0.0661445	0.0390963	0.0209945
							77	0.25866	0.0359883	0.0154362
							78	0.831737	0.120931	0.189904
							79	0.386059	0.212514	0.0709181
							80	0.125153	0.000585417	0.00132611
							81	0.514433	0.185607	0.0667046
							82	0.0189697	0.0533769	0.0156944
							83	0.011187	0.244326	0.015985
							84	0.178245	0.914715	0.435891
							85	0.0863885	0.192368	0.251133
							86	0.025681	0.026361	0.00657911
							87	0.012032	0.042438	0.0236432
							88	0.408255	0.322436	0.937759
							89	0.0549965	0.000771976	0.0124213
							90	0.0758532	0.153481	0.921105
							91	0.600613	0.00825779	0.154427
							92	0.201683	0.000372024	0.0294065
							93	0.419522	0.045722	0.104947
							94	0.216961	0.0248452	0.26817
							95	0.478345	0.221564	0.435288
							96	0.0480443	0.0468611	0.0139018
							97	0.031598	0.00965676	0.0268578
							98	0.0505042	0.00254339	0.00142889
							99	0.0594635	0.0421176	0.120048
							100	0.0962228	0.537007	0.214238
							101	0.0321203	0.110721	0.0333381
							102	0.0243396	0.336907	0.0597671
							103	0.410653	0.440794	0.24208
							104	0.278946	0.397476	0.36195
							105	0.0128067	0.164724	0.0271093
							106	0.141307	0.738881	0.883826
							107	0.0528148	0.760462	0.350023
							108	0.0141295	0.0357915	0.0970989
							109	0.0248718	0.010916	0.0452661
							110	0.979728	0.0852404	0.677683
							111	0.180461	0.0133502	0.0447977
							112	0.421805	0.00847948	0.0903903
							113	0.093234	0.00275169	0.0444178
							114	0.0155678	0.0484758	0.0894602
							115	0.739322	0.893105	0.854879
							116	0.776094	0.109071	0.195084
							117	0.292007	0.682851	0.398652
							118	0.0428378	0.0728135	0.0144394
							119	0.234932	0.0502625	0.0716115
							120	0.909127	0.165725	0.271456
							121	0.207617	0.00126768	0.00434769
							122	0.94889	0.548932	0.806058
							123	0.562253	0.441396	0.586966
							124	0.10648	0.117367	0.04176
							125	0.989452	0.285457	0.527319
							126	0.532379	0.816757	0.780018
							127	0.198028	0.634745	0.63348
							128	0.328215	0.01432	0.229247
							129	0.0577298	0.356349	0.175219
							130	0.605943	0.834495	0.849835
							131	0.676073	0.370143	0.802154
							132	0.613881	0.853478	0.811606
							133	0.39819	0.4856	0.953912
							134	0.205994	0.630383	0.545223
							135	0.936932	0.375885	0.387351
							136	0.161277	0.218282	0.0598339
							137	0.70593	0.726646	0.899233
							138	0.557819	0.440067	0.974753
							139	0.427847	0.0272651	0.0993628
							140	0.854528	0.345837	0.339454
							141	0.54593	0.965486	0.974673
							142	0.354845	0.10912	0.119399
							143	0.318043	0.397727	0.519504
							144	0.4217	0.473581	0.472382
							145	0.673547	0.0825797	0.0430732
							146	0.985718	0.0229864	0.0551224
							147	0.619129	0.0201481	0.118698
							148	0.858394	0.0114122	0.161904
							149	0.573706	0.0409611	0.159876
							150	0.314535	0.0363655	0.139899
							151	0.67083	0.793978	0.671841
							152	0.302485	0.131611	0.239267
							153	0.197522	0.165632	0.150218
							154	0.323267	0.653494	0.422187
							155	0.137043	0.181653	0.234028
							156	0.722542	0.249588	0.364757
							157	0.173547	0.498307	0.433399
							158	0.0391058	0.246292	0.700279
							159	0.327916	0.102706	0.164639
							160	0.707578	0.0271307	0.115738
							161	0.0181788	0.00190505	0.0167414
							162	0.00100192	0.0325888	0.0760574
							163	0.0441084	0.101371	0.830639
							164	0.530263	0.156674	0.600817
							165	0.487562	0.821765	0.21717
							166	0.399236	0.804986	0.477003
							167	0.195027	0.954853	0.683056
							168	0.195353	0.156911	0.0772158
							169	0.865518	0.155594	0.129933
							170	0.452733	0.00177836	0.0223563
							171	0.453457	0.0756038	0.0627189
							172	0.851988	0.0405062	0.080381
							173	0.660525	0.500334	0.994545
							174	0.996718	0.637926	0.566667
							175	0.664227	0.261148	0.0554727
							176	0.460937	0.774101	0.806599
							177	0.236165	0.779548	0.505986
							178	0.249951	0.27512	0.286765
							179	0.0499614	0.0840329	0.0806761
							180	0.59976	0.940407	0.242407
							181	0.564506	0.0220059	0.0176136
							182	0.20384	0.0169477	0.0507516
							183	0.267739	0.701738	0.810656
							184	0.985104	0.0193706	0.230851
							185	0.0212953	0.0472624	0.0380715
							186	0.0268	0.0916948	0.1086
							187	0.399203	0.77658	0.828818
							188	0.573727	0.00784807	0.0130199
							189	0.770661	0.0806547	0.282903
							190	0.905359	0.560024	0.782314
							191	0.723801	0.204071	0.227132
							192	0.214821	0.744187	0.971944
							193	0.12684	0.499909	0.382549
							194	0.169793	0.852899	0.67605
							195	0.110607	0.442091	0.989841
							196	0.550556	0.904907	0.509551
							197	0.0395427	0.717929	0.61066
							198	0.312872	0.0663734	0.090142
							199	0.208078	0.138808	0.492582
							200	0.772498	0.0956615	0.157103
							201	0.802337	0.0246887	0.105274
							202	0.798302	0.0799323	0.229251
							203	0.540695	0.349905	0.342869
							204	0.360924	0.000323263	0.00367664
							205	0.677311	0.100988	0.0374645
							206	0.907576	0.00221255	0.0198817
							207	0.402215	0.114448	0.15182
							208	0.286417	0.115238	0.247186
							209	0.0106122	0.00118648	0.00922571
							210	0.0101444	0.54285	0.264996
							211	0.352392	0.0756522	0.0777736
							212	0.167863	0.0523195	0.0114854
							213	0.936805	0.0950829	0.0658772
							214	0.192951	0.14333	0.319204
							215	0.495956	0.665022	0.742782
							216	0.662138	0.0608841	0.0826233
							217	0.28539	0.151509	0.173885
							218	0.074476	0.0317561	0.0171638
							219	0.0240646	0.0613167	0.0625523
							220	0.732953	0.112569	0.0713466
							221	0.387925	0.0501719	0.0147447
							222	0.101115	0.0824845	0.0805124
							223	0.0736128	0.0877128	0.0585558
							224	0.26497	0.0511149	0.49221
							225	0.201619	0.00500014	0.192325
							226	0.176839	0.000172735	0.0965126
							227	0.0903892	0.0170296	0.0657373
							228	0.0135216	0.00608832	0.113075
							229	0.00873704	0.0287038	0.106822
							230	0.0202877	0.000528243	0.00389368
							231	0.499924	0.0631951	0.0437874
							232	0.248698	0.127256	0.381632
							233	0.204094	0.090936	0.130481
							234	0.0929061	0.0987261	0.153855
							235	0.633877	0.13453	0.0784937
							236	0.0678289	0.153502	0.0208745
							237	0.0395359	0.0302993	0.00862444
							238	0.227766	0.0178873	0.0134528
							239	0.198726	0.0551189	0.0217757
							240	0.877398	0.302247	0.312579
							241	0.899088	0.33185	0.243771
							242	0.752311	0.0114978	0.0240113
							243	0.51041	0.2886	0.248924
							244	0.938452	0.1572	0.460054
							245	0.326449	0.753033	0.697476
							246	0.756777	0.268831	0.46731
							247	0.754553	0.331153	0.132919
							248	0.59903	0.017803	0.0756173
							249	0.456999	0.0148812	0.132437
							250	0.144385	0.00378426	0.0145027
							251	0.660222	0.0168031	0.163721
							252	0.137445	0.0174376	0.0681342
							253	0.168847	0.211388	0.320996
							254	0.771508	0.540728	0.333146
							255	0.164444	0.0695427	0.0941187
							256	0.261226	0.639094	0.926841
							257	0.511202	0.0496143	0.266562
							258	0.83677	0.0107108	0.0494563
							259	0.446865	0.0620801	0.179684
							260	0.311726	0.158674	0.0574573
							261	0.292568	0.693883	0.312683
							262	0.407279	0.254824	0.16292
							263	0.764573	0.0542693	0.0693846
							264	0.991529	0.0818933	0.0921133
							265	0.394265	0.0683499	0.0961428
							266	0.767069	0.272813	0.671911
							267	0.682784	0.116757	0.0622841
							268	0.790888	0.445878	0.527653
							269	0.483824	0.302554	0.964653
							270	0.198963	0.241053	0.895664
							271	0.536261	0.441921	0.97094
							272	0.21593	0.969433	0.929301
							273	0.675363	0.989074	0.891526
							274	0.467618	0.129839	0.39617
							275	0.0604547	0.480629	0.310755
							276	0.728422	0.326431	0.992202
							277	0.88795	0.659348	0.51336
							278	0.399695	0.0223956	0.270222
							279	0.438119	0.285282	0.651705
							280	0.0712313	0.000932347	0.0351013
							281	0.918731	0.120751	0.496081
							282	0.203125	0.392126	0.884459
							283	0.60599	0.598632	0.678905
							284	0.369921	0.116125	0.252891
							285	0.778223	0.242186	0.335373
							286	0.122341	0.182733	0.212881
							287	0.178847	0.0898223	0.224988
							288	0.0866026	0.01329	0.0818938
							289	0.126835	0.0314683	0.0775289
							290	0.602613	0.89065	0.64716
							291	0.696851	0.327786	0.495666
							292	0.330146	0.0444097	0.26528
							293	0.542605	0.381706	0.566336
							294	0.111575	0.347239	0.564686
							295	0.179326	0.459326	0.539594
							296	0.886192	0.989412	0.835497
							297	0.915227	0.551228	0.898198
							298	0.364075	0.303125	0.71233
							299	0.418204	0.697855	0.918723
							300	0.89162	0.851343	0.879322
							301	0.189637	0.722113	0.751351
							302	0.961672	0.179201	0.312089
							303	0.430425	0.133457	0.245424
							304	0.795769	0.0356263	0.193208
							305	0.262465	0.543752	0.770785
							306	0.495482	0.60001	0.97462
							307	0.564929	0.461313	0.633929
							308	0.128898	0.113318	0.877683
							309	0.548245	0.00201698	0.0586447
							310	0.163915	0.00323255	0.0532992
							311	0.00149984	0.0509602	0.0763511
							312	0.0410834	0.00330159	0.0165038
							313	0.17436	0.00545383	0.106797
							314	0.0570941	0.0190381	0.009185
							315	0.131042	0.0702515	0.124369
							316	0.715837	0.0692223	0.39642
							317	0.0444002	0.00317806	0.0208633
							318	0.37098	0.0211911	0.114356
							319	0.586225	0.170026	0.133491
							320	0.907527	0.22037	0.602648
							321	0.899431	0.360508	0.212474
							322	0.889949	0.942687	0.898176
							323	0.808108	0.768184	0.720493
							324	0.597267	0.177286	0.592506
							325	0.159194	0.00933866	0.0980665
							326	0.0101944	0.00212425	0.00110028
							327	0.131698	0.0352445	0.0863274
							328	0.756978	0.0337603	0.184445
							329	0.953188	0.146156	0.30084
							330	0.909536	0.102012	0.0289904
							331	0.888897	0.595006	0.23847
							332	0.582627	0.13524	0.122854
							333	0.106513	0.208657	0.239046
							334	0.024768	0.00113061	0.00690121
							335	0.0598212	0.0126567	0.0658208
							336	0.0117468	0.0515775	0.0342996
							337	0.206112	0.250708	0.570952
							338	0.354483	0.322708	0.172568
							339	0.381212	0.740869	0.253306
							340	0.274741	0.17191	0.118682
							341	0.204649	0.024061	0.0565135
							342	0.566792	0.105052	0.259928
							343	0.170622	0.0371116	0.0194193
							344	0.294698	0.344307	0.167843
							345	0.421732	0.432363	0.782062
							346	0.701386	0.573819	0.623916
							347	0.810033	0.939342	0.771426
							348	0.407101	0.557539	0.890145
							349	0.556073	0.459787	0.389331
							350	0.29348	0.366293	0.519626
							351	0.98007	0.552092	0.532393
							352	0.750066	0.383152	0.488679
							353	0.259677	0.2679	0.510178
							354	0.400795	0.144623	0.119767
							355	0.952527	0.672644	0.785541
							356	0.703072	0.280258	0.346188
							357	0.213889	0.345798	0.726904
							358	0.439185	0.174286	0.487188
							359	0.151823	0.0987523	0.327602
							360	0.0160901	0.063303	0.0922449
							361	0.640189	0.237661	0.158846
							362	0.694621	0.262817	0.891144
							363	0.556661	0.478717	0.690659
							364	0.961901	0.721872	0.692115
							365	0.348697	0.787739	0.521519
							366	0.116212	0.865481	0.531927
							367	0.942048	0.219707	0.380834
							368	0.989408	0.650093	0.841489
							369	0.842215	0.846698	0.979053
							370	0.0951438	0.156541	0.3839
							371	0.0513318	0.0234894	0.0760862
							372	0.0662136	0.0474529	0.121667
							373	0.967101	0.336417	0.727014
							374	0.769412	0.168778	0.451039
							375	0.344718	0.368966	0.565821
							376	0.2595	0.0501033	0.173912
							377	0.238814	0.705818	0.826968
							378	0.809931	0.474138	0.669888
							379	0.647266	0.0738577	0.409434
							380	0.614245	0.0284746	0.0971362
							381	0.873755	0.104689	0.0940763
							382	0.525235	0.0551077	0.0571697
							383	0.937755	0.903083	0.493967
							384	0.00125188	0.000457754	0.00864511
							385	0.000878372	0.000518212	0.0156419
							386	0.722241	0.15739	0.275761
							387	0.547245	0.968101	0.956614
							388	0.0909117	0.193228	0.227151
							389	0.0604345	0.0849694	0.506145
							390	0.0178731	0.000289515	0.0539153
							391	0.955245	0.0232291	0.289042
							392	0.346754	0.0391019	0.164589
							393	0.183387	0.0190652	0.0763841
							394	0.183745	0.0939189	0.131935
							395	0.571424	0.0479107	0.0444015
							396	0.312725	0.125362	0.168973
							397	0.398899	0.0634435	0.0720928
							398	0.768839	0.698821	0.22723
							399	0.926005	0.127963	0.130556
							400	0.504518	0.754216	0.885201
							401	0.436959	0.0827825	0.122626
							402	0.428793	0.350691	0.440291
							403	0.314937	0.032854	0.103407
							404	0.819106	0.29173	0.915369
							405	0.292309	0.151227	0.230885
							406	0.642489	0.175689	0.230388
							407	0.608003	0.107548	0.207213
							408	0.358722	0.00491294	0.0716619
							409	0.308062	0.00353049	0.0258346
							410	0.157494	0.00080169	0.00420553
							411	0.882884	0.140236	0.181779
							412	0.530169	0.839855	0.862132
							413	0.233444	0.712377	0.474884
							414	0.336793	0.57019	0.642927
							415	0.540607	0.436497	0.39976
							416	0.994702	0.590787	0.890587
							417	0.304772	0.221331	0.1056
							418	0.817889	0.279383	0.456858
							419	0.290459	0.196859	0.301224
							420	0.297706	0.661549	0.910468
							421	0.68536	0.577229	0.578377
							422	0.635947	0.465061	0.287607
							423	0.602802	0.112524	0.12536
							424	0.44066	0.725435	0.802028
							425	0.864349	0.477797	0.691949
							426	0.659614	0.654001	0.851641
							427	0.709467	0.525234	0.730401
							428	0.650055	0.269372	0.955627
							429	0.221316	0.966947	0.392789
							430	0.972467	0.22643	0.679749
							431	0.723065	0.159398	0.543536
							432	0.835312	0.236118	0.649427
							433	0.281931	0.140889	0.322905
							434	0.450171	0.00807576	0.0855177
							435	0.698069	0.501638	0.674934
							436	0.581328	0.262827	0.990988
							437	0.428371	0.60821	0.676014
							438	0.0399712	0.33766	0.332293
							439	0.286217	0.315956	0.302791
							440	0.128067	0.323463	0.541498
							441	0.180785	0.301226	0.309305
							442	0.748807	0.456209	0.675098
							443	0.157674	0.155146	0.178852
							444	0.212405	0.0962806	0.241113
							445	0.13323	0.0183921	0.108992
							446	0.269903	0.563471	0.409204
							447	0.0987658	0.30185	0.110533
							448	0.745527	0.747328	0.767734
							449	0.684422	0.252684	0.740628
							450	0.472564	0.155667	0.241227
							451	0.699628	0.0608395	0.300754
							452	0.639859	0.826481	0.274321
							453	0.445471	0.200246	0.720093
							454	0.148869	0.132659	0.423293
							455	0.0591053	0.131417	0.374274
							456	0.0059822	0.00148725	0.00174052
							457	0.0458228	0.0229809	0.0382083
							458	0.119598	0.0127395	0.0943525
							459	0.156274	0.695465	0.577981
							460	0.190307	0.711142	0.783121
							461	0.230001	0.0665402	0.0611825
							462	0.167196	0.00726159	0.0114134
							463	0.212595	0.143638	0.100255
							464	0.585123	0.244956	0.298876
							465	0.0664886	0.0184312	0.00878078
							466	0.297825	0.0283515	0.362139
							467	0.927305	0.0336451	0.357752
							468	0.374456	0.140918	0.740912
							469	0.206689	0.0240471	0.193707
							470	0.715908	0.060449	0.409635
							471	0.673381	0.312658	0.55605
							472	0.86884	0.997405	0.644989
							473	0.291182	0.618515	0.966417
							474	0.893526	0.651672	0.757886
							475	0.846355	0.890837	0.494977
							476	0.417459	0.465874	0.461201
							477	0.4348	0.422531	0.251344
							478	0.883829	0.0957185	0.484684
							479	0.60878	0.358991	0.797376
							480	0.296708	0.129257	0.16985
							481	0.145156	0.0315614	0.208754
							482	0.0603567	0.00152145	0.0262652
							483	0.128714	0.0906531	0.134757
							484	0.72493	0.106044	0.980908
							485	0.775699	0.175619	0.62211
							486	0.821421	0.772733	0.291701
							487	0.864971	0.592927	0.677746
							488	0.598846	0.445958	0.766121
							489	0.56742	0.119263	0.225453
							490	0.336474	0.0165003	0.0046552
							491	0.384136	0.0408897	0.0369137
							492	0.636265	0.710594	0.44181
							493	0.352746	0.472067	0.396559
							494	0.347859	0.169201	0.330101
							495	0.851228	0.115743	0.896633
							496	0.218643	0.0735628	0.303227
							497	0.63159	0.952761	0.608249
							498	0.416681	0.155957	0.334053
							499	0.876154	0.0788136	0.689113
							500	0.461192	0.000169303	0.0372869
							501	0.827774	0.000811121	0.0666197
							502	0.031992	0.00562752	0.0448772
							503	0.251515	0.0162855	0.226407
							504	0.86924	0.215038	0.576583
							505	0.577238	0.162797	0.423004
							506	0.363292	0.170838	0.461187
							507	0.125847	0.169476	0.0228914
							508	0.282831	0.114667	0.138701
							509	0.920178	0.271705	0.660762
							510	0.19226	0.655987	0.512804
							511	0.801102	0.158812	0.405387
							512	0.358414	0.0294737	0.232015
							513	0.225956	0.178464	0.846168
							514	0.438168	0.168257	0.840192
							515	0.349058	0.282483	0.770547
							516	0.103754	0.928577	0.952123
							517	0.878355	0.782113	0.901946
							518	0.896609	0.267074	0.479661
							519	0.152163	0.0238036	0.218107
							520	0.890184	0.174275	0.317285
							521	0.165535	0.000290545	0.0101606
							522	0.59282	0.257017	0.149202
							523	0.761184	0.162264	0.209665
							524	0.550968	0.187565	0.230692
							525	0.0725882	0.165122	0.330045
							526	0.487419	0.0616941	0.52162
							527	0.443023	0.0369974	0.510072
							528	0.0343279	0.0805419	0.612656
							529	0.24509	0.0907941	0.800555
							530	0.190025	0.177161	0.23021
							531	0.453515	0.518172	0.985742
							532	0.838191	0.153059	0.192098
							533	0.406122	0.703397	0.759377
							534	0.432583	0.0736696	0.103814
							535	0.227009	0.192013	0.172221
							536	0.591247	0.141754	0.74333
							537	0.579593	0.079611	0.317232
							538	0.247839	0.339286	0.219266
							539	0.867217	0.626173	0.303389
							540	0.282334	0.00701119	0.0353753
							541	0.77917	0.0221414	0.131921
							542	0.502962	0.0253516	0.0488125
							543	0.948794	0.247256	0.78113
							544	0.911588	0.145257	0.793599
							545	0.568957	0.146136	0.891339
							546	0.698	0.0593871	0.852847
							547	0.204502	0.0627803	0.135755
							548	0.109521	0.0740398	0.0921069
							549	0.665018	0.277136	0.677587
							550	0.102654	0.122335	0.100562
							551	0.0721846	0.346504	0.205984
							552	0.0295372	0.21106	0.247926
							553	0.436702	0.0265563	0.678942
							554	0.0799433	0.0552594	0.218801
							555	0.219522	0.43537	0.662621
							556	0.11282	0.265258	0.572803
							557	0.576338	0.540932	0.219907
							558	0.843349	0.157823	0.594194
							559	0.772091	0.220726	0.656129
							560	0.173573	0.0249996	0.197839
							561	0.496252	0.290772	0.646759
							562	0.867875	0.445931	0.636252
							563	0.462669	0.432663	0.804721
							564	0.248263	0.609833	0.594338
							565	0.219271	0.574881	0.815007
							566	0.401929	0.951561	0.899643
							567	0.067984	0.0359561	0.23715
							568	0.151203	0.263088	0.121204
							569	0.0780665	0.142216	0.101889
							570	0.198997	0.289133	0.0328956
							571	0.149409	0.134019	0.154016
							572	0.166686	0.0745175	0.224105
							573	0.134336	0.173115	0.32257
							574	0.00246545	0.0200503	0.0567529
							575	0.147816	0.103411	0.418821
							576	0.930527	0.693935	0.22937
							577	0.765293	0.534804	0.999739
							578	0.722637	0.37254	0.305721
							579	0.515837	0.0906701	0.255224
							580	0.909002	0.22643	0.472115
							581	0.516533	0.0178454	0.136889
							582	0.594939	0.163739	0.59921
							583	0.197673	0.041682	0.122634
							584	0.624853	0.444653	0.560898
							585	0.139382	0.768499	0.718955
							586	0.00135263	0.0187696	0.381161
							587	0.0440016	0.00322042	0.193578
							588	0.0476988	0.0262346	0.294713
							589	0.16164	0.00595403	0.116064
							590	0.25679	0.0363219	0.181032
							591	0.985283	0.0662277	0.295933
							592	0.695365	0.268207	0.576279
							593	0.222963	0.0561862	0.23009
							594	0.891338	0.791827	0.787575
							595	0.133243	0.0192674	0.0708665
							596	0.0545377	0.349765	0.26679
							597	0.0586681	0.023373	0.0170317
							598	0.075912	0.221201	0.0631454
							599	0.300612	0.141872	0.0780947
							600	0.381885	0.0318065	0.387023
							601	0.36792	0.0198765	0.112452
							602	0.60156	0.0700954	0.140589
							603	0.871151	0.313915	0.286688
							604	0.898411	0.150306	0.32973
							605	0.712721	0.104392	0.18394
							606	0.934405	0.418034	0.244997
							607	0.214712	0.462478	0.827764
							608	0.43557	0.936889	0.886543
							609	0.665043	0.0859606	0.192247
							610	0.97535	0.462617	0.844935
							611	0.56811	0.528653	0.713935
							612	0.324835	0.156467	0.296237
							613	0.38469	0.180431	0.398261
							614	0.491563	0.0832524	0.190777
							615	0.50437	0.032539	0.207801
							616	0.819753	0.0968707	0.0865666
							617	0.430567	0.00350344	0.0141012
							618	0.843173	0.025058	0.43916
							619	0.228686	0.158965	0.275737
							620	0.834541	0.226505	0.176151
							621	0.440807	0.0348525	0.0468056
							622	0.684681	0.24055	0.671504
							623	0.53764	0.152259	0.618888
							624	0.158595	0.00937098	0.185834
							625	0.0699101	0.0829668	0.296357
							626	0.126152	0.0351445	0.189689
							627	0.0565371	0.0172139	0.043537
							628	0.00591368	0.00863246	0.00893342
							629	0.162195	0.174788	0.177549
							630	0.288587	0.83074	0.485421
							631	0.765596	0.504791	0.377541
							632	0.339005	0.880843	0.996939
							633	0.821204	0.579068	0.752096
							634	0.483534	0.640208	0.695088
							635	0.473213	0.0906769	0.205117
							636	0.464361	0.00715203	0.0398304
							637	0.10944	0.00561541	0.0591775
							638	0.294656	0.0478201	0.130225
							639	0.25981	0.217329	0.220423
							640	0.42332	0.0623817	0.792557
							641	0.49984	0.928219	0.386815
							642	0.932686	0.343529	0.799903
							643	0.437	0.769899	0.533421
							644	0.59557	0.919713	0.802518
							645	0.560558	0.707243	0.844007
							646	0.247624	0.466867	0.315874
							647	0.154817	0.174164	0.0372665
							648	0.446714	0.932755	0.525464
							649	0.139578	0.00722332	0.0151424
							650	0.487588	0.140731	0.455631
							651	0.504283	0.198874	0.0998543
							652	0.683307	0.490928	0.824691
							653	0.178561	0.0110169	0.0541431
							654	0.0211756	0.0023314	0.0161921
							655	0.839294	0.0386519	0.57635
							656	0.876901	0.0810141	0.393072
							657	0.227976	0.664547	0.979742
							658	0.157025	0.620518	0.8466
							659	0.0311611	0.0323219	0.0301648
							660	0.13976	0.498297	0.356787
							661	0.0331332	0.0916074	0.0686794
							662	0.209542	0.133228	0.114301
							663	0.910133	0.595703	0.882313
							664	0.731159	0.526696	0.511892
							665	0.891998	0.278482	0.434327
							666	0.446458	0.969906	0.838317
							667	0.829896	0.749837	0.799965
							668	0.331814	0.774891	0.89978
							669	0.738943	0.804984	0.961006
							670	0.629777	0.261356	0.44219
							671	0.65531	0.348403	0.758735
							672	0.441876	0.335931	0.444278
							673	0.268404	0.199634	0.553627
							674	0.200652	0.628006	0.567498
							675	0.345951	0.694303	0.834549
							676	0.155436	0.0859644	0.584938
							677	0.717968	0.242635	0.484259
							678	0.898822	0.748759	0.910219
							679	0.739829	0.816588	0.687056
							680	0.206787	0.556428	0.997731
							681	0.151788	0.136947	0.239672
							682	0.0571992	0.343038	0.332082
							683	0.102267	0.0459256	0.113183
							684	0.0178179	0.00103464	0.000528212
							685	0.165767	0.311244	0.305105
							686	0.107127	0.098692	0.145403
							687	0.124353	0.185668	0.360933
							688	0.586109	0.114018	0.271975
							689	0.982169	0.662875	0.956697
							690	0.972218	0.0970688	0.250423
							691	0.940538	0.390367	0.137659
							692	0.379829	0.496426	0.426582
							693	0.72919	0.988647	0.73364
							694	0.799295	0.795086	0.828182
							695	0.223969	0.53835	0.656722
							696	0.751382	0.300682	0.807647
							697	0.394761	0.0372463	0.117471
							698	0.0685512	0.0257658	0.0213751
							699	0.669796	0.288294	0.214545
							700	0.20254	0.264347	0.19839
